# Supplementary material
Source: PubMed Central journal article supplement (PMC7009571)

## SUPPLEMENTARY ONLINE CONTENT

### Genetic determinants of blood lipids and cerebral small vessel disease: role of HDL cholesterol

#### Table of contents

|                                                                                                                                                                                                                                                                                                                                                                                                                                                      |    |
|------------------------------------------------------------------------------------------------------------------------------------------------------------------------------------------------------------------------------------------------------------------------------------------------------------------------------------------------------------------------------------------------------------------------------------------------------|----|
| <b>Supplementary Table 1.</b> Descriptive characteristics of the genome-wide association studies (GWAS) that were included in our Mendelian randomization analysis.....                                                                                                                                                                                                                                                                              | 3  |
| <b>Supplementary Table 2.</b> Genetic instruments for blood lipid levels selected from the meta-analyzed datasets of the Million Veterans Program (MVP) and the Global Lipids Genetics Consortium (GLGC). .....                                                                                                                                                                                                                                      | 4  |
| <b>Supplementary Table 3.</b> Trait-specific genetic instruments for blood lipid levels selected from the Global Lipids Genetics Consortium (GLGC) dataset. Variants were selected on the basis of their association with the respective trait at $p < 5E-8$ and a $p > 0.01$ regarding their association with the other two traits. ....                                                                                                            | 21 |
| <b>Supplementary Table 4.</b> Genetic instruments for the circulating cholesterol and triglyceride concentrations of the lipoprotein particles as selected and extracted from the dataset of the GWAS meta-analysis on Nuclear Magnetic Resonance (NMR)-measured circulating metabolites. ....                                                                                                                                                       | 23 |
| <b>Supplementary Table 5.</b> Genetic instruments for lipid drug targets, as selected and extracted from Global Lipids Genetics Consortium (GLGC) GWAS dataset. ....                                                                                                                                                                                                                                                                                 | 45 |
| <b>Supplementary Table 6.</b> Power calculations for the Mendelian randomization analyses performed in the current study.....                                                                                                                                                                                                                                                                                                                        | 47 |
| <b>Supplementary Table 7.</b> Mendelian randomization (MR) association estimates of cholesterol and triglyceride concentrations across lipoprotein particles with small vessel stroke and WMH volume. Shown are the results derived from IVW MR analyses.....                                                                                                                                                                                        | 48 |
| <b>Supplementary Table 8.</b> Multivariable Mendelian randomization (MR) association estimates of cholesterol and triglyceride concentrations across lipoprotein particles with small vessel stroke and WMH volume. ....                                                                                                                                                                                                                             | 49 |
| <b>Supplementary Table 9.</b> Mendelian randomization (MR) association estimates of cholesterol and triglyceride concentrations across lipoprotein particles with small vessel stroke and WMH volume, as derived from alternative MR methods in case of heterogeneity ( $p < 0.10$ in Cochran's Q) in the IVW analysis. Shown are the results derived from weighed median and MR-Egger analyses.....                                                 | 50 |
| <b>Supplementary Table 10.</b> Mendelian randomization (MR) association estimates of HDL-C raising variants in/close to the <i>CEPT</i> locus, and risk of small vessel stroke, as derived from alternative MR methods. Shown are the results derived from weighed median and MR-Egger analyses, because the IVW MR analysis showed significant heterogeneity.....                                                                                   | 51 |
| <b>Supplementary Table 11.</b> Mendelian randomization (MR) association estimates of HDL-C raising variants in/close to the <i>CEPT</i> locus, and risk of small vessel stroke, WMH volume, and risk of intracerebral hemorrhage, as derived from IVW MR analyses and multivariable MR analyses adjusting for the effects of the variants on both HDL-C and LDL-C. Shown are the results derived from the IVW MR and multivariable MR analyses. .... | 52 |
| <b>Supplementary Table 12.</b> Mendelian randomization (MR) association estimates of cholesterol and triglyceride concentrations across lipoprotein particles with intracerebral hemorrhage. Shown are the results derived from IVW MR and multivariable MR analyses. ....                                                                                                                                                                           | 53 |

**Supplementary Figure 1.** Sensitivity Mendelian randomization (MR) analyses between genetic determinants of blood lipid levels (HDL-C, LDL-C, TG) with risk of small vessel stroke. Shown are the results derived from IVW MR, weighted median, MR-Egger, and the GSMR approach incorporated with the HEIDI-outlier detector. The genetic instruments are weighted either based on the estimates derived from the full GLGC+MVP sample, or from those derived from the restricted GLGC dataset, where patients under lipid-modifying treatment had been excluded.....54

**Supplementary Figure 2.** Sensitivity Mendelian randomization (MR) analyses between genetic determinants of blood lipid levels (HDL-C, LDL-C, TG) with WMH volume. Shown are the results derived from IVW MR, weighted median, MR-Egger, and the GSMR approach incorporated with the HEIDI-outlier detector. The genetic instruments are weighted either based on the estimates derived from the full GLGC+MVP sample, or from those derived from the restricted GLGC dataset, where patients under lipid-modifying treatment had been excluded.....55

**Supplementary Figure 3.** Mendelian randomization (MR) associations between genetic determinants of blood lipid levels (HDL-C, LDL-C, TG) with (A) risk of small vessel stroke and (B) WMH volume when restricting instrument selection to those specific for the respective traits. Shown are the results derived from IVW MR.....56

**Supplementary Figure 4.** Mendelian randomization (MR) associations of all components of the HDL lipoprotein particles defined by size with (A) risk of small vessel stroke and (B) WMH volume. Shown are the results derived from IVW MR analyses. ....57

**Supplementary Figure 5.** Mendelian randomization (MR) associations of cholesterol (C) and triglyceride (TG) concentrations in lipoprotein particles defined by size with intracerebral hemorrhage. Shown are the results derived from IVW MR analyses. ....58

**Supplementary Figure 6.** Mendelian randomization associations between HDL-C-raising and LDL-C-lowering genetic variants in the loci of known lipid-modifying drug targets and risk of intracerebral hemorrhage. Shown are the results derived from IVW MR analyses. ....59

**Supplementary Figure 7.** Mendelian randomization (MR) associations between HDL-C-raising genetic variants in the *CETP* locus and risk of (A) deep and (B) lobar intracerebral hemorrhage (ICH). Shown are the results from the IVW MR analyses. The results are scaled per 1 SD increment in circulating HDL-C levels.....60

**Supplementary Table 1. Descriptive characteristics of the genome-wide association studies (GWAS) that were included in our Mendelian randomization analysis.**

| <b>GWAS</b>                        | <b>Phenotype</b>                                                           | <b>Sample size</b>             | <b>Ancestry</b>            | <b>Adjustments<sup>a</sup></b> |
|------------------------------------|----------------------------------------------------------------------------|--------------------------------|----------------------------|--------------------------------|
| <b><i>Instrument selection</i></b> |                                                                            |                                |                            |                                |
| GLGC & MVP                         | HDL-C, LDL-C, TG                                                           | 617,303 individuals            | Multi-ancestry             | age, age <sup>2</sup> , sex    |
| GLGC                               | HDL-C, LDL-C, TG (for lipid-modifying drug targets & sensitivity analyses) | 188,577 individuals            | Multi-ancestry             | age, age <sup>2</sup> , sex    |
| NMR-measured metabolite GWAS       | Lipoprotein particle components                                            | 24,925 individuals             | European                   | age, sex, time from last meal  |
| <b><i>Examined outcomes</i></b>    |                                                                            |                                |                            |                                |
| MEGASTROKE                         | Small vessel stroke                                                        | 11,710 cases; 287,067 controls | Multi-ancestry<br>European | age, sex                       |
| UK Biobank                         | WMH volume                                                                 | 10,597 individuals             | (White British)            | age, sex                       |
| ISGC ICH                           | ICH and subtypes (lobar, deep ICH)                                         | 1,537 cases/<br>1,490 controls | European                   | age, sex                       |

<sup>a</sup> All GWAS studies have further adjusted for principal components.

*Abbreviations.* GLGC, global lipids genetics consortium; HDL-C, high-density lipoprotein cholesterol; LDL-C, low-density lipoprotein cholesterol; MVP, Million Veteran Program; NMR, Nuclear Magnetic Resonance; TG, triglycerides.

**Supplementary Table 2. Genetic instruments for blood lipid levels selected from the meta-analyzed datasets of the Million Veterans Program (MVP) and the Global Lipids Genetics Consortium (GLGC).**

| Phenotype | SNP        | Chr | Position (hg18) | Eff_allele | Effect | SE    | P-value  | R2     | F     |
|-----------|------------|-----|-----------------|------------|--------|-------|----------|--------|-------|
| HDL-C     | rs1767141  | 1   | 23734350        | a          | 0.026  | 0.004 | 1.4E-10  | 0.0001 | 64.5  |
| HDL-C     | rs6668958  | 1   | 26902388        | t          | 0.020  | 0.003 | 2.3E-12  | 0.0001 | 81.0  |
| HDL-C     | rs17162330 | 1   | 27236212        | t          | 0.041  | 0.003 | 1.5E-35  | 0.0004 | 258.0 |
| HDL-C     | rs12144891 | 1   | 28344980        | a          | 0.017  | 0.003 | 1.3E-10  | 0.0001 | 69.4  |
| HDL-C     | rs4660293  | 1   | 40028180        | a          | 0.040  | 0.002 | 2.5E-62  | 0.0006 | 342.9 |
| HDL-C     | rs1168089  | 1   | 63113719        | t          | 0.015  | 0.002 | 1.8E-10  | 0.0001 | 63.6  |
| HDL-C     | rs4847399  | 1   | 93584606        | a          | 0.022  | 0.002 | 8.3E-25  | 0.0002 | 136.2 |
| HDL-C     | rs2878349  | 1   | 107549245       | a          | 0.015  | 0.003 | 2.1E-09  | 0.0001 | 61.3  |
| HDL-C     | rs12740374 | 1   | 109817590       | t          | 0.045  | 0.002 | 9.6E-79  | 0.0007 | 430.3 |
| HDL-C     | rs7550711  | 1   | 110082886       | t          | 0.049  | 0.006 | 1.6E-16  | 0.0001 | 82.5  |
| HDL-C     | rs28362581 | 1   | 110163879       | a          | 0.028  | 0.004 | 4.0E-13  | 0.0001 | 67.1  |
| HDL-C     | rs333947   | 1   | 110470764       | a          | 0.027  | 0.003 | 4.3E-15  | 0.0002 | 113.6 |
| HDL-C     | rs267738   | 1   | 150940625       | t          | 0.024  | 0.003 | 9.9E-22  | 0.0002 | 109.5 |
| HDL-C     | rs12145743 | 1   | 156700651       | t          | 0.014  | 0.002 | 2.0E-10  | 0.0001 | 53.0  |
| HDL-C     | rs1011731  | 1   | 172346548       | a          | 0.013  | 0.002 | 1.9E-11  | 0.0001 | 54.5  |
| HDL-C     | rs4650994  | 1   | 178515312       | a          | 0.019  | 0.002 | 4.7E-22  | 0.0002 | 115.1 |
| HDL-C     | rs2243976  | 1   | 182157235       | a          | 0.029  | 0.002 | 2.0E-33  | 0.0004 | 234.2 |
| HDL-C     | rs16856110 | 1   | 205631767       | a          | 0.020  | 0.003 | 5.0E-10  | 0.0001 | 84.0  |
| HDL-C     | rs6694509  | 1   | 219631981       | t          | 0.019  | 0.002 | 2.6E-17  | 0.0002 | 111.2 |
| HDL-C     | rs2807834  | 1   | 220970593       | t          | 0.024  | 0.003 | 1.8E-21  | 0.0002 | 145.1 |
| HDL-C     | rs4846914  | 1   | 230295691       | a          | 0.047  | 0.002 | 9.2E-110 | 0.0011 | 663.0 |
| HDL-C     | rs1043900  | 1   | 230416744       | a          | 0.023  | 0.003 | 8.3E-16  | 0.0002 | 109.6 |
| HDL-C     | rs558971   | 1   | 234853406       | a          | 0.014  | 0.002 | 8.1E-09  | 0.0001 | 59.1  |
| HDL-C     | rs11553746 | 2   | 272203          | t          | 0.016  | 0.002 | 5.7E-14  | 0.0001 | 68.7  |
| HDL-C     | rs2867125  | 2   | 622827          | t          | 0.017  | 0.003 | 3.2E-11  | 0.0001 | 52.4  |
| HDL-C     | rs4850047  | 2   | 3634753         | t          | 0.020  | 0.003 | 1.0E-09  | 0.0001 | 63.3  |
| HDL-C     | rs676210   | 2   | 21231524        | a          | 0.062  | 0.002 | 4.7E-143 | 0.0013 | 787.0 |
| HDL-C     | rs562338   | 2   | 21288321        | a          | 0.018  | 0.003 | 1.8E-12  | 0.0001 | 60.7  |
| HDL-C     | rs36020289 | 2   | 53992622        | c          | 0.046  | 0.008 | 2.0E-09  | 0.0001 | 43.0  |
| HDL-C     | rs12990465 | 2   | 65281401        | t          | 0.026  | 0.003 | 1.9E-18  | 0.0003 | 164.3 |
| HDL-C     | rs13389219 | 2   | 165528876       | t          | 0.033  | 0.002 | 1.2E-54  | 0.0005 | 314.9 |
| HDL-C     | rs6435161  | 2   | 203519783       | t          | 0.018  | 0.002 | 1.6E-13  | 0.0001 | 82.2  |
| HDL-C     | rs2943641  | 2   | 227093745       | t          | 0.039  | 0.002 | 2.5E-77  | 0.0007 | 427.1 |
| HDL-C     | rs11712666 | 3   | 11619958        | a          | 0.014  | 0.002 | 1.0E-09  | 0.0001 | 60.7  |
| HDL-C     | rs2067819  | 3   | 12359049        | a          | 0.021  | 0.003 | 5.6E-14  | 0.0002 | 93.9  |
| HDL-C     | rs2292101  | 3   | 12434901        | t          | 0.044  | 0.007 | 1.8E-11  | 0.0002 | 95.1  |
| HDL-C     | rs6777217  | 3   | 36979042        | a          | 0.013  | 0.002 | 1.1E-10  | 0.0001 | 51.0  |
| HDL-C     | rs2305637  | 3   | 47045846        | t          | 0.026  | 0.003 | 1.1E-19  | 0.0002 | 119.1 |
| HDL-C     | rs6762477  | 3   | 50093209        | a          | 0.023  | 0.002 | 2.1E-28  | 0.0003 | 162.8 |
| HDL-C     | rs13326165 | 3   | 52532118        | a          | 0.021  | 0.003 | 1.3E-16  | 0.0001 | 89.4  |
| HDL-C     | rs11242    | 3   | 53125922        | t          | 0.015  | 0.002 | 2.3E-10  | 0.0001 | 68.0  |
| HDL-C     | rs35000036 | 3   | 123190731       | t          | 0.013  | 0.002 | 3.3E-10  | 0.0001 | 50.5  |
| HDL-C     | rs1279840  | 3   | 136006576       | t          | 0.028  | 0.003 | 3.4E-25  | 0.0003 | 177.9 |
| HDL-C     | rs3773910  | 3   | 152171870       | c          | 0.017  | 0.003 | 4.1E-10  | 0.0001 | 65.9  |
| HDL-C     | rs900399   | 3   | 156798732       | a          | 0.021  | 0.002 | 1.4E-26  | 0.0002 | 134.2 |

|       |             |   |           |   |       |       |         |        |       |
|-------|-------------|---|-----------|---|-------|-------|---------|--------|-------|
| HDL-C | rs7633675   | 3 | 185510613 | t | 0.013 | 0.002 | 2.2E-10 | 0.0001 | 49.0  |
| HDL-C | rs4234589   | 3 | 185818882 | a | 0.022 | 0.003 | 6.2E-11 | 0.0001 | 72.3  |
| HDL-C | rs11248051  | 4 | 858332    | t | 0.019 | 0.003 | 8.5E-09 | 0.0001 | 40.8  |
| HDL-C | rs10019888  | 4 | 26062990  | a | 0.024 | 0.003 | 4.6E-15 | 0.0002 | 102.8 |
| HDL-C | rs293429    | 4 | 69591612  | t | 0.013 | 0.002 | 1.5E-09 | 0.0001 | 45.5  |
| HDL-C | rs10023050  | 4 | 88064431  | a | 0.015 | 0.002 | 3.7E-11 | 0.0001 | 68.9  |
| HDL-C | rs3822072   | 4 | 89741269  | a | 0.021 | 0.002 | 1.4E-20 | 0.0002 | 141.0 |
| HDL-C | rs2602836   | 4 | 100014805 | a | 0.013 | 0.002 | 2.0E-10 | 0.0001 | 48.7  |
| HDL-C | rs112519623 | 4 | 103184239 | a | 0.047 | 0.008 | 8.8E-09 | 0.0001 | 39.8  |
| HDL-C | rs13107325  | 4 | 103188709 | t | 0.078 | 0.004 | 6.3E-80 | 0.0009 | 540.0 |
| HDL-C | rs6855363   | 4 | 157670537 | t | 0.019 | 0.002 | 1.3E-14 | 0.0002 | 93.2  |
| HDL-C | rs7735253   | 5 | 53297611  | a | 0.021 | 0.003 | 6.5E-16 | 0.0002 | 105.7 |
| HDL-C | rs459193    | 5 | 55806751  | a | 0.026 | 0.002 | 9.2E-33 | 0.0003 | 168.5 |
| HDL-C | rs9686661   | 5 | 55861786  | t | 0.034 | 0.003 | 3.5E-42 | 0.0004 | 229.0 |
| HDL-C | rs4976033   | 5 | 67714246  | a | 0.013 | 0.002 | 1.8E-11 | 0.0001 | 55.1  |
| HDL-C | rs10057967  | 5 | 74997756  | t | 0.021 | 0.003 | 2.8E-14 | 0.0002 | 121.3 |
| HDL-C | rs4705986   | 5 | 132349654 | t | 0.035 | 0.006 | 2.0E-09 | 0.0001 | 87.9  |
| HDL-C | rs390299    | 5 | 153363334 | a | 0.015 | 0.002 | 4.6E-12 | 0.0001 | 60.4  |
| HDL-C | rs2434612   | 5 | 158022041 | a | 0.023 | 0.003 | 8.1E-16 | 0.0002 | 104.0 |
| HDL-C | rs7730898   | 5 | 170459675 | a | 0.018 | 0.003 | 1.9E-12 | 0.0001 | 81.4  |
| HDL-C | rs1265099   | 6 | 31105413  | a | 0.017 | 0.002 | 1.2E-16 | 0.0001 | 86.2  |
| HDL-C | rs184070214 | 6 | 31526080  | a | 0.045 | 0.007 | 1.5E-09 | 0.0001 | 46.8  |
| HDL-C | rs9332739   | 6 | 31903804  | c | 0.029 | 0.005 | 1.8E-09 | 0.0001 | 43.9  |
| HDL-C | rs3135006   | 6 | 32667119  | t | 0.019 | 0.003 | 3.0E-13 | 0.0001 | 84.9  |
| HDL-C | rs2894342   | 6 | 33774394  | a | 0.015 | 0.002 | 1.3E-09 | 0.0001 | 46.4  |
| HDL-C | rs1759645   | 6 | 34194866  | t | 0.024 | 0.003 | 3.3E-13 | 0.0002 | 97.4  |
| HDL-C | rs16885998  | 6 | 34268107  | t | 0.051 | 0.006 | 3.0E-16 | 0.0002 | 138.8 |
| HDL-C | rs11755393  | 6 | 34824636  | a | 0.030 | 0.002 | 5.9E-45 | 0.0004 | 262.9 |
| HDL-C | rs41270076  | 6 | 35467891  | t | 0.039 | 0.006 | 6.2E-10 | 0.0001 | 48.2  |
| HDL-C | rs4711698   | 6 | 41987451  | t | 0.018 | 0.003 | 2.8E-11 | 0.0001 | 76.4  |
| HDL-C | rs2274517   | 6 | 42932715  | t | 0.016 | 0.002 | 1.4E-11 | 0.0001 | 74.5  |
| HDL-C | rs6905288   | 6 | 43758873  | a | 0.030 | 0.002 | 5.5E-49 | 0.0004 | 262.8 |
| HDL-C | rs35349911  | 6 | 43785255  | t | 0.014 | 0.002 | 1.0E-11 | 0.0001 | 57.9  |
| HDL-C | rs881858    | 6 | 43806609  | a | 0.014 | 0.002 | 9.5E-11 | 0.0001 | 49.3  |
| HDL-C | rs2754820   | 6 | 109246891 | a | 0.020 | 0.003 | 3.1E-09 | 0.0001 | 76.6  |
| HDL-C | rs884366    | 6 | 109574095 | a | 0.014 | 0.002 | 8.1E-11 | 0.0001 | 54.0  |
| HDL-C | rs3756772   | 6 | 116325142 | t | 0.013 | 0.002 | 1.6E-10 | 0.0001 | 49.4  |
| HDL-C | rs2745353   | 6 | 127452935 | t | 0.020 | 0.002 | 6.5E-24 | 0.0002 | 125.5 |
| HDL-C | rs6925103   | 6 | 137076010 | t | 0.012 | 0.002 | 1.3E-09 | 0.0001 | 45.5  |
| HDL-C | rs643381    | 6 | 139839423 | a | 0.021 | 0.002 | 2.5E-25 | 0.0002 | 133.5 |
| HDL-C | rs41272114  | 6 | 161006077 | t | 0.066 | 0.006 | 3.4E-27 | 0.0003 | 181.0 |
| HDL-C | rs1652507   | 6 | 161082461 | t | 0.046 | 0.003 | 9.6E-51 | 0.0006 | 365.4 |
| HDL-C | rs1997243   | 7 | 1083777   | a | 0.022 | 0.003 | 2.2E-15 | 0.0001 | 80.2  |
| HDL-C | rs2303361   | 7 | 6449496   | t | 0.024 | 0.002 | 4.1E-23 | 0.0002 | 118.6 |
| HDL-C | rs10282707  | 7 | 17911038  | t | 0.026 | 0.002 | 7.6E-32 | 0.0003 | 200.3 |
| HDL-C | rs1534696   | 7 | 26397239  | a | 0.019 | 0.003 | 1.3E-13 | 0.0002 | 104.1 |
| HDL-C | rs2726070   | 7 | 36170883  | a | 0.017 | 0.003 | 2.0E-10 | 0.0001 | 90.4  |
| HDL-C | rs4917014   | 7 | 50305863  | t | 0.014 | 0.002 | 5.0E-11 | 0.0001 | 50.2  |

|       |             |    |           |   |       |       |          |        |        |
|-------|-------------|----|-----------|---|-------|-------|----------|--------|--------|
| HDL-C | rs1178979   | 7  | 72856430  | t | 0.034 | 0.003 | 6.2E-41  | 0.0003 | 206.0  |
| HDL-C | rs11556924  | 7  | 129663496 | t | 0.013 | 0.002 | 2.0E-09  | 0.0001 | 44.8   |
| HDL-C | rs972283    | 7  | 130466854 | a | 0.028 | 0.002 | 2.9E-43  | 0.0004 | 233.6  |
| HDL-C | rs3735080   | 7  | 150217309 | t | 0.014 | 0.002 | 2.7E-09  | 0.0001 | 41.1   |
| HDL-C | rs7787577   | 7  | 150521026 | a | 0.031 | 0.005 | 8.3E-12  | 0.0002 | 102.0  |
| HDL-C | rs11774381  | 8  | 9183339   | t | 0.028 | 0.003 | 5.1E-24  | 0.0003 | 192.0  |
| HDL-C | rs4841132   | 8  | 9183596   | a | 0.108 | 0.003 | 1.9E-215 | 0.0020 | 1207.7 |
| HDL-C | rs9657541   | 8  | 10643164  | t | 0.025 | 0.003 | 3.6E-17  | 0.0002 | 124.0  |
| HDL-C | rs1801177   | 8  | 19805708  | a | 0.120 | 0.009 | 2.3E-44  | 0.0005 | 324.7  |
| HDL-C | rs264       | 8  | 19813180  | a | 0.033 | 0.003 | 6.1E-23  | 0.0003 | 161.6  |
| HDL-C | rs268       | 8  | 19813529  | a | 0.238 | 0.008 | 5.5E-213 | 0.0018 | 1108.5 |
| HDL-C | rs13702     | 8  | 19824492  | t | 0.059 | 0.005 | 4.4E-32  | 0.0014 | 890.5  |
| HDL-C | rs17091872  | 8  | 19831977  | a | 0.056 | 0.004 | 2.6E-36  | 0.0009 | 573.9  |
| HDL-C | rs2410622   | 8  | 19854773  | t | 0.026 | 0.004 | 1.4E-10  | 0.0002 | 113.1  |
| HDL-C | rs6983170   | 8  | 19860161  | t | 0.093 | 0.010 | 5.6E-19  | 0.0005 | 281.3  |
| HDL-C | rs6651485   | 8  | 19861854  | a | 0.054 | 0.004 | 1.9E-36  | 0.0011 | 650.1  |
| HDL-C | rs2083637   | 8  | 19865175  | a | 0.048 | 0.005 | 3.5E-22  | 0.0009 | 557.7  |
| HDL-C | rs7837677   | 8  | 19889872  | t | 0.034 | 0.004 | 3.8E-16  | 0.0005 | 317.9  |
| HDL-C | rs10106652  | 8  | 19928160  | a | 0.031 | 0.005 | 4.6E-11  | 0.0004 | 230.1  |
| HDL-C | rs34859606  | 8  | 19930682  | c | 0.019 | 0.003 | 9.0E-09  | 0.0001 | 70.4   |
| HDL-C | rs6586892   | 8  | 19941145  | a | 0.036 | 0.004 | 5.5E-22  | 0.0006 | 377.0  |
| HDL-C | rs6983999   | 8  | 19955920  | a | 0.024 | 0.003 | 2.3E-15  | 0.0003 | 176.9  |
| HDL-C | rs4512408   | 8  | 71099094  | t | 0.026 | 0.004 | 5.5E-12  | 0.0001 | 80.8   |
| HDL-C | rs2957447   | 8  | 106357374 | a | 0.014 | 0.002 | 8.9E-09  | 0.0001 | 58.2   |
| HDL-C | rs2293889   | 8  | 116599199 | t | 0.030 | 0.002 | 2.7E-52  | 0.0004 | 275.0  |
| HDL-C | rs4871137   | 8  | 121868551 | t | 0.021 | 0.002 | 4.4E-22  | 0.0002 | 127.3  |
| HDL-C | rs17405319  | 8  | 126449406 | t | 0.025 | 0.003 | 9.0E-16  | 0.0002 | 110.9  |
| HDL-C | rs2954026   | 8  | 126484526 | t | 0.049 | 0.002 | 1.3E-108 | 0.0010 | 622.1  |
| HDL-C | rs581080    | 9  | 15305378  | c | 0.037 | 0.003 | 1.5E-49  | 0.0004 | 266.9  |
| HDL-C | rs13292026  | 9  | 107557315 | a | 0.044 | 0.007 | 4.9E-09  | 0.0001 | 66.2   |
| HDL-C | rs2230808   | 9  | 107562804 | t | 0.024 | 0.002 | 3.8E-23  | 0.0002 | 129.8  |
| HDL-C | rs76881554  | 9  | 107578620 | a | 0.164 | 0.025 | 3.4E-11  | 0.0001 | 56.4   |
| HDL-C | rs2066714   | 9  | 107586753 | t | 0.051 | 0.003 | 3.5E-69  | 0.0006 | 398.0  |
| HDL-C | rs3905000   | 9  | 107657070 | a | 0.055 | 0.003 | 6.8E-56  | 0.0008 | 477.7  |
| HDL-C | rs10120087  | 9  | 107661150 | a | 0.044 | 0.004 | 1.5E-26  | 0.0004 | 228.8  |
| HDL-C | rs1800978   | 9  | 107665978 | c | 0.057 | 0.004 | 3.7E-52  | 0.0007 | 460.3  |
| HDL-C | rs13284054  | 9  | 107669073 | t | 0.054 | 0.005 | 1.5E-27  | 0.0006 | 375.3  |
| HDL-C | rs1800977   | 9  | 107690450 | a | 0.026 | 0.003 | 3.2E-24  | 0.0003 | 186.2  |
| HDL-C | rs10733608  | 9  | 117148430 | t | 0.014 | 0.002 | 6.3E-09  | 0.0001 | 59.9   |
| HDL-C | rs635634    | 9  | 136155000 | t | 0.015 | 0.003 | 6.6E-09  | 0.0001 | 40.9   |
| HDL-C | rs11255744  | 10 | 8601074   | t | 0.018 | 0.003 | 1.3E-09  | 0.0001 | 80.4   |
| HDL-C | rs10904908  | 10 | 17260290  | a | 0.012 | 0.002 | 4.1E-09  | 0.0001 | 42.0   |
| HDL-C | rs970548    | 10 | 46013277  | a | 0.025 | 0.002 | 1.7E-26  | 0.0002 | 137.0  |
| HDL-C | rs2068888   | 10 | 94839642  | a | 0.021 | 0.002 | 1.1E-24  | 0.0002 | 128.9  |
| HDL-C | rs2862954   | 10 | 101912064 | t | 0.017 | 0.002 | 6.0E-18  | 0.0001 | 90.6   |
| HDL-C | rs2792751   | 10 | 113940329 | t | 0.028 | 0.002 | 2.5E-36  | 0.0003 | 197.6  |
| HDL-C | rs2148489   | 10 | 114048792 | t | 0.022 | 0.003 | 1.8E-15  | 0.0002 | 108.0  |
| HDL-C | rs7076938   | 10 | 115789375 | t | 0.017 | 0.002 | 5.2E-15  | 0.0001 | 73.1   |
| HDL-C | rs140201358 | 11 | 823586    | c | 0.052 | 0.009 | 2.8E-09  | 0.0001 | 43.3   |

|       |             |    |           |   |       |       |          |        |        |
|-------|-------------|----|-----------|---|-------|-------|----------|--------|--------|
| HDL-C | rs16928809  | 11 | 2936952   | a | 0.025 | 0.004 | 7.7E-12  | 0.0001 | 62.1   |
| HDL-C | rs6486121   | 11 | 13355770  | t | 0.015 | 0.002 | 2.5E-10  | 0.0001 | 65.3   |
| HDL-C | rs2303975   | 11 | 14276999  | a | 0.019 | 0.003 | 1.4E-10  | 0.0001 | 49.5   |
| HDL-C | rs925946    | 11 | 27667202  | t | 0.012 | 0.002 | 6.6E-09  | 0.0001 | 37.8   |
| HDL-C | rs7927401   | 11 | 32481177  | t | 0.021 | 0.003 | 1.2E-11  | 0.0002 | 98.1   |
| HDL-C | rs3824866   | 11 | 47258853  | t | 0.033 | 0.004 | 4.4E-19  | 0.0003 | 178.2  |
| HDL-C | rs326214    | 11 | 47298360  | a | 0.025 | 0.003 | 1.0E-20  | 0.0003 | 162.9  |
| HDL-C | rs10838738  | 11 | 47663049  | a | 0.019 | 0.002 | 1.6E-17  | 0.0002 | 103.0  |
| HDL-C | rs61897793  | 11 | 61599347  | a | 0.024 | 0.004 | 3.7E-09  | 0.0002 | 98.3   |
| HDL-C | rs174583    | 11 | 61609750  | t | 0.042 | 0.002 | 1.1E-68  | 0.0008 | 498.3  |
| HDL-C | rs35169799  | 11 | 64031241  | t | 0.040 | 0.004 | 5.0E-22  | 0.0002 | 109.7  |
| HDL-C | rs644740    | 11 | 65561468  | t | 0.016 | 0.002 | 3.9E-12  | 0.0001 | 78.0   |
| HDL-C | rs622082    | 11 | 68703959  | a | 0.015 | 0.002 | 1.6E-13  | 0.0001 | 63.3   |
| HDL-C | rs499974    | 11 | 75455021  | a | 0.025 | 0.003 | 1.5E-22  | 0.0002 | 116.6  |
| HDL-C | rs746463    | 11 | 109995944 | t | 0.017 | 0.002 | 6.3E-14  | 0.0001 | 71.9   |
| HDL-C | rs180349    | 11 | 116611827 | a | 0.017 | 0.003 | 1.8E-10  | 0.0001 | 75.4   |
| HDL-C | rs10488698  | 11 | 116633947 | a | 0.045 | 0.004 | 1.2E-25  | 0.0002 | 131.4  |
| HDL-C | rs964184    | 11 | 116648917 | c | 0.132 | 0.003 | 0.0E+00  | 0.0044 | 2730.3 |
| HDL-C | rs138326449 | 11 | 116701354 | a | 0.716 | 0.026 | 2.1E-170 | 0.0031 | 1896.5 |
| HDL-C | rs138407155 | 11 | 116707044 | a | 0.356 | 0.042 | 2.4E-17  | 0.0002 | 93.6   |
| HDL-C | rs12281729  | 11 | 116838130 | a | 0.077 | 0.005 | 3.5E-49  | 0.0007 | 402.5  |
| HDL-C | rs10892063  | 11 | 116896155 | a | 0.042 | 0.003 | 9.4E-45  | 0.0008 | 515.0  |
| HDL-C | rs12269901  | 11 | 116973929 | c | 0.027 | 0.003 | 3.3E-23  | 0.0003 | 191.3  |
| HDL-C | rs593245    | 11 | 117183650 | t | 0.015 | 0.002 | 2.0E-09  | 0.0001 | 64.9   |
| HDL-C | rs7941030   | 11 | 122522375 | t | 0.023 | 0.002 | 3.3E-30  | 0.0002 | 151.4  |
| HDL-C | rs4937122   | 11 | 126228659 | t | 0.032 | 0.004 | 6.0E-13  | 0.0002 | 93.7   |
| HDL-C | rs7134375   | 12 | 20473758  | a | 0.022 | 0.002 | 6.2E-27  | 0.0002 | 139.1  |
| HDL-C | rs7134150   | 12 | 20591332  | a | 0.031 | 0.005 | 6.3E-11  | 0.0001 | 76.1   |
| HDL-C | rs4963975   | 12 | 26443030  | a | 0.020 | 0.003 | 2.3E-13  | 0.0001 | 88.5   |
| HDL-C | rs1126930   | 12 | 49399132  | c | 0.037 | 0.006 | 2.9E-11  | 0.0001 | 52.5   |
| HDL-C | rs784563    | 12 | 53866619  | t | 0.015 | 0.002 | 3.1E-11  | 0.0001 | 71.5   |
| HDL-C | rs11613352  | 12 | 57792580  | t | 0.023 | 0.003 | 5.4E-17  | 0.0002 | 110.3  |
| HDL-C | rs2373459   | 12 | 101873956 | t | 0.016 | 0.002 | 2.9E-11  | 0.0001 | 70.2   |
| HDL-C | rs7298565   | 12 | 109937534 | a | 0.028 | 0.002 | 1.8E-44  | 0.0004 | 240.9  |
| HDL-C | rs3184504   | 12 | 111884608 | t | 0.024 | 0.002 | 5.0E-31  | 0.0003 | 182.5  |
| HDL-C | rs72650673  | 12 | 111885310 | a | 0.172 | 0.028 | 1.4E-09  | 0.0001 | 47.2   |
| HDL-C | rs1183910   | 12 | 121420807 | a | 0.013 | 0.002 | 1.7E-09  | 0.0001 | 43.1   |
| HDL-C | rs12369179  | 12 | 122963550 | t | 0.031 | 0.005 | 3.8E-10  | 0.0001 | 92.3   |
| HDL-C | rs1798192   | 12 | 123200768 | t | 0.019 | 0.002 | 3.6E-21  | 0.0002 | 113.5  |
| HDL-C | rs940904    | 12 | 123491572 | a | 0.023 | 0.003 | 1.8E-16  | 0.0002 | 121.0  |
| HDL-C | rs4759375   | 12 | 123796238 | t | 0.049 | 0.004 | 6.0E-35  | 0.0004 | 257.2  |
| HDL-C | rs12317176  | 12 | 124404718 | t | 0.022 | 0.002 | 5.2E-20  | 0.0002 | 141.9  |
| HDL-C | rs863750    | 12 | 124505444 | t | 0.017 | 0.002 | 3.1E-13  | 0.0001 | 88.0   |
| HDL-C | rs12230272  | 12 | 125083696 | a | 0.022 | 0.003 | 5.7E-11  | 0.0002 | 102.9  |
| HDL-C | rs838880    | 12 | 125261593 | t | 0.025 | 0.002 | 6.3E-31  | 0.0003 | 173.3  |
| HDL-C | rs10773105  | 12 | 125283766 | t | 0.026 | 0.002 | 3.6E-27  | 0.0003 | 201.1  |
| HDL-C | rs150728540 | 12 | 125292360 | a | 0.476 | 0.058 | 1.6E-16  | 0.0001 | 83.8   |
| HDL-C | rs5891      | 12 | 125299542 | t | 0.078 | 0.009 | 2.2E-18  | 0.0001 | 91.1   |
| HDL-C | rs7306660   | 12 | 125327384 | a | 0.029 | 0.002 | 2.4E-32  | 0.0004 | 232.8  |

|       |             |    |           |   |       |       |          |        |        |
|-------|-------------|----|-----------|---|-------|-------|----------|--------|--------|
| HDL-C | rs7298751   | 12 | 125380232 | a | 0.043 | 0.004 | 5.1E-32  | 0.0004 | 244.7  |
| HDL-C | rs17532301  | 13 | 41609047  | a | 0.027 | 0.005 | 3.4E-09  | 0.0001 | 59.4   |
| HDL-C | rs10483776  | 14 | 65914867  | a | 0.015 | 0.003 | 3.9E-09  | 0.0001 | 40.4   |
| HDL-C | rs8021180   | 14 | 70783943  | a | 0.014 | 0.002 | 3.3E-09  | 0.0001 | 61.9   |
| HDL-C | rs13379043  | 14 | 74250126  | t | 0.018 | 0.002 | 1.4E-15  | 0.0001 | 78.1   |
| HDL-C | rs4983559   | 14 | 105277209 | a | 0.025 | 0.002 | 2.2E-36  | 0.0003 | 190.0  |
| HDL-C | rs9944249   | 15 | 41847176  | t | 0.013 | 0.002 | 9.1E-09  | 0.0001 | 53.0   |
| HDL-C | rs55707100  | 15 | 43820717  | t | 0.093 | 0.006 | 3.1E-51  | 0.0004 | 277.0  |
| HDL-C | rs4622454   | 15 | 58646332  | t | 0.021 | 0.003 | 1.0E-14  | 0.0002 | 119.4  |
| HDL-C | rs4775041   | 15 | 58674695  | c | 0.039 | 0.004 | 9.1E-24  | 0.0006 | 381.0  |
| HDL-C | rs16940147  | 15 | 58676119  | a | 0.050 | 0.008 | 1.1E-09  | 0.0002 | 146.8  |
| HDL-C | rs117901517 | 15 | 58678869  | t | 0.038 | 0.006 | 3.2E-10  | 0.0002 | 111.4  |
| HDL-C | rs34718390  | 15 | 58682690  | a | 0.053 | 0.006 | 1.1E-18  | 0.0003 | 204.5  |
| HDL-C | rs1532085   | 15 | 58683366  | a | 0.062 | 0.004 | 2.9E-68  | 0.0018 | 1137.3 |
| HDL-C | rs7165077   | 15 | 58686809  | t | 0.027 | 0.004 | 8.5E-13  | 0.0002 | 104.1  |
| HDL-C | rs6494003   | 15 | 58690048  | a | 0.093 | 0.011 | 5.0E-18  | 0.0004 | 247.8  |
| HDL-C | rs16940233  | 15 | 58702941  | t | 0.048 | 0.006 | 7.0E-18  | 0.0003 | 198.5  |
| HDL-C | rs12912415  | 15 | 58721447  | a | 0.040 | 0.004 | 2.6E-25  | 0.0004 | 246.5  |
| HDL-C | rs6494006   | 15 | 58730571  | t | 0.044 | 0.006 | 1.7E-11  | 0.0002 | 145.5  |
| HDL-C | rs17301746  | 15 | 58731395  | t | 0.088 | 0.010 | 8.6E-20  | 0.0003 | 169.8  |
| HDL-C | rs936960    | 15 | 58751877  | t | 0.052 | 0.004 | 7.9E-32  | 0.0005 | 286.4  |
| HDL-C | rs1869138   | 15 | 58779039  | t | 0.028 | 0.004 | 3.1E-11  | 0.0001 | 88.4   |
| HDL-C | rs6083      | 15 | 58838010  | a | 0.016 | 0.003 | 5.0E-09  | 0.0001 | 77.0   |
| HDL-C | rs17269397  | 15 | 58857378  | a | 0.026 | 0.003 | 6.4E-18  | 0.0003 | 208.7  |
| HDL-C | rs424346    | 15 | 59010962  | t | 0.054 | 0.009 | 2.2E-09  | 0.0002 | 133.3  |
| HDL-C | rs181181625 | 15 | 59377940  | t | 0.348 | 0.033 | 1.3E-26  | 0.0003 | 208.9  |
| HDL-C | rs12148597  | 15 | 61955338  | a | 0.016 | 0.003 | 5.3E-09  | 0.0001 | 54.7   |
| HDL-C | rs34317102  | 15 | 63414083  | a | 0.019 | 0.002 | 1.5E-16  | 0.0001 | 80.0   |
| HDL-C | rs2228510   | 15 | 63970456  | t | 0.012 | 0.002 | 4.6E-09  | 0.0001 | 42.4   |
| HDL-C | rs139271800 | 15 | 90214777  | a | 0.248 | 0.037 | 3.2E-11  | 0.0001 | 53.2   |
| HDL-C | rs7202647   | 16 | 985891    | t | 0.017 | 0.003 | 4.6E-09  | 0.0001 | 70.1   |
| HDL-C | rs12928822  | 16 | 11403893  | t | 0.018 | 0.003 | 1.6E-10  | 0.0001 | 53.3   |
| HDL-C | rs1421085   | 16 | 53800954  | t | 0.028 | 0.002 | 3.4E-45  | 0.0004 | 236.0  |
| HDL-C | rs12929759  | 16 | 54410447  | a | 0.018 | 0.003 | 3.0E-13  | 0.0001 | 89.4   |
| HDL-C | rs4238772   | 16 | 55029160  | a | 0.029 | 0.005 | 1.2E-09  | 0.0001 | 84.2   |
| HDL-C | rs8044753   | 16 | 56883438  | a | 0.025 | 0.003 | 3.9E-19  | 0.0003 | 189.0  |
| HDL-C | rs36049418  | 16 | 56921840  | a | 0.066 | 0.009 | 1.4E-14  | 0.0002 | 101.5  |
| HDL-C | rs11648751  | 16 | 56937262  | t | 0.030 | 0.004 | 1.0E-11  | 0.0002 | 117.6  |
| HDL-C | rs37029     | 16 | 56949168  | a | 0.024 | 0.003 | 2.0E-21  | 0.0003 | 177.8  |
| HDL-C | rs9989419   | 16 | 56985139  | a | 0.034 | 0.002 | 1.4E-41  | 0.0005 | 334.5  |
| HDL-C | rs72786786  | 16 | 56985514  | a | 0.058 | 0.004 | 3.0E-40  | 0.0014 | 869.0  |
| HDL-C | rs76315536  | 16 | 56986976  | t | 0.161 | 0.016 | 1.1E-24  | 0.0005 | 290.3  |
| HDL-C | rs4783961   | 16 | 56994894  | a | 0.026 | 0.004 | 2.1E-12  | 0.0003 | 208.7  |
| HDL-C | rs1800775   | 16 | 56995236  | a | 0.032 | 0.005 | 3.7E-11  | 0.0005 | 310.2  |
| HDL-C | rs34065661  | 16 | 56995935  | c | 0.485 | 0.019 | 1.5E-138 | 0.0021 | 1273.2 |
| HDL-C | rs7203984   | 16 | 56999258  | a | 0.074 | 0.005 | 2.2E-56  | 0.0018 | 1104.4 |
| HDL-C | rs1532624   | 16 | 57005479  | a | 0.113 | 0.005 | 1.7E-121 | 0.0062 | 3859.4 |
| HDL-C | rs12708974  | 16 | 57005550  | t | 0.086 | 0.005 | 4.5E-73  | 0.0015 | 956.9  |
| HDL-C | rs5883      | 16 | 57007353  | t | 0.167 | 0.006 | 4.7E-186 | 0.0030 | 1877.3 |



|       |             |    |          |   |       |       |          |        |        |
|-------|-------------|----|----------|---|-------|-------|----------|--------|--------|
| HDL-C | rs289714    | 16 | 57007451 | a | 0.082 | 0.005 | 8.4E-70  | 0.0021 | 1312.3 |
| HDL-C | rs5880      | 16 | 57015091 | c | 0.138 | 0.005 | 1.5E-147 | 0.0018 | 1113.2 |
| HDL-C | rs506829    | 16 | 57383759 | t | 0.019 | 0.003 | 2.2E-09  | 0.0001 | 78.3   |
| HDL-C | rs16962034  | 16 | 60419220 | t | 0.016 | 0.003 | 6.2E-09  | 0.0001 | 72.5   |
| HDL-C | rs7202185   | 16 | 67714560 | a | 0.037 | 0.005 | 3.4E-14  | 0.0002 | 115.6  |
| HDL-C | rs16942887  | 16 | 67928042 | a | 0.074 | 0.003 | 3.1E-134 | 0.0012 | 765.1  |
| HDL-C | rs1345868   | 16 | 71669624 | a | 0.014 | 0.003 | 7.8E-09  | 0.0001 | 55.0   |
| HDL-C | rs12443634  | 16 | 81524274 | a | 0.031 | 0.003 | 2.0E-25  | 0.0004 | 244.8  |
| HDL-C | rs3803800   | 17 | 7462969  | a | 0.013 | 0.002 | 5.7E-09  | 0.0001 | 40.4   |
| HDL-C | rs2071379   | 17 | 26695832 | a | 0.014 | 0.002 | 5.1E-10  | 0.0001 | 61.3   |
| HDL-C | rs11078915  | 17 | 37715426 | t | 0.027 | 0.004 | 6.4E-13  | 0.0003 | 157.4  |
| HDL-C | rs11869286  | 17 | 37813856 | c | 0.024 | 0.003 | 1.8E-18  | 0.0003 | 161.7  |
| HDL-C | rs11556624  | 17 | 37815304 | c | 0.087 | 0.007 | 8.9E-37  | 0.0003 | 213.2  |
| HDL-C | rs4794822   | 17 | 38156712 | t | 0.018 | 0.002 | 1.9E-16  | 0.0001 | 91.1   |
| HDL-C | rs72836561  | 17 | 41926126 | t | 0.187 | 0.006 | 7.6E-228 | 0.0021 | 1293.7 |
| HDL-C | rs231539    | 17 | 41942109 | t | 0.036 | 0.004 | 4.2E-23  | 0.0004 | 221.1  |
| HDL-C | rs17679445  | 17 | 46022065 | a | 0.030 | 0.004 | 6.1E-13  | 0.0001 | 66.0   |
| HDL-C | rs11652146  | 17 | 47422363 | a | 0.017 | 0.003 | 6.6E-12  | 0.0001 | 78.1   |
| HDL-C | rs12602912  | 17 | 65870073 | t | 0.018 | 0.002 | 2.2E-13  | 0.0001 | 59.4   |
| HDL-C | rs10852765  | 17 | 66884879 | a | 0.016 | 0.002 | 1.1E-11  | 0.0001 | 73.8   |
| HDL-C | rs2292642   | 17 | 76395430 | t | 0.032 | 0.002 | 1.6E-55  | 0.0005 | 297.9  |
| HDL-C | rs2289750   | 17 | 76437343 | a | 0.028 | 0.005 | 6.5E-09  | 0.0001 | 77.2   |
| HDL-C | rs1788783   | 18 | 21161134 | t | 0.015 | 0.002 | 7.0E-11  | 0.0001 | 69.4   |
| HDL-C | rs8093249   | 18 | 47097398 | a | 0.034 | 0.004 | 9.5E-22  | 0.0003 | 184.7  |
| HDL-C | rs77960347  | 18 | 47109955 | a | 0.250 | 0.009 | 7.7E-166 | 0.0017 | 1033.2 |
| HDL-C | rs117623631 | 18 | 47113165 | t | 0.343 | 0.025 | 1.0E-41  | 0.0005 | 333.8  |
| HDL-C | rs3786248   | 18 | 47118219 | t | 0.059 | 0.006 | 2.8E-26  | 0.0004 | 221.8  |
| HDL-C | rs7241918   | 18 | 47160953 | t | 0.074 | 0.003 | 4.3E-120 | 0.0015 | 902.9  |
| HDL-C | rs4939886   | 18 | 47176793 | a | 0.020 | 0.003 | 8.8E-10  | 0.0002 | 110.5  |
| HDL-C | rs11660468  | 18 | 47209143 | t | 0.025 | 0.002 | 1.2E-25  | 0.0003 | 190.2  |
| HDL-C | rs9956279   | 18 | 57942799 | t | 0.017 | 0.003 | 1.0E-10  | 0.0001 | 71.5   |
| HDL-C | rs12975319  | 19 | 3414088  | a | 0.015 | 0.003 | 3.7E-09  | 0.0001 | 62.1   |
| HDL-C | rs10408844  | 19 | 7244884  | t | 0.018 | 0.003 | 5.2E-10  | 0.0001 | 63.6   |
| HDL-C | rs4804833   | 19 | 7970635  | a | 0.015 | 0.002 | 4.9E-10  | 0.0001 | 66.5   |
| HDL-C | rs116843064 | 19 | 8429323  | a | 0.246 | 0.007 | 1.3E-252 | 0.0031 | 1913.2 |
| HDL-C | rs2913968   | 19 | 8467235  | t | 0.017 | 0.003 | 2.0E-10  | 0.0001 | 68.3   |
| HDL-C | rs6511720   | 19 | 11202306 | t | 0.020 | 0.003 | 1.1E-10  | 0.0001 | 49.4   |
| HDL-C | rs17616661  | 19 | 11303554 | a | 0.026 | 0.004 | 1.2E-12  | 0.0001 | 62.1   |
| HDL-C | rs737337    | 19 | 11347493 | t | 0.057 | 0.003 | 1.2E-62  | 0.0006 | 375.5  |
| HDL-C | rs2111504   | 19 | 32917455 | a | 0.017 | 0.003 | 1.4E-10  | 0.0001 | 48.1   |
| HDL-C | rs731839    | 19 | 33899065 | a | 0.018 | 0.002 | 2.4E-17  | 0.0001 | 89.5   |
| HDL-C | rs2075650   | 19 | 45395619 | a | 0.038 | 0.003 | 7.7E-28  | 0.0003 | 209.7  |
| HDL-C | rs77301115  | 19 | 45396973 | a | 0.066 | 0.009 | 2.0E-13  | 0.0002 | 134.3  |
| HDL-C | rs7412      | 19 | 45412079 | t | 0.086 | 0.004 | 3.0E-85  | 0.0011 | 650.4  |
| HDL-C | rs439401    | 19 | 45414451 | t | 0.014 | 0.002 | 7.9E-11  | 0.0001 | 58.3   |
| HDL-C | rs4420638   | 19 | 45422946 | a | 0.042 | 0.004 | 2.9E-29  | 0.0005 | 318.0  |
| HDL-C | rs5167      | 19 | 45448465 | t | 0.038 | 0.002 | 2.4E-78  | 0.0007 | 405.2  |
| HDL-C | rs8111071   | 19 | 46307406 | a | 0.028 | 0.004 | 1.1E-14  | 0.0001 | 72.3   |
| HDL-C | rs2303108   | 19 | 47589895 | t | 0.014 | 0.002 | 7.9E-11  | 0.0001 | 49.7   |

|       |            |    |           |   |       |       |          |        |        |
|-------|------------|----|-----------|---|-------|-------|----------|--------|--------|
| HDL-C | rs3752125  | 19 | 52327784  | t | 0.020 | 0.003 | 3.4E-16  | 0.0002 | 105.8  |
| HDL-C | rs12975366 | 19 | 54759361  | t | 0.021 | 0.002 | 1.4E-19  | 0.0002 | 132.8  |
| HDL-C | rs386000   | 19 | 54792761  | c | 0.044 | 0.003 | 5.7E-48  | 0.0006 | 395.1  |
| HDL-C | rs12979085 | 19 | 54837165  | a | 0.020 | 0.003 | 1.1E-12  | 0.0002 | 105.2  |
| HDL-C | rs1132274  | 20 | 17596155  | a | 0.016 | 0.003 | 3.9E-09  | 0.0001 | 42.6   |
| HDL-C | rs2268086  | 20 | 32648738  | a | 0.014 | 0.002 | 3.4E-09  | 0.0001 | 60.2   |
| HDL-C | rs1415771  | 20 | 33734493  | a | 0.013 | 0.002 | 1.9E-10  | 0.0001 | 51.3   |
| HDL-C | rs1800961  | 20 | 43042364  | t | 0.142 | 0.006 | 5.1E-137 | 0.0012 | 745.5  |
| HDL-C | rs3827066  | 20 | 44586023  | t | 0.050 | 0.004 | 4.2E-37  | 0.0007 | 413.4  |
| HDL-C | rs8123864  | 20 | 44598670  | t | 0.048 | 0.003 | 2.2E-55  | 0.0010 | 643.8  |
| HDL-C | rs1211644  | 20 | 45592842  | t | 0.018 | 0.003 | 3.2E-09  | 0.0001 | 73.7   |
| HDL-C | rs11700063 | 20 | 46153148  | a | 0.021 | 0.003 | 3.3E-14  | 0.0002 | 101.2  |
| HDL-C | rs4239651  | 20 | 46340596  | t | 0.021 | 0.003 | 8.4E-10  | 0.0001 | 82.2   |
| HDL-C | rs6025606  | 20 | 56098733  | t | 0.012 | 0.002 | 2.9E-09  | 0.0001 | 40.6   |
| HDL-C | rs310631   | 20 | 62196253  | a | 0.013 | 0.002 | 7.4E-09  | 0.0001 | 52.9   |
| HDL-C | rs6062343  | 20 | 62695931  | a | 0.014 | 0.002 | 7.6E-12  | 0.0001 | 57.7   |
| HDL-C | rs235314   | 21 | 46271452  | t | 0.015 | 0.002 | 7.2E-11  | 0.0001 | 69.0   |
| HDL-C | rs12482088 | 21 | 46901973  | a | 0.019 | 0.003 | 5.0E-10  | 0.0001 | 77.3   |
| HDL-C | rs181362   | 22 | 21932068  | t | 0.030 | 0.002 | 1.3E-36  | 0.0003 | 202.2  |
| HDL-C | rs4823006  | 22 | 29451671  | a | 0.013 | 0.002 | 9.1E-11  | 0.0001 | 51.4   |
| HDL-C | rs17738540 | 22 | 30888527  | t | 0.018 | 0.002 | 1.6E-14  | 0.0001 | 71.1   |
| HDL-C | rs738322   | 22 | 38569006  | a | 0.020 | 0.002 | 4.2E-23  | 0.0002 | 121.0  |
| HDL-C | rs738409   | 22 | 44324727  | c | 0.016 | 0.002 | 1.5E-11  | 0.0001 | 51.9   |
| LDL-C | rs2992753  | 1  | 18808292  | a | 0.012 | 0.002 | 3.9E-09  | 0.0001 | 44.0   |
| LDL-C | rs35172831 | 1  | 25850206  | t | 0.019 | 0.003 | 8.1E-12  | 0.0002 | 111.8  |
| LDL-C | rs12748152 | 1  | 27138393  | t | 0.026 | 0.004 | 7.6E-12  | 0.0001 | 57.3   |
| LDL-C | rs17111483 | 1  | 55485098  | t | 0.040 | 0.005 | 1.9E-16  | 0.0003 | 190.5  |
| LDL-C | rs11206510 | 1  | 55496039  | t | 0.068 | 0.003 | 2.7E-111 | 0.0013 | 832.9  |
| LDL-C | rs2479409  | 1  | 55504650  | a | 0.022 | 0.002 | 1.1E-22  | 0.0002 | 140.7  |
| LDL-C | rs11583680 | 1  | 55505668  | t | 0.027 | 0.004 | 1.9E-12  | 0.0002 | 105.8  |
| LDL-C | rs10888896 | 1  | 55509213  | c | 0.029 | 0.003 | 1.0E-20  | 0.0003 | 200.2  |
| LDL-C | rs693668   | 1  | 55521109  | a | 0.029 | 0.004 | 4.5E-15  | 0.0004 | 232.2  |
| LDL-C | rs562556   | 1  | 55524237  | a | 0.130 | 0.008 | 4.9E-61  | 0.0047 | 2926.2 |
| LDL-C | rs61739739 | 1  | 55548991  | t | 0.080 | 0.011 | 1.7E-12  | 0.0001 | 81.2   |
| LDL-C | rs1165222  | 1  | 55638075  | a | 0.135 | 0.008 | 1.7E-63  | 0.0047 | 2908.7 |
| LDL-C | rs1475701  | 1  | 55638546  | t | 0.068 | 0.006 | 1.8E-26  | 0.0003 | 211.8  |
| LDL-C | rs7551981  | 1  | 55719166  | t | 0.030 | 0.003 | 7.2E-27  | 0.0004 | 258.6  |
| LDL-C | rs10489488 | 1  | 55792722  | a | 0.093 | 0.011 | 5.3E-17  | 0.0002 | 152.8  |
| LDL-C | rs12742537 | 1  | 63346976  | a | 0.015 | 0.002 | 2.5E-14  | 0.0001 | 70.2   |
| LDL-C | rs10874746 | 1  | 93323971  | t | 0.015 | 0.002 | 2.3E-13  | 0.0001 | 66.4   |
| LDL-C | rs1730859  | 1  | 107617707 | a | 0.019 | 0.003 | 2.6E-13  | 0.0002 | 98.5   |
| LDL-C | rs12740374 | 1  | 109817590 | t | 0.160 | 0.002 | 0.0E+00  | 0.0086 | 5379.2 |
| LDL-C | rs4745     | 1  | 155106227 | a | 0.012 | 0.002 | 5.7E-10  | 0.0001 | 47.5   |
| LDL-C | rs867772   | 1  | 220972343 | a | 0.026 | 0.003 | 5.8E-19  | 0.0003 | 173.2  |
| LDL-C | rs558971   | 1  | 234853406 | a | 0.036 | 0.002 | 1.2E-51  | 0.0007 | 406.6  |
| LDL-C | rs1473886  | 2  | 20368519  | t | 0.015 | 0.002 | 2.1E-10  | 0.0001 | 65.9   |
| LDL-C | rs12710745 | 2  | 21112689  | a | 0.020 | 0.003 | 1.0E-14  | 0.0002 | 119.0  |
| LDL-C | rs6547409  | 2  | 21190209  | t | 0.095 | 0.006 | 8.9E-62  | 0.0009 | 573.7  |
| LDL-C | rs1801702  | 2  | 21225485  | c | 0.097 | 0.007 | 1.5E-47  | 0.0005 | 281.4  |

|       |            |   |           |   |       |       |          |        |        |
|-------|------------|---|-----------|---|-------|-------|----------|--------|--------|
| LDL-C | rs1042023  | 2 | 21229446  | c | 0.086 | 0.011 | 5.5E-15  | 0.0001 | 85.9   |
| LDL-C | rs12713843 | 2 | 21238367  | t | 0.188 | 0.016 | 8.2E-33  | 0.0003 | 191.3  |
| LDL-C | rs12713844 | 2 | 21238413  | c | 0.074 | 0.011 | 5.0E-12  | 0.0001 | 63.7   |
| LDL-C | rs679899   | 2 | 21250914  | a | 0.029 | 0.002 | 7.0E-37  | 0.0004 | 267.5  |
| LDL-C | rs515135   | 2 | 21286057  | t | 0.088 | 0.003 | 1.4E-202 | 0.0024 | 1489.3 |
| LDL-C | rs62122515 | 2 | 21295227  | a | 0.026 | 0.003 | 8.2E-14  | 0.0003 | 183.0  |
| LDL-C | rs4635554  | 2 | 21389659  | t | 0.022 | 0.003 | 2.9E-18  | 0.0002 | 133.9  |
| LDL-C | rs1260327  | 2 | 27711893  | a | 0.015 | 0.002 | 2.1E-11  | 0.0001 | 67.5   |
| LDL-C | rs814295   | 2 | 27743215  | a | 0.031 | 0.003 | 1.2E-19  | 0.0002 | 153.4  |
| LDL-C | rs11556157 | 2 | 44028013  | a | 0.020 | 0.002 | 2.0E-18  | 0.0002 | 94.7   |
| LDL-C | rs72796748 | 2 | 44080310  | t | 0.059 | 0.007 | 2.6E-19  | 0.0003 | 189.1  |
| LDL-C | rs4077440  | 2 | 44081042  | t | 0.117 | 0.005 | 1.1E-122 | 0.0067 | 4167.0 |
| LDL-C | rs6718187  | 2 | 44082362  | a | 0.070 | 0.005 | 2.0E-43  | 0.0024 | 1501.7 |
| LDL-C | rs4148218  | 2 | 44099582  | a | 0.060 | 0.003 | 7.7E-70  | 0.0011 | 676.7  |
| LDL-C | rs11125936 | 2 | 62871225  | t | 0.025 | 0.003 | 1.1E-13  | 0.0001 | 66.5   |
| LDL-C | rs10185855 | 2 | 101642260 | a | 0.014 | 0.002 | 8.9E-09  | 0.0001 | 55.2   |
| LDL-C | rs10490626 | 2 | 118835841 | a | 0.045 | 0.004 | 2.4E-30  | 0.0003 | 168.7  |
| LDL-C | rs1808458  | 2 | 118879253 | t | 0.031 | 0.005 | 2.6E-10  | 0.0001 | 74.7   |
| LDL-C | rs6706968  | 2 | 121310269 | a | 0.023 | 0.003 | 3.9E-16  | 0.0003 | 157.6  |
| LDL-C | rs2198562  | 2 | 158465673 | c | 0.035 | 0.006 | 2.9E-10  | 0.0001 | 68.8   |
| LDL-C | rs2287623  | 2 | 169830155 | a | 0.018 | 0.002 | 1.4E-19  | 0.0002 | 97.5   |
| LDL-C | rs6435161  | 2 | 203519783 | t | 0.024 | 0.003 | 4.3E-21  | 0.0002 | 146.1  |
| LDL-C | rs1048013  | 2 | 204154552 | t | 0.012 | 0.002 | 8.8E-10  | 0.0001 | 46.2   |
| LDL-C | rs887829   | 2 | 234668570 | t | 0.021 | 0.002 | 1.7E-22  | 0.0002 | 115.3  |
| LDL-C | rs7616006  | 3 | 12267648  | a | 0.022 | 0.002 | 2.3E-20  | 0.0002 | 149.7  |
| LDL-C | rs7640978  | 3 | 32533010  | t | 0.032 | 0.004 | 4.7E-20  | 0.0002 | 104.4  |
| LDL-C | rs2251219  | 3 | 52584787  | t | 0.014 | 0.002 | 7.6E-11  | 0.0001 | 54.9   |
| LDL-C | rs13315871 | 3 | 58381287  | a | 0.032 | 0.004 | 3.2E-19  | 0.0002 | 101.4  |
| LDL-C | rs1979848  | 3 | 132165178 | a | 0.026 | 0.004 | 2.3E-09  | 0.0001 | 69.6   |
| LDL-C | rs10513551 | 3 | 160086055 | t | 0.015 | 0.002 | 1.4E-10  | 0.0001 | 73.0   |
| LDL-C | rs3748034  | 4 | 3446091   | t | 0.018 | 0.003 | 2.4E-09  | 0.0001 | 49.1   |
| LDL-C | rs3816873  | 4 | 100504664 | t | 0.014 | 0.002 | 4.1E-09  | 0.0001 | 43.3   |
| LDL-C | rs13107325 | 4 | 103188709 | t | 0.029 | 0.004 | 9.9E-13  | 0.0001 | 76.5   |
| LDL-C | rs870992   | 5 | 52193237  | a | 0.027 | 0.004 | 1.8E-10  | 0.0001 | 71.5   |
| LDL-C | rs10062361 | 5 | 74565153  | t | 0.025 | 0.003 | 1.9E-13  | 0.0002 | 132.1  |
| LDL-C | rs3846662  | 5 | 74651084  | a | 0.057 | 0.002 | 2.1E-131 | 0.0016 | 980.6  |
| LDL-C | rs11955819 | 5 | 74782412  | a | 0.058 | 0.008 | 4.8E-13  | 0.0002 | 108.9  |
| LDL-C | rs4530754  | 5 | 122855416 | a | 0.016 | 0.002 | 1.8E-14  | 0.0001 | 79.1   |
| LDL-C | rs10065787 | 5 | 131436486 | t | 0.019 | 0.003 | 2.2E-09  | 0.0002 | 109.2  |
| LDL-C | rs2522056  | 5 | 131801726 | a | 0.018 | 0.002 | 1.2E-13  | 0.0001 | 70.1   |
| LDL-C | rs4704825  | 5 | 156382308 | a | 0.028 | 0.003 | 5.1E-25  | 0.0004 | 221.9  |
| LDL-C | rs2235215  | 6 | 16131156  | t | 0.025 | 0.003 | 1.8E-18  | 0.0003 | 163.8  |
| LDL-C | rs1800562  | 6 | 26093141  | a | 0.049 | 0.004 | 6.6E-29  | 0.0003 | 159.9  |
| LDL-C | rs129128   | 6 | 26125342  | t | 0.021 | 0.004 | 3.4E-09  | 0.0001 | 62.5   |
| LDL-C | rs2249741  | 6 | 31240712  | a | 0.020 | 0.003 | 7.8E-14  | 0.0002 | 126.2  |
| LDL-C | rs13192471 | 6 | 32671103  | t | 0.034 | 0.003 | 5.8E-33  | 0.0003 | 179.2  |
| LDL-C | rs3800406  | 6 | 35133074  | a | 0.028 | 0.004 | 1.1E-12  | 0.0002 | 95.6   |
| LDL-C | rs1129187  | 6 | 42932200  | t | 0.012 | 0.002 | 8.5E-10  | 0.0001 | 45.9   |

|       |             |    |           |   |       |       |          |        |        |
|-------|-------------|----|-----------|---|-------|-------|----------|--------|--------|
| LDL-C | rs2239619   | 6  | 52453220  | a | 0.016 | 0.002 | 4.0E-14  | 0.0001 | 73.3   |
| LDL-C | rs17789218  | 6  | 100600097 | t | 0.022 | 0.003 | 4.0E-16  | 0.0002 | 109.7  |
| LDL-C | rs9390698   | 6  | 101296389 | a | 0.013 | 0.002 | 1.3E-10  | 0.0001 | 50.0   |
| LDL-C | rs3798236   | 6  | 116309649 | t | 0.018 | 0.003 | 1.8E-13  | 0.0002 | 93.5   |
| LDL-C | rs9376090   | 6  | 135411228 | t | 0.028 | 0.002 | 5.6E-33  | 0.0003 | 172.8  |
| LDL-C | rs1044418   | 6  | 139229872 | t | 0.018 | 0.003 | 1.2E-10  | 0.0001 | 52.6   |
| LDL-C | rs12208357  | 6  | 160543148 | t | 0.062 | 0.004 | 2.7E-52  | 0.0005 | 319.8  |
| LDL-C | rs34130495  | 6  | 160560824 | a | 0.048 | 0.007 | 2.5E-13  | 0.0001 | 66.9   |
| LDL-C | rs62440901  | 6  | 160569068 | t | 0.036 | 0.004 | 1.1E-20  | 0.0003 | 199.5  |
| LDL-C | rs3798220   | 6  | 160961137 | t | 0.136 | 0.008 | 1.2E-64  | 0.0007 | 410.3  |
| LDL-C | rs10455872  | 6  | 161010118 | a | 0.088 | 0.006 | 4.6E-54  | 0.0010 | 610.7  |
| LDL-C | rs12175867  | 6  | 161019138 | t | 0.025 | 0.003 | 1.8E-14  | 0.0002 | 145.5  |
| LDL-C | rs1652507   | 6  | 161082461 | t | 0.027 | 0.003 | 1.2E-19  | 0.0002 | 125.7  |
| LDL-C | rs10263252  | 7  | 1049949   | a | 0.023 | 0.003 | 6.3E-12  | 0.0002 | 107.4  |
| LDL-C | rs1997243   | 7  | 1083777   | a | 0.016 | 0.003 | 6.7E-09  | 0.0001 | 43.9   |
| LDL-C | rs144787122 | 7  | 2296552   | a | 0.104 | 0.018 | 4.0E-09  | 0.0001 | 44.1   |
| LDL-C | rs2282889   | 7  | 21476188  | a | 0.016 | 0.003 | 5.0E-09  | 0.0001 | 80.4   |
| LDL-C | rs12670798  | 7  | 21607352  | t | 0.029 | 0.002 | 1.4E-34  | 0.0003 | 196.1  |
| LDL-C | rs4722551   | 7  | 25991826  | t | 0.039 | 0.003 | 3.2E-42  | 0.0004 | 256.4  |
| LDL-C | rs2391211   | 7  | 26008233  | t | 0.023 | 0.004 | 7.7E-11  | 0.0002 | 106.7  |
| LDL-C | rs4302748   | 7  | 36191699  | a | 0.015 | 0.003 | 1.2E-09  | 0.0001 | 44.7   |
| LDL-C | rs35803101  | 7  | 44578500  | a | 0.139 | 0.017 | 1.1E-15  | 0.0001 | 82.8   |
| LDL-C | rs10260606  | 7  | 44584551  | c | 0.037 | 0.003 | 1.2E-32  | 0.0004 | 260.1  |
| LDL-C | rs1014283   | 7  | 87076587  | a | 0.019 | 0.003 | 2.0E-09  | 0.0001 | 63.9   |
| LDL-C | rs330093    | 8  | 9175958   | c | 0.029 | 0.003 | 2.0E-20  | 0.0003 | 187.1  |
| LDL-C | rs11774381  | 8  | 9183339   | t | 0.029 | 0.003 | 1.9E-24  | 0.0003 | 203.9  |
| LDL-C | rs11782386  | 8  | 9201787   | t | 0.025 | 0.003 | 8.5E-13  | 0.0001 | 72.3   |
| LDL-C | rs4921914   | 8  | 18272438  | t | 0.018 | 0.002 | 4.9E-14  | 0.0001 | 73.3   |
| LDL-C | rs9298506   | 8  | 55437524  | a | 0.022 | 0.003 | 8.4E-16  | 0.0002 | 92.9   |
| LDL-C | rs2081687   | 8  | 59388565  | t | 0.027 | 0.002 | 2.5E-37  | 0.0003 | 202.4  |
| LDL-C | rs2737245   | 8  | 116658583 | t | 0.018 | 0.003 | 2.7E-09  | 0.0001 | 76.6   |
| LDL-C | rs2954029   | 8  | 126490972 | a | 0.024 | 0.003 | 4.1E-18  | 0.0003 | 178.7  |
| LDL-C | rs4870941   | 8  | 126498828 | c | 0.044 | 0.004 | 3.3E-33  | 0.0007 | 422.8  |
| LDL-C | rs2954038   | 8  | 126507389 | a | 0.037 | 0.003 | 8.5E-32  | 0.0006 | 344.9  |
| LDL-C | rs3780181   | 9  | 2640759   | a | 0.033 | 0.004 | 4.1E-17  | 0.0001 | 89.4   |
| LDL-C | rs67710536  | 9  | 19376255  | a | 0.027 | 0.003 | 3.7E-15  | 0.0001 | 80.5   |
| LDL-C | rs10757272  | 9  | 22088260  | t | 0.020 | 0.003 | 2.9E-10  | 0.0002 | 117.8  |
| LDL-C | rs3905000   | 9  | 107657070 | a | 0.018 | 0.003 | 6.7E-10  | 0.0001 | 51.0   |
| LDL-C | rs635634    | 9  | 136155000 | t | 0.075 | 0.003 | 1.5E-182 | 0.0018 | 1094.2 |
| LDL-C | rs3812594   | 9  | 139368953 | a | 0.014 | 0.002 | 1.6E-09  | 0.0001 | 44.9   |
| LDL-C | rs7080366   | 10 | 17254832  | t | 0.019 | 0.003 | 8.5E-15  | 0.0002 | 115.9  |
| LDL-C | rs41274050  | 10 | 52573772  | t | 0.077 | 0.011 | 4.8E-12  | 0.0002 | 142.2  |
| LDL-C | rs2068888   | 10 | 94839642  | a | 0.017 | 0.002 | 1.1E-17  | 0.0001 | 89.7   |
| LDL-C | rs2274224   | 10 | 96039597  | c | 0.014 | 0.002 | 3.0E-09  | 0.0001 | 61.7   |
| LDL-C | rs2792751   | 10 | 113940329 | t | 0.026 | 0.002 | 1.1E-32  | 0.0003 | 176.5  |
| LDL-C | rs1891110   | 10 | 124610027 | a | 0.021 | 0.002 | 3.0E-26  | 0.0002 | 137.3  |
| LDL-C | rs4752805   | 11 | 48018355  | a | 0.015 | 0.002 | 7.0E-10  | 0.0001 | 50.7   |
| LDL-C | rs174449    | 11 | 61640379  | a | 0.027 | 0.003 | 1.1E-26  | 0.0003 | 204.8  |
| LDL-C | rs2521567   | 11 | 61699055  | a | 0.015 | 0.002 | 5.9E-10  | 0.0001 | 66.6   |

|       |             |    |           |   |       |       |         |        |        |
|-------|-------------|----|-----------|---|-------|-------|---------|--------|--------|
| LDL-C | rs3816492   | 11 | 66297363  | t | 0.017 | 0.002 | 3.4E-12 | 0.0001 | 61.4   |
| LDL-C | rs11603023  | 11 | 118486067 | t | 0.013 | 0.002 | 3.0E-10 | 0.0001 | 47.9   |
| LDL-C | rs7941030   | 11 | 122522375 | t | 0.014 | 0.002 | 5.7E-12 | 0.0001 | 55.0   |
| LDL-C | rs10893500  | 11 | 126250774 | t | 0.043 | 0.003 | 4.0E-36 | 0.0004 | 271.7  |
| LDL-C | rs1521516   | 12 | 51055708  | t | 0.016 | 0.003 | 1.2E-10 | 0.0001 | 73.2   |
| LDL-C | rs61754230  | 12 | 72179446  | t | 0.052 | 0.008 | 2.3E-11 | 0.0001 | 55.4   |
| LDL-C | rs3184504   | 12 | 111884608 | t | 0.026 | 0.002 | 1.4E-34 | 0.0003 | 204.5  |
| LDL-C | rs1169288   | 12 | 121416650 | a | 0.035 | 0.002 | 1.1E-55 | 0.0005 | 326.9  |
| LDL-C | rs10773003  | 12 | 123775127 | a | 0.024 | 0.004 | 3.1E-09 | 0.0001 | 56.7   |
| LDL-C | rs11571836  | 13 | 32973439  | a | 0.021 | 0.003 | 4.1E-10 | 0.0002 | 94.1   |
| LDL-C | rs3742318   | 13 | 33017043  | t | 0.020 | 0.003 | 9.2E-16 | 0.0001 | 78.6   |
| LDL-C | rs4773173   | 13 | 111025118 | a | 0.016 | 0.003 | 5.4E-11 | 0.0001 | 75.4   |
| LDL-C | rs9646133   | 14 | 71096344  | t | 0.019 | 0.002 | 2.0E-20 | 0.0002 | 101.4  |
| LDL-C | rs13379043  | 14 | 74250126  | t | 0.014 | 0.002 | 5.5E-11 | 0.0001 | 52.7   |
| LDL-C | rs28929474  | 14 | 94844947  | t | 0.071 | 0.008 | 5.0E-19 | 0.0002 | 102.5  |
| LDL-C | rs3812945   | 15 | 75289722  | t | 0.015 | 0.002 | 4.1E-10 | 0.0001 | 68.7   |
| LDL-C | rs35259348  | 16 | 72003952  | c | 0.020 | 0.003 | 7.7E-13 | 0.0001 | 90.1   |
| LDL-C | rs7197453   | 16 | 72079127  | c | 0.025 | 0.004 | 1.5E-12 | 0.0003 | 177.3  |
| LDL-C | rs217181    | 16 | 72114002  | t | 0.049 | 0.003 | 1.3E-48 | 0.0008 | 492.6  |
| LDL-C | rs9302635   | 16 | 72144174  | t | 0.055 | 0.004 | 1.9E-41 | 0.0009 | 559.9  |
| LDL-C | rs28555129  | 16 | 83984776  | a | 0.013 | 0.002 | 1.1E-09 | 0.0001 | 48.7   |
| LDL-C | rs8069974   | 17 | 4670972   | c | 0.015 | 0.003 | 3.4E-09 | 0.0001 | 62.2   |
| LDL-C | rs314253    | 17 | 7091650   | t | 0.020 | 0.002 | 4.6E-22 | 0.0002 | 115.1  |
| LDL-C | rs871841    | 17 | 8216468   | t | 0.015 | 0.002 | 2.5E-13 | 0.0001 | 66.1   |
| LDL-C | rs6502640   | 17 | 18122485  | a | 0.019 | 0.003 | 3.6E-09 | 0.0001 | 75.4   |
| LDL-C | rs704       | 17 | 26694861  | a | 0.020 | 0.002 | 2.2E-23 | 0.0002 | 124.4  |
| LDL-C | rs12601110  | 17 | 27035335  | a | 0.027 | 0.005 | 4.9E-09 | 0.0001 | 71.0   |
| LDL-C | rs1487971   | 17 | 28572753  | t | 0.016 | 0.002 | 8.3E-11 | 0.0001 | 71.9   |
| LDL-C | rs11080150  | 17 | 29629326  | a | 0.015 | 0.002 | 2.3E-11 | 0.0001 | 57.7   |
| LDL-C | rs72836561  | 17 | 41926126  | t | 0.037 | 0.006 | 2.5E-10 | 0.0001 | 51.2   |
| LDL-C | rs4968318   | 17 | 45451894  | a | 0.022 | 0.002 | 1.7E-27 | 0.0002 | 142.7  |
| LDL-C | rs118004742 | 17 | 45468858  | t | 0.029 | 0.005 | 2.2E-09 | 0.0001 | 52.4   |
| LDL-C | rs12939848  | 17 | 65370808  | t | 0.014 | 0.002 | 5.6E-09 | 0.0001 | 56.8   |
| LDL-C | rs12602912  | 17 | 65870073  | t | 0.016 | 0.002 | 7.2E-11 | 0.0001 | 46.9   |
| LDL-C | rs77542162  | 17 | 67081278  | a | 0.177 | 0.009 | 1.9E-84 | 0.0011 | 667.1  |
| LDL-C | rs4968839   | 17 | 67125840  | t | 0.039 | 0.003 | 5.8E-47 | 0.0006 | 395.5  |
| LDL-C | rs72852601  | 17 | 67149972  | t | 0.048 | 0.008 | 2.5E-09 | 0.0001 | 48.2   |
| LDL-C | rs2886232   | 17 | 67150176  | t | 0.041 | 0.005 | 6.6E-17 | 0.0003 | 202.3  |
| LDL-C | rs4485425   | 17 | 73767437  | a | 0.019 | 0.002 | 2.2E-16 | 0.0002 | 94.0   |
| LDL-C | rs4129767   | 17 | 76403984  | a | 0.016 | 0.002 | 5.1E-15 | 0.0001 | 75.7   |
| LDL-C | rs77960347  | 18 | 47109955  | a | 0.080 | 0.009 | 1.1E-17 | 0.0002 | 104.4  |
| LDL-C | rs7241918   | 18 | 47160953  | t | 0.019 | 0.003 | 9.0E-12 | 0.0001 | 60.0   |
| LDL-C | rs941408    | 19 | 2814181   | t | 0.016 | 0.003 | 3.7E-10 | 0.0001 | 67.5   |
| LDL-C | rs1982074   | 19 | 10668673  | a | 0.023 | 0.003 | 3.2E-18 | 0.0002 | 97.1   |
| LDL-C | rs892010    | 19 | 11038843  | c | 0.040 | 0.005 | 2.3E-13 | 0.0002 | 120.0  |
| LDL-C | rs10417443  | 19 | 11129429  | c | 0.032 | 0.003 | 1.5E-31 | 0.0005 | 322.9  |
| LDL-C | rs1122608   | 19 | 11163601  | t | 0.048 | 0.003 | 9.6E-63 | 0.0008 | 511.3  |
| LDL-C | rs4300767   | 19 | 11163689  | a | 0.095 | 0.006 | 3.8E-63 | 0.0017 | 1063.1 |
| LDL-C | rs6511721   | 19 | 11206575  | a | 0.037 | 0.003 | 1.1E-31 | 0.0007 | 425.7  |

|       |             |    |          |   |       |       |          |        |        |
|-------|-------------|----|----------|---|-------|-------|----------|--------|--------|
| LDL-C | rs73015030  | 19 | 11207516 | a | 0.079 | 0.009 | 4.8E-20  | 0.0004 | 223.7  |
| LDL-C | rs3745677   | 19 | 11211077 | a | 0.077 | 0.008 | 4.0E-20  | 0.0007 | 432.9  |
| LDL-C | rs11669576  | 19 | 11222300 | a | 0.064 | 0.007 | 3.6E-22  | 0.0004 | 238.5  |
| LDL-C | rs45508991  | 19 | 11233886 | t | 0.106 | 0.015 | 3.5E-13  | 0.0001 | 82.0   |
| LDL-C | rs5927      | 19 | 11233941 | a | 0.030 | 0.004 | 7.9E-15  | 0.0003 | 208.9  |
| LDL-C | rs2569538   | 19 | 11238548 | a | 0.061 | 0.007 | 2.1E-20  | 0.0006 | 389.1  |
| LDL-C | rs892115    | 19 | 11263650 | t | 0.023 | 0.004 | 2.3E-10  | 0.0002 | 143.1  |
| LDL-C | rs6511727   | 19 | 11315817 | t | 0.020 | 0.003 | 1.8E-15  | 0.0002 | 119.4  |
| LDL-C | rs4804579   | 19 | 11358700 | t | 0.024 | 0.004 | 2.8E-10  | 0.0002 | 99.9   |
| LDL-C | rs58542926  | 19 | 19379549 | t | 0.098 | 0.004 | 7.5E-146 | 0.0013 | 816.7  |
| LDL-C | rs150090162 | 19 | 44536189 | a | 0.161 | 0.019 | 1.0E-16  | 0.0002 | 115.4  |
| LDL-C | rs8103315   | 19 | 45254168 | a | 0.028 | 0.004 | 2.0E-11  | 0.0002 | 102.2  |
| LDL-C | rs35106910  | 19 | 45284266 | a | 0.032 | 0.005 | 1.3E-11  | 0.0001 | 58.6   |
| LDL-C | rs1135062   | 19 | 45322744 | a | 0.017 | 0.002 | 4.5E-13  | 0.0001 | 73.4   |
| LDL-C | rs3852856   | 19 | 45361574 | a | 0.061 | 0.005 | 5.9E-38  | 0.0012 | 747.4  |
| LDL-C | rs12610605  | 19 | 45370838 | a | 0.126 | 0.005 | 4.9E-164 | 0.0043 | 2678.6 |
| LDL-C | rs8104483   | 19 | 45372354 | t | 0.087 | 0.004 | 3.4E-116 | 0.0031 | 1927.4 |
| LDL-C | rs6859      | 19 | 45382034 | a | 0.078 | 0.003 | 8.7E-132 | 0.0030 | 1842.4 |
| LDL-C | rs11669338  | 19 | 45382984 | t | 0.050 | 0.006 | 8.0E-16  | 0.0004 | 255.7  |
| LDL-C | rs3852861   | 19 | 45383061 | t | 0.056 | 0.004 | 1.1E-45  | 0.0015 | 950.4  |
| LDL-C | rs187706273 | 19 | 45385488 | a | 0.108 | 0.016 | 4.4E-11  | 0.0001 | 76.1   |
| LDL-C | rs157580    | 19 | 45395266 | a | 0.075 | 0.003 | 2.2E-113 | 0.0027 | 1659.5 |
| LDL-C | rs157582    | 19 | 45396219 | t | 0.032 | 0.005 | 7.3E-11  | 0.0004 | 226.2  |
| LDL-C | rs115881343 | 19 | 45403216 | t | 0.195 | 0.009 | 6.8E-94  | 0.0018 | 1136.5 |
| LDL-C | rs10119     | 19 | 45406673 | a | 0.067 | 0.004 | 1.9E-53  | 0.0018 | 1103.7 |
| LDL-C | rs405509    | 19 | 45408836 | t | 0.173 | 0.004 | 0.0E+00  | 0.0149 | 9325.2 |
| LDL-C | rs769450    | 19 | 45410444 | a | 0.060 | 0.005 | 2.9E-37  | 0.0018 | 1093.3 |
| LDL-C | rs769452    | 19 | 45411110 | t | 0.149 | 0.020 | 4.3E-14  | 0.0001 | 71.4   |
| LDL-C | rs439401    | 19 | 45414451 | t | 0.029 | 0.003 | 4.6E-22  | 0.0004 | 249.3  |
| LDL-C | rs59325138  | 19 | 45416291 | t | 0.098 | 0.004 | 1.0E-119 | 0.0046 | 2845.8 |
| LDL-C | rs732841    | 19 | 46207810 | a | 0.041 | 0.006 | 6.0E-13  | 0.0002 | 103.2  |
| LDL-C | rs17651629  | 19 | 46406463 | t | 0.032 | 0.004 | 1.3E-17  | 0.0002 | 127.7  |
| LDL-C | rs492602    | 19 | 49206417 | a | 0.028 | 0.002 | 4.3E-40  | 0.0004 | 238.7  |
| LDL-C | rs641738    | 19 | 54676763 | t | 0.014 | 0.002 | 1.0E-09  | 0.0001 | 59.7   |
| LDL-C | rs35350976  | 19 | 59023174 | a | 0.017 | 0.003 | 7.2E-09  | 0.0001 | 51.8   |
| LDL-C | rs2143544   | 20 | 17789221 | t | 0.016 | 0.003 | 5.5E-09  | 0.0001 | 80.9   |
| LDL-C | rs2745865   | 20 | 17847735 | t | 0.039 | 0.004 | 2.1E-26  | 0.0004 | 239.8  |
| LDL-C | rs6058302   | 20 | 34290037 | t | 0.027 | 0.003 | 1.8E-15  | 0.0002 | 106.0  |
| LDL-C | rs6016373   | 20 | 39154095 | a | 0.023 | 0.002 | 9.2E-30  | 0.0002 | 150.9  |
| LDL-C | rs926663    | 20 | 39245775 | a | 0.014 | 0.003 | 8.3E-09  | 0.0001 | 62.1   |
| LDL-C | rs6072328   | 20 | 39913996 | t | 0.026 | 0.003 | 1.7E-22  | 0.0003 | 203.1  |
| LDL-C | rs6062343   | 20 | 62695931 | a | 0.015 | 0.002 | 2.9E-13  | 0.0001 | 65.6   |
| LDL-C | rs2833487   | 21 | 33087863 | a | 0.035 | 0.006 | 4.3E-10  | 0.0001 | 71.1   |
| LDL-C | rs2183573   | 21 | 40574305 | a | 0.014 | 0.002 | 4.0E-10  | 0.0001 | 61.7   |
| LDL-C | rs138777    | 22 | 35711098 | a | 0.013 | 0.002 | 2.3E-09  | 0.0001 | 45.0   |
| LDL-C | rs738409    | 22 | 44324727 | c | 0.015 | 0.002 | 6.8E-10  | 0.0001 | 47.2   |
| LDL-C | rs13268     | 22 | 45996298 | a | 0.042 | 0.007 | 3.6E-10  | 0.0001 | 48.6   |
| TG    | rs1077514   | 1  | 23766233 | t | 0.021 | 0.003 | 2.4E-14  | 0.0001 | 71.0   |
| TG    | rs16826069  | 1  | 39797055 | a | 0.024 | 0.002 | 5.4E-23  | 0.0002 | 116.7  |

|    |             |   |           |   |       |       |          |        |        |
|----|-------------|---|-----------|---|-------|-------|----------|--------|--------|
| TG | rs2055491   | 1 | 50852769  | t | 0.012 | 0.002 | 3.6E-09  | 0.0001 | 43.0   |
| TG | rs10889353  | 1 | 63118196  | a | 0.075 | 0.002 | 2.0E-280 | 0.0025 | 1552.9 |
| TG | rs2613503   | 1 | 72839774  | a | 0.020 | 0.003 | 1.5E-11  | 0.0001 | 74.0   |
| TG | rs12740374  | 1 | 109817590 | t | 0.015 | 0.002 | 1.8E-10  | 0.0001 | 48.9   |
| TG | rs12043350  | 1 | 153854380 | t | 0.015 | 0.003 | 9.4E-10  | 0.0001 | 61.4   |
| TG | rs1011731   | 1 | 172346548 | a | 0.013 | 0.002 | 4.1E-11  | 0.0001 | 52.6   |
| TG | rs78444298  | 1 | 184672098 | a | 0.052 | 0.009 | 3.0E-09  | 0.0001 | 51.3   |
| TG | rs2821231   | 1 | 203518382 | t | 0.016 | 0.003 | 3.9E-09  | 0.0001 | 77.8   |
| TG | rs765751    | 1 | 219669226 | t | 0.020 | 0.002 | 2.3E-17  | 0.0002 | 109.9  |
| TG | rs10489615  | 1 | 230304988 | a | 0.039 | 0.002 | 3.2E-85  | 0.0007 | 461.5  |
| TG | rs2273967   | 1 | 230415293 | t | 0.018 | 0.003 | 8.8E-11  | 0.0001 | 69.0   |
| TG | rs1473886   | 2 | 20368519  | t | 0.017 | 0.002 | 1.2E-13  | 0.0001 | 89.8   |
| TG | rs1801701   | 2 | 21228827  | t | 0.030 | 0.004 | 2.2E-17  | 0.0001 | 89.0   |
| TG | rs676210    | 2 | 21231524  | a | 0.076 | 0.002 | 3.7E-211 | 0.0020 | 1208.9 |
| TG | rs541041    | 2 | 21294975  | a | 0.023 | 0.003 | 1.2E-18  | 0.0002 | 102.0  |
| TG | rs3208747   | 2 | 24431127  | t | 0.150 | 0.022 | 6.3E-12  | 0.0001 | 66.5   |
| TG | rs1049817   | 2 | 27550967  | a | 0.046 | 0.003 | 5.2E-49  | 0.0010 | 623.5  |
| TG | rs11689803  | 2 | 27566520  | a | 0.021 | 0.004 | 1.0E-09  | 0.0002 | 111.0  |
| TG | rs11891554  | 2 | 27613617  | a | 0.096 | 0.006 | 7.2E-63  | 0.0008 | 472.4  |
| TG | rs79593977  | 2 | 27702663  | a | 0.269 | 0.029 | 2.0E-20  | 0.0013 | 806.8  |
| TG | rs780090    | 2 | 27718474  | t | 0.048 | 0.005 | 1.9E-23  | 0.0004 | 237.5  |
| TG | rs147073127 | 2 | 27726437  | a | 0.213 | 0.019 | 2.7E-28  | 0.0003 | 162.7  |
| TG | rs814295    | 2 | 27743215  | a | 0.077 | 0.004 | 9.3E-90  | 0.0016 | 982.0  |
| TG | rs1919128   | 2 | 27801759  | a | 0.046 | 0.003 | 1.4E-47  | 0.0008 | 499.0  |
| TG | rs115289288 | 2 | 28006500  | t | 0.222 | 0.019 | 1.4E-31  | 0.0022 | 1336.3 |
| TG | rs4245791   | 2 | 44074431  | t | 0.017 | 0.002 | 1.1E-14  | 0.0001 | 75.1   |
| TG | rs1861410   | 2 | 58933591  | t | 0.016 | 0.003 | 2.0E-09  | 0.0001 | 74.3   |
| TG | rs2723062   | 2 | 65280220  | a | 0.023 | 0.003 | 1.6E-17  | 0.0002 | 151.0  |
| TG | rs2049019   | 2 | 66671858  | a | 0.014 | 0.002 | 9.5E-09  | 0.0001 | 50.4   |
| TG | rs13396091  | 2 | 146371961 | a | 0.014 | 0.002 | 2.0E-09  | 0.0001 | 57.8   |
| TG | rs13389219  | 2 | 165528876 | t | 0.035 | 0.002 | 2.1E-62  | 0.0006 | 364.9  |
| TG | rs16849863  | 2 | 165728290 | t | 0.056 | 0.008 | 1.6E-12  | 0.0001 | 71.7   |
| TG | rs3769823   | 2 | 202122995 | a | 0.014 | 0.002 | 3.2E-10  | 0.0001 | 50.0   |
| TG | rs6435161   | 2 | 203519783 | t | 0.015 | 0.002 | 1.4E-09  | 0.0001 | 55.5   |
| TG | rs1344642   | 2 | 219555262 | a | 0.013 | 0.002 | 5.1E-11  | 0.0001 | 52.5   |
| TG | rs2943650   | 2 | 227105921 | t | 0.042 | 0.003 | 2.9E-48  | 0.0008 | 523.1  |
| TG | rs1801282   | 3 | 12393125  | c | 0.034 | 0.003 | 3.7E-26  | 0.0002 | 149.4  |
| TG | rs17819328  | 3 | 12489342  | t | 0.025 | 0.002 | 3.3E-26  | 0.0003 | 191.2  |
| TG | rs13326165  | 3 | 52532118  | a | 0.017 | 0.003 | 1.4E-11  | 0.0001 | 56.1   |
| TG | rs7621025   | 3 | 136272246 | t | 0.021 | 0.003 | 4.1E-10  | 0.0002 | 96.8   |
| TG | rs4683438   | 3 | 142652559 | t | 0.017 | 0.002 | 8.1E-13  | 0.0001 | 82.8   |
| TG | rs382534    | 3 | 155547274 | t | 0.015 | 0.003 | 4.5E-09  | 0.0001 | 54.4   |
| TG | rs9822326   | 3 | 156803565 | a | 0.016 | 0.002 | 3.8E-11  | 0.0001 | 73.7   |
| TG | rs10513687  | 3 | 170725730 | t | 0.022 | 0.003 | 6.7E-11  | 0.0001 | 67.4   |
| TG | rs17600346  | 3 | 172223982 | t | 0.046 | 0.007 | 3.3E-11  | 0.0002 | 101.7  |
| TG | rs6599389   | 4 | 939113    | a | 0.022 | 0.004 | 6.9E-09  | 0.0001 | 45.5   |
| TG | rs11248060  | 4 | 964359    | t | 0.022 | 0.003 | 6.1E-13  | 0.0001 | 64.6   |
| TG | rs3748034   | 4 | 3446091   | t | 0.028 | 0.003 | 2.9E-19  | 0.0002 | 119.8  |

|    |            |   |           |   |       |       |         |        |       |
|----|------------|---|-----------|---|-------|-------|---------|--------|-------|
| TG | rs16844401 | 4 | 3449652   | a | 0.032 | 0.004 | 1.0E-14 | 0.0001 | 80.5  |
| TG | rs6831256  | 4 | 3473139   | a | 0.014 | 0.002 | 1.7E-11 | 0.0001 | 60.4  |
| TG | rs9884830  | 4 | 26027797  | t | 0.019 | 0.003 | 2.4E-10 | 0.0001 | 62.0  |
| TG | rs1037814  | 4 | 88049850  | t | 0.024 | 0.002 | 2.8E-24 | 0.0003 | 177.9 |
| TG | rs10029254 | 4 | 88160140  | t | 0.021 | 0.003 | 1.1E-13 | 0.0002 | 93.7  |
| TG | rs13133548 | 4 | 89740128  | a | 0.012 | 0.002 | 3.3E-09 | 0.0001 | 43.2  |
| TG | rs1126673  | 4 | 100045616 | t | 0.018 | 0.002 | 5.6E-16 | 0.0001 | 81.2  |
| TG | rs13107325 | 4 | 103188709 | t | 0.033 | 0.004 | 1.7E-15 | 0.0002 | 95.3  |
| TG | rs41278045 | 4 | 110638764 | a | 0.199 | 0.029 | 4.0E-12 | 0.0001 | 58.7  |
| TG | rs6054     | 4 | 155489608 | t | 0.123 | 0.018 | 7.2E-12 | 0.0001 | 67.4  |
| TG | rs6855363  | 4 | 157670537 | t | 0.017 | 0.002 | 5.9E-12 | 0.0001 | 74.3  |
| TG | rs4311394  | 5 | 53300662  | a | 0.020 | 0.002 | 3.4E-20 | 0.0002 | 98.2  |
| TG | rs459193   | 5 | 55806751  | a | 0.035 | 0.002 | 3.7E-52 | 0.0005 | 300.7 |
| TG | rs2448428  | 5 | 55844049  | t | 0.015 | 0.002 | 4.3E-10 | 0.0001 | 68.3  |
| TG | rs9686661  | 5 | 55861786  | t | 0.044 | 0.003 | 2.3E-67 | 0.0006 | 374.1 |
| TG | rs4976033  | 5 | 67714246  | a | 0.016 | 0.002 | 1.2E-15 | 0.0001 | 78.1  |
| TG | rs1045241  | 5 | 118729286 | t | 0.017 | 0.003 | 3.7E-11 | 0.0001 | 71.3  |
| TG | rs26008    | 5 | 131008194 | t | 0.024 | 0.004 | 2.3E-10 | 0.0001 | 49.1  |
| TG | rs4705986  | 5 | 132349654 | t | 0.034 | 0.006 | 4.4E-09 | 0.0001 | 84.1  |
| TG | rs4704820  | 5 | 156334681 | t | 0.022 | 0.003 | 1.0E-11 | 0.0001 | 88.6  |
| TG | rs6882076  | 5 | 156390297 | t | 0.042 | 0.002 | 6.7E-83 | 0.0008 | 501.2 |
| TG | rs1650527  | 5 | 158022724 | t | 0.025 | 0.003 | 5.1E-16 | 0.0002 | 138.9 |
| TG | rs2524060  | 6 | 31267422  | a | 0.029 | 0.003 | 3.3E-20 | 0.0003 | 185.6 |
| TG | rs2442719  | 6 | 31320538  | t | 0.024 | 0.002 | 7.5E-32 | 0.0003 | 178.9 |
| TG | rs17207867 | 6 | 31938412  | t | 0.027 | 0.004 | 5.0E-13 | 0.0001 | 70.2  |
| TG | rs9271366  | 6 | 32586854  | a | 0.028 | 0.003 | 7.4E-19 | 0.0002 | 119.2 |
| TG | rs9273368  | 6 | 32626475  | a | 0.018 | 0.003 | 9.3E-09 | 0.0001 | 78.8  |
| TG | rs11752643 | 6 | 32669373  | t | 0.066 | 0.006 | 3.7E-26 | 0.0003 | 155.8 |
| TG | rs2395655  | 6 | 36645696  | a | 0.017 | 0.002 | 6.6E-13 | 0.0001 | 80.0  |
| TG | rs6458349  | 6 | 43759789  | a | 0.038 | 0.003 | 4.1E-37 | 0.0006 | 353.7 |
| TG | rs78807370 | 6 | 43761091  | a | 0.043 | 0.004 | 3.9E-31 | 0.0005 | 293.1 |
| TG | rs881858   | 6 | 43806609  | a | 0.020 | 0.002 | 1.8E-20 | 0.0002 | 107.2 |
| TG | rs4715316  | 6 | 52628998  | t | 0.016 | 0.003 | 8.5E-09 | 0.0001 | 68.8  |
| TG | rs2745353  | 6 | 127452935 | t | 0.019 | 0.002 | 1.9E-20 | 0.0002 | 106.0 |
| TG | rs9388768  | 6 | 130374102 | a | 0.013 | 0.002 | 1.2E-09 | 0.0001 | 45.4  |
| TG | rs643381   | 6 | 139839423 | a | 0.024 | 0.002 | 3.2E-32 | 0.0003 | 172.5 |
| TG | rs12208357 | 6 | 160543148 | t | 0.030 | 0.004 | 1.1E-13 | 0.0001 | 75.1  |
| TG | rs2665357  | 6 | 160848167 | a | 0.018 | 0.002 | 1.9E-15 | 0.0002 | 104.3 |
| TG | rs645718   | 6 | 161406239 | a | 0.034 | 0.005 | 2.1E-10 | 0.0001 | 62.5  |
| TG | rs12699758 | 7 | 15964238  | a | 0.016 | 0.003 | 3.6E-09 | 0.0001 | 58.1  |
| TG | rs4410790  | 7 | 17284577  | t | 0.012 | 0.002 | 1.4E-09 | 0.0001 | 43.2  |
| TG | rs10235225 | 7 | 25905599  | a | 0.015 | 0.002 | 1.3E-09 | 0.0001 | 64.9  |
| TG | rs4722551  | 7 | 25991826  | t | 0.019 | 0.003 | 1.1E-11 | 0.0001 | 63.7  |
| TG | rs1534696  | 7 | 26397239  | a | 0.019 | 0.002 | 2.9E-15 | 0.0002 | 110.6 |
| TG | rs2070971  | 7 | 44197583  | t | 0.023 | 0.003 | 7.2E-12 | 0.0001 | 84.4  |
| TG | rs3757838  | 7 | 44231310  | a | 0.030 | 0.005 | 3.8E-11 | 0.0001 | 71.5  |
| TG | rs1178979  | 7 | 72856430  | t | 0.044 | 0.004 | 1.1E-30 | 0.0006 | 353.9 |
| TG | rs799158   | 7 | 73019074  | t | 0.076 | 0.008 | 4.0E-21 | 0.0004 | 273.6 |
| TG | rs3812316  | 7 | 73020337  | c | 0.087 | 0.005 | 4.3E-82 | 0.0016 | 987.5 |
| TG | rs287621   | 7 | 130435181 | t | 0.022 | 0.003 | 4.7E-19 | 0.0002 | 123.0 |



|    |            |    |           |   |       |       |          |        |        |
|----|------------|----|-----------|---|-------|-------|----------|--------|--------|
| TG | rs3735080  | 7  | 150217309 | t | 0.016 | 0.002 | 2.6E-11  | 0.0001 | 56.2   |
| TG | rs16884656 | 7  | 150512307 | t | 0.024 | 0.004 | 8.3E-09  | 0.0001 | 75.6   |
| TG | rs4240624  | 8  | 9184231   | a | 0.034 | 0.004 | 1.2E-17  | 0.0002 | 108.7  |
| TG | rs11776767 | 8  | 10683929  | c | 0.024 | 0.002 | 1.3E-27  | 0.0003 | 160.1  |
| TG | rs2686187  | 8  | 11654796  | a | 0.014 | 0.002 | 3.7E-09  | 0.0001 | 60.5   |
| TG | rs3947     | 8  | 11702375  | a | 0.019 | 0.002 | 7.1E-15  | 0.0001 | 86.5   |
| TG | rs1495741  | 8  | 18272881  | a | 0.036 | 0.002 | 3.4E-56  | 0.0005 | 296.3  |
| TG | rs1801177  | 8  | 19805708  | a | 0.095 | 0.009 | 1.1E-26  | 0.0003 | 202.0  |
| TG | rs264      | 8  | 19813180  | a | 0.028 | 0.003 | 7.9E-17  | 0.0002 | 120.1  |
| TG | rs268      | 8  | 19813529  | a | 0.232 | 0.008 | 5.5E-202 | 0.0017 | 1058.9 |
| TG | rs301      | 8  | 19816934  | t | 0.062 | 0.005 | 2.8E-36  | 0.0015 | 904.3  |
| TG | rs312      | 8  | 19817997  | c | 0.048 | 0.006 | 1.4E-13  | 0.0005 | 302.0  |
| TG | rs326      | 8  | 19819439  | a | 0.078 | 0.005 | 6.7E-63  | 0.0026 | 1582.2 |
| TG | rs12545984 | 8  | 19847259  | t | 0.044 | 0.006 | 2.1E-13  | 0.0005 | 316.6  |
| TG | rs17091905 | 8  | 19849757  | a | 0.042 | 0.006 | 1.5E-13  | 0.0004 | 237.7  |
| TG | rs10105418 | 8  | 19875365  | a | 0.082 | 0.009 | 1.9E-21  | 0.0003 | 208.6  |
| TG | rs4637851  | 8  | 19922610  | a | 0.029 | 0.003 | 8.5E-22  | 0.0004 | 236.0  |
| TG | rs13256965 | 8  | 19962962  | a | 0.017 | 0.002 | 7.5E-12  | 0.0001 | 84.7   |
| TG | rs3736147  | 8  | 22471824  | a | 0.018 | 0.003 | 1.7E-10  | 0.0001 | 86.9   |
| TG | rs1982768  | 8  | 25898565  | a | 0.022 | 0.004 | 3.0E-09  | 0.0001 | 74.8   |
| TG | rs2081687  | 8  | 59388565  | t | 0.019 | 0.002 | 9.5E-20  | 0.0002 | 102.6  |
| TG | rs4738141  | 8  | 72469742  | a | 0.017 | 0.003 | 1.6E-09  | 0.0001 | 67.1   |
| TG | rs17730649 | 8  | 126465305 | a | 0.021 | 0.003 | 3.8E-16  | 0.0002 | 137.4  |
| TG | rs6982502  | 8  | 126479362 | t | 0.028 | 0.005 | 5.1E-09  | 0.0004 | 238.0  |
| TG | rs2980876  | 8  | 126481694 | t | 0.091 | 0.005 | 1.4E-73  | 0.0036 | 2230.5 |
| TG | rs8180991  | 8  | 126500350 | c | 0.034 | 0.003 | 2.6E-24  | 0.0004 | 260.5  |
| TG | rs4871624  | 8  | 126629328 | t | 0.020 | 0.003 | 1.0E-14  | 0.0002 | 100.1  |
| TG | rs3927680  | 9  | 16887366  | a | 0.016 | 0.002 | 1.2E-15  | 0.0001 | 78.1   |
| TG | rs4120895  | 9  | 33787532  | t | 0.018 | 0.003 | 4.3E-11  | 0.0001 | 92.3   |
| TG | rs1800978  | 9  | 107665978 | c | 0.027 | 0.004 | 2.9E-13  | 0.0002 | 101.9  |
| TG | rs17134592 | 10 | 5260682   | c | 0.021 | 0.003 | 4.3E-10  | 0.0001 | 64.6   |
| TG | rs41274050 | 10 | 52573772  | t | 0.094 | 0.011 | 2.7E-17  | 0.0003 | 209.2  |
| TG | rs7923609  | 10 | 65133822  | a | 0.030 | 0.003 | 1.2E-21  | 0.0004 | 270.8  |
| TG | rs2298117  | 10 | 70346740  | t | 0.012 | 0.002 | 1.0E-09  | 0.0001 | 45.7   |
| TG | rs7901016  | 10 | 74637326  | t | 0.040 | 0.004 | 3.5E-20  | 0.0002 | 114.7  |
| TG | rs10748579 | 10 | 94090498  | a | 0.018 | 0.002 | 1.9E-18  | 0.0002 | 95.4   |
| TG | rs7081888  | 10 | 94764660  | t | 0.033 | 0.005 | 1.7E-11  | 0.0002 | 97.4   |
| TG | rs2068888  | 10 | 94839642  | a | 0.037 | 0.002 | 5.8E-71  | 0.0007 | 415.5  |
| TG | rs2792751  | 10 | 113940329 | t | 0.018 | 0.002 | 7.5E-16  | 0.0001 | 81.0   |
| TG | rs11195943 | 10 | 114154815 | t | 0.023 | 0.004 | 2.0E-10  | 0.0001 | 60.3   |
| TG | rs10886863 | 10 | 122929493 | t | 0.058 | 0.010 | 4.3E-09  | 0.0002 | 110.1  |
| TG | rs7940646  | 11 | 10669228  | t | 0.015 | 0.002 | 4.4E-12  | 0.0001 | 59.5   |
| TG | rs10832027 | 11 | 13357183  | a | 0.016 | 0.002 | 1.8E-11  | 0.0001 | 68.7   |
| TG | rs546383   | 11 | 18065663  | t | 0.013 | 0.002 | 7.6E-09  | 0.0001 | 52.6   |
| TG | rs925946   | 11 | 27667202  | t | 0.016 | 0.002 | 7.6E-14  | 0.0001 | 68.9   |
| TG | rs326214   | 11 | 47298360  | a | 0.022 | 0.002 | 4.1E-26  | 0.0002 | 130.6  |
| TG | rs2727271  | 11 | 61603358  | a | 0.065 | 0.003 | 1.8E-78  | 0.0009 | 586.7  |
| TG | rs174587   | 11 | 61612830  | t | 0.048 | 0.003 | 6.9E-50  | 0.0008 | 467.7  |

|    |             |    |           |   |       |       |         |        |        |
|----|-------------|----|-----------|---|-------|-------|---------|--------|--------|
| TG | rs35169799  | 11 | 64031241  | t | 0.041 | 0.004 | 4.8E-24 | 0.0002 | 120.4  |
| TG | rs4014195   | 11 | 65506822  | c | 0.015 | 0.002 | 2.6E-12 | 0.0001 | 60.8   |
| TG | rs2229738   | 11 | 68562328  | t | 0.024 | 0.004 | 1.6E-10 | 0.0001 | 50.8   |
| TG | rs11237471  | 11 | 78082604  | t | 0.022 | 0.003 | 1.7E-10 | 0.0001 | 83.7   |
| TG | rs4938289   | 11 | 116458785 | t | 0.047 | 0.006 | 1.3E-14 | 0.0003 | 164.7  |
| TG | rs12799766  | 11 | 116558427 | a | 0.042 | 0.005 | 3.7E-19 | 0.0006 | 377.5  |
| TG | rs74360954  | 11 | 116582542 | t | 0.113 | 0.008 | 1.5E-43 | 0.0013 | 804.6  |
| TG | rs2000571   | 11 | 116585533 | a | 0.063 | 0.006 | 1.5E-26 | 0.0013 | 811.0  |
| TG | rs180357    | 11 | 116599504 | t | 0.049 | 0.005 | 4.2E-24 | 0.0010 | 626.6  |
| TG | rs4938307   | 11 | 116604514 | a | 0.073 | 0.007 | 4.7E-28 | 0.0011 | 683.7  |
| TG | rs61730763  | 11 | 116631482 | a | 0.190 | 0.023 | 2.9E-16 | 0.0002 | 128.9  |
| TG | rs17120029  | 11 | 116650118 | t | 0.142 | 0.009 | 1.2E-56 | 0.0025 | 1576.5 |
| TG | rs11604424  | 11 | 116651115 | t | 0.066 | 0.006 | 1.5E-27 | 0.0015 | 930.8  |
| TG | rs619054    | 11 | 116660813 | a | 0.057 | 0.004 | 1.1E-36 | 0.0012 | 716.3  |
| TG | rs143292359 | 11 | 116661001 | a | 0.241 | 0.040 | 1.5E-09 | 0.0001 | 57.6   |
| TG | rs662799    | 11 | 116663707 | a | 0.106 | 0.008 | 1.2E-43 | 0.0015 | 914.6  |
| TG | rs9804646   | 11 | 116665079 | t | 0.060 | 0.006 | 2.8E-23 | 0.0006 | 355.6  |
| TG | rs5104      | 11 | 116692334 | t | 0.035 | 0.004 | 1.6E-17 | 0.0003 | 190.7  |
| TG | rs11216157  | 11 | 116711180 | a | 0.055 | 0.007 | 1.2E-16 | 0.0007 | 434.1  |
| TG | rs888246    | 11 | 116724232 | t | 0.071 | 0.006 | 9.5E-29 | 0.0009 | 550.3  |
| TG | rs2075292   | 11 | 116732512 | t | 0.063 | 0.005 | 8.4E-40 | 0.0009 | 545.8  |
| TG | rs11216168  | 11 | 116741553 | a | 0.069 | 0.006 | 5.3E-27 | 0.0012 | 726.5  |
| TG | rs2000615   | 11 | 116915819 | t | 0.057 | 0.006 | 4.0E-21 | 0.0007 | 430.3  |
| TG | rs490262    | 11 | 117222592 | a | 0.019 | 0.003 | 2.2E-13 | 0.0001 | 67.1   |
| TG | rs7134375   | 12 | 20473758  | a | 0.014 | 0.002 | 7.4E-13 | 0.0001 | 61.9   |
| TG | rs4149056   | 12 | 21331549  | t | 0.032 | 0.003 | 3.3E-30 | 0.0003 | 159.4  |
| TG | rs718314    | 12 | 26453283  | a | 0.019 | 0.003 | 1.4E-14 | 0.0001 | 87.3   |
| TG | rs7979398   | 12 | 46086708  | t | 0.015 | 0.002 | 9.3E-11 | 0.0001 | 68.1   |
| TG | rs11613352  | 12 | 57792580  | t | 0.025 | 0.003 | 5.8E-20 | 0.0002 | 131.4  |
| TG | rs2075260   | 12 | 109696838 | a | 0.015 | 0.003 | 4.6E-09 | 0.0001 | 41.5   |
| TG | rs3742004   | 12 | 111798553 | a | 0.016 | 0.003 | 9.8E-09 | 0.0001 | 53.4   |
| TG | rs940904    | 12 | 123491572 | a | 0.015 | 0.003 | 4.2E-09 | 0.0001 | 55.3   |
| TG | rs11057408  | 12 | 124464836 | t | 0.022 | 0.002 | 2.7E-20 | 0.0002 | 138.5  |
| TG | rs10846744  | 12 | 125312425 | c | 0.027 | 0.003 | 1.3E-15 | 0.0002 | 121.2  |
| TG | rs2298058   | 13 | 95248566  | t | 0.024 | 0.003 | 5.4E-17 | 0.0003 | 157.7  |
| TG | rs7400722   | 13 | 114527838 | a | 0.016 | 0.002 | 1.9E-12 | 0.0001 | 71.6   |
| TG | rs7157785   | 14 | 64235556  | t | 0.020 | 0.003 | 7.1E-13 | 0.0001 | 71.3   |
| TG | rs11634257  | 15 | 40388492  | a | 0.018 | 0.003 | 1.5E-09 | 0.0001 | 74.5   |
| TG | rs17747633  | 15 | 40916237  | a | 0.015 | 0.002 | 4.6E-12 | 0.0001 | 63.2   |
| TG | rs16949992  | 15 | 44238869  | c | 0.075 | 0.006 | 5.7E-34 | 0.0005 | 293.5  |
| TG | rs11858955  | 15 | 44246293  | a | 0.115 | 0.016 | 3.8E-13 | 0.0002 | 133.3  |
| TG | rs493258    | 15 | 58687880  | t | 0.017 | 0.002 | 1.4E-17 | 0.0001 | 89.9   |
| TG | rs12913346  | 15 | 63530965  | a | 0.024 | 0.004 | 4.1E-11 | 0.0001 | 83.5   |
| TG | rs17184382  | 15 | 63792486  | a | 0.017 | 0.002 | 3.9E-13 | 0.0001 | 88.9   |
| TG | rs2415168   | 15 | 73109629  | a | 0.015 | 0.003 | 3.2E-09 | 0.0001 | 55.8   |
| TG | rs10152471  | 15 | 101890913 | a | 0.016 | 0.003 | 4.9E-09 | 0.0001 | 74.6   |
| TG | rs143076454 | 16 | 921179    | a | 0.048 | 0.008 | 6.8E-09 | 0.0001 | 48.6   |
| TG | rs11075253  | 16 | 15148646  | a | 0.027 | 0.003 | 2.6E-15 | 0.0003 | 185.3  |
| TG | rs2032915   | 16 | 31117413  | t | 0.017 | 0.002 | 5.4E-14 | 0.0001 | 87.0   |

|    |             |    |          |   |       |       |          |        |        |
|----|-------------|----|----------|---|-------|-------|----------|--------|--------|
| TG | rs9939609   | 16 | 53820527 | a | 0.019 | 0.002 | 2.0E-21  | 0.0002 | 106.8  |
| TG | rs1800775   | 16 | 56995236 | a | 0.023 | 0.002 | 3.4E-27  | 0.0003 | 162.2  |
| TG | rs7203984   | 16 | 56999258 | a | 0.022 | 0.003 | 5.2E-12  | 0.0002 | 97.0   |
| TG | rs9940315   | 16 | 69876164 | a | 0.019 | 0.003 | 4.7E-13  | 0.0002 | 107.5  |
| TG | rs2000999   | 16 | 72108093 | a | 0.020 | 0.003 | 7.3E-15  | 0.0001 | 81.3   |
| TG | rs12443634  | 16 | 81524274 | a | 0.018 | 0.003 | 9.3E-10  | 0.0001 | 84.4   |
| TG | rs1053328   | 16 | 85711860 | t | 0.014 | 0.002 | 8.8E-09  | 0.0001 | 54.3   |
| TG | rs3853818   | 17 | 7346302  | t | 0.016 | 0.002 | 6.5E-12  | 0.0001 | 75.9   |
| TG | rs897453    | 17 | 17425631 | t | 0.014 | 0.002 | 1.1E-12  | 0.0001 | 61.2   |
| TG | rs1563631   | 17 | 18221134 | t | 0.017 | 0.002 | 6.7E-15  | 0.0001 | 75.2   |
| TG | rs3110454   | 17 | 28651363 | t | 0.017 | 0.003 | 7.4E-10  | 0.0001 | 83.3   |
| TG | rs2306590   | 17 | 34854280 | a | 0.013 | 0.002 | 5.0E-10  | 0.0001 | 50.3   |
| TG | rs2079005   | 17 | 41865627 | t | 0.022 | 0.003 | 6.2E-15  | 0.0002 | 104.3  |
| TG | rs1662750   | 17 | 42011823 | a | 0.018 | 0.003 | 1.4E-11  | 0.0002 | 95.0   |
| TG | rs2074108   | 17 | 42336149 | t | 0.015 | 0.002 | 1.1E-09  | 0.0001 | 64.6   |
| TG | rs11871606  | 17 | 45732774 | a | 0.016 | 0.002 | 3.4E-16  | 0.0001 | 82.2   |
| TG | rs8075803   | 17 | 47346529 | t | 0.019 | 0.002 | 1.3E-16  | 0.0002 | 111.7  |
| TG | rs12602912  | 17 | 65870073 | t | 0.023 | 0.002 | 1.2E-21  | 0.0002 | 100.9  |
| TG | rs2125345   | 17 | 73782191 | t | 0.013 | 0.002 | 1.8E-09  | 0.0001 | 46.5   |
| TG | rs2292642   | 17 | 76395430 | t | 0.021 | 0.002 | 4.3E-25  | 0.0002 | 125.4  |
| TG | rs1652343   | 18 | 21131929 | t | 0.016 | 0.003 | 2.0E-09  | 0.0001 | 75.1   |
| TG | rs17178414  | 19 | 4945250  | t | 0.019 | 0.003 | 1.0E-10  | 0.0002 | 97.1   |
| TG | rs1799816   | 19 | 7125518  | t | 0.068 | 0.011 | 6.4E-10  | 0.0001 | 47.6   |
| TG | rs7248104   | 19 | 7224431  | a | 0.019 | 0.002 | 1.5E-21  | 0.0002 | 108.6  |
| TG | rs116843064 | 19 | 8429323  | a | 0.265 | 0.007 | 3.8E-295 | 0.0036 | 2223.6 |
| TG | rs140744493 | 19 | 8436373  | t | 0.121 | 0.019 | 1.5E-10  | 0.0001 | 50.5   |
| TG | rs1862644   | 19 | 18724315 | a | 0.017 | 0.003 | 2.2E-09  | 0.0001 | 86.6   |
| TG | rs117877390 | 19 | 19378416 | t | 0.103 | 0.011 | 1.7E-21  | 0.0006 | 357.1  |
| TG | rs10401969  | 19 | 19407718 | t | 0.095 | 0.004 | 5.2E-150 | 0.0013 | 824.6  |
| TG | rs145702982 | 19 | 19579726 | a | 0.119 | 0.021 | 6.2E-09  | 0.0003 | 172.3  |
| TG | rs8182584   | 19 | 33909710 | t | 0.017 | 0.002 | 2.7E-15  | 0.0001 | 81.6   |
| TG | rs1688030   | 19 | 35556744 | t | 0.033 | 0.005 | 5.5E-13  | 0.0001 | 78.8   |
| TG | rs2018519   | 19 | 35559787 | t | 0.021 | 0.003 | 8.9E-11  | 0.0001 | 74.7   |
| TG | rs28399653  | 19 | 45315445 | a | 0.041 | 0.006 | 5.5E-12  | 0.0001 | 60.1   |
| TG | rs4803760   | 19 | 45333834 | t | 0.021 | 0.003 | 1.3E-11  | 0.0001 | 83.5   |
| TG | rs157582    | 19 | 45396219 | t | 0.042 | 0.004 | 7.5E-24  | 0.0006 | 383.4  |
| TG | rs439401    | 19 | 45414451 | t | 0.080 | 0.002 | 1.2E-229 | 0.0030 | 1869.3 |
| TG | rs59325138  | 19 | 45416291 | t | 0.040 | 0.003 | 1.2E-31  | 0.0008 | 469.6  |
| TG | rs7259004   | 19 | 45432557 | c | 0.064 | 0.005 | 2.3E-45  | 0.0008 | 463.7  |
| TG | rs2287922   | 19 | 49232226 | a | 0.018 | 0.002 | 4.0E-17  | 0.0002 | 96.4   |
| TG | rs1132990   | 19 | 50028163 | a | 0.018 | 0.003 | 4.2E-09  | 0.0001 | 63.0   |
| TG | rs6029143   | 20 | 39118662 | t | 0.035 | 0.005 | 8.6E-13  | 0.0001 | 92.4   |
| TG | rs6016381   | 20 | 39180436 | t | 0.018 | 0.002 | 8.4E-15  | 0.0001 | 92.0   |
| TG | rs1997833   | 20 | 39690342 | t | 0.016 | 0.003 | 1.2E-09  | 0.0001 | 61.0   |
| TG | rs3827066   | 20 | 44586023 | t | 0.043 | 0.004 | 4.3E-28  | 0.0005 | 308.0  |
| TG | rs8123864   | 20 | 44598670 | t | 0.044 | 0.003 | 2.0E-46  | 0.0009 | 535.9  |
| TG | rs1211644   | 20 | 45592842 | t | 0.024 | 0.003 | 2.8E-15  | 0.0002 | 131.0  |
| TG | rs2426428   | 20 | 50886412 | t | 0.031 | 0.005 | 2.3E-11  | 0.0001 | 92.2   |

|    |             |    |          |   |       |       |         |        |       |
|----|-------------|----|----------|---|-------|-------|---------|--------|-------|
| TG | rs6025606   | 20 | 56098733 | t | 0.013 | 0.002 | 7.4E-10 | 0.0001 | 48.3  |
| TG | rs41302559  | 20 | 56140439 | a | 0.145 | 0.021 | 1.8E-12 | 0.0001 | 61.9  |
| TG | rs114139997 | 21 | 46875775 | a | 0.365 | 0.039 | 2.9E-21 | 0.0003 | 180.4 |
| TG | rs200559406 | 21 | 46875817 | a | 0.282 | 0.036 | 6.6E-15 | 0.0001 | 78.5  |
| TG | rs35665085  | 22 | 17625915 | a | 0.032 | 0.005 | 1.9E-12 | 0.0001 | 61.4  |
| TG | rs738322    | 22 | 38569006 | a | 0.021 | 0.002 | 9.2E-26 | 0.0002 | 135.9 |
| TG | rs5757161   | 22 | 38990662 | a | 0.016 | 0.003 | 1.6E-10 | 0.0001 | 72.5  |
| TG | rs738409    | 22 | 44324727 | c | 0.017 | 0.002 | 4.0E-12 | 0.0001 | 59.6  |

**Supplementary Table 3. Trait-specific genetic instruments for blood lipid levels selected from the Global Lipids Genetics Consortium (GLGC) dataset. Variants were selected on the basis of their association with the respective trait at  $p < 5 \times 10^{-8}$  and a  $p > 0.01$  regarding their association with the other two traits.**

| Phenotype | SNP        | Eff_allele | Associations with HDL-C |       |          | Associations with LDL-C |       |          | Associations with TG |       |         |
|-----------|------------|------------|-------------------------|-------|----------|-------------------------|-------|----------|----------------------|-------|---------|
|           |            |            | Effect                  | SE    | P-value  | Effect                  | SE    | P-value  | Effect               | SE    | P-value |
| HDL-C     | rs103294   | t          | 0.052                   | 0.004 | 4.00E-30 | 0.007                   | 0.005 | 0.123    | -0.002               | 0.004 | 0.752   |
| HDL-C     | rs10773105 | t          | 0.036                   | 0.004 | 3.20E-24 | 0.006                   | 0.004 | 0.122    | 0.004                | 0.003 | 0.509   |
| HDL-C     | rs11246602 | c          | 0.034                   | 0.005 | 1.68E-10 | 0.002                   | 0.006 | 0.526    | -0.009               | 0.005 | 0.192   |
| HDL-C     | rs12226802 | g          | 0.033                   | 0.005 | 1.29E-09 | 0                       | 0.005 | 0.619    | -0.007               | 0.005 | 0.23    |
| HDL-C     | rs16942887 | a          | 0.083                   | 0.005 | 8.28E-54 | 0.001                   | 0.005 | 0.798    | -0.012               | 0.005 | 0.0296  |
| HDL-C     | rs17695224 | g          | 0.029                   | 0.004 | 2.42E-13 | 0.011                   | 0.004 | 0.0125   | -0.012               | 0.004 | 0.0113  |
| HDL-C     | rs181362   | c          | 0.038                   | 0.004 | 9.24E-18 | 0.007                   | 0.005 | 0.0793   | 0.009                | 0.004 | 0.0281  |
| HDL-C     | rs205262   | a          | 0.028                   | 0.004 | 3.88E-13 | 0.009                   | 0.004 | 0.0313   | -0.003               | 0.004 | 0.803   |
| HDL-C     | rs2240327  | g          | 0.024                   | 0.003 | 1.11E-11 | 0.001                   | 0.004 | 0.971    | -0.002               | 0.003 | 0.867   |
| HDL-C     | rs2241210  | g          | 0.033                   | 0.004 | 2.49E-20 | 0.008                   | 0.004 | 0.0855   | 0.003                | 0.003 | 0.247   |
| HDL-C     | rs2290547  | a          | -0.03                   | 0.005 | 3.69E-09 | 0.001                   | 0.005 | 0.793    | 0.01                 | 0.004 | 0.0221  |
| HDL-C     | rs2472509  | g          | 0.023                   | 0.004 | 1.21E-09 | 0                       | 0.004 | 0.708    | -0.002               | 0.004 | 0.722   |
| HDL-C     | rs2602836  | g          | 0.019                   | 0.003 | 4.96E-08 | 0.001                   | 0.004 | 0.831    | 0.009                | 0.003 | 0.0212  |
| HDL-C     | rs4650994  | a          | 0.021                   | 0.003 | 6.70E-09 | 0.003                   | 0.004 | 0.338    | 0.002                | 0.003 | 0.398   |
| HDL-C     | rs4917014  | g          | 0.022                   | 0.004 | 1.03E-08 | 0.005                   | 0.004 | 0.246    | -0.001               | 0.004 | 0.887   |
| HDL-C     | rs4983559  | g          | 0.02                    | 0.004 | 9.57E-09 | 0.003                   | 0.004 | 0.583    | 0                    | 0.004 | 0.971   |
| HDL-C     | rs499974   | a          | 0.026                   | 0.004 | 1.12E-08 | 0.001                   | 0.005 | 0.826    | -0.009               | 0.004 | 0.0541  |
| HDL-C     | rs702485   | g          | 0.024                   | 0.003 | 6.45E-12 | 0.001                   | 0.004 | 0.787    | -0.002               | 0.003 | 0.475   |
| HDL-C     | rs838876   | g          | 0.049                   | 0.004 | 7.33E-33 | 0.003                   | 0.004 | 0.442    | 0.005                | 0.004 | 0.377   |
| LDL-C     | rs1010167  | g          | 0.004                   | 0.004 | 0.396    | 0.025                   | 0.004 | 6.22E-11 | 0.002                | 0.004 | 0.808   |
| LDL-C     | rs11563251 | t          | 0.006                   | 0.006 | 0.365    | 0.035                   | 0.006 | 4.50E-08 | 0.008                | 0.006 | 0.0826  |
| LDL-C     | rs1250229  | c          | 0.003                   | 0.004 | 0.404    | 0.024                   | 0.004 | 3.13E-08 | 0.009                | 0.004 | 0.0139  |
| LDL-C     | rs12670798 | c          | 0.001                   | 0.004 | 0.733    | 0.034                   | 0.004 | 4.81E-14 | 0.01                 | 0.004 | 0.0168  |
| LDL-C     | rs16831243 | t          | 0.011                   | 0.005 | 0.039    | 0.038                   | 0.006 | 9.06E-12 | -0.001               | 0.005 | 0.987   |
| LDL-C     | rs17508045 | t          | 0.009                   | 0.006 | 0.0466   | 0.049                   | 0.007 | 4.91E-12 | -0.008               | 0.006 | 0.4     |
| LDL-C     | rs1800562  | g          | 0.007                   | 0.007 | 0.242    | 0.062                   | 0.008 | 8.25E-14 | -0.013               | 0.007 | 0.172   |
| LDL-C     | rs2030746  | t          | 0.003                   | 0.004 | 0.306    | 0.021                   | 0.004 | 8.61E-09 | 0.003                | 0.004 | 0.491   |
| LDL-C     | rs2294261  | a          | 0.009                   | 0.004 | 0.0206   | 0.033                   | 0.004 | 6.57E-17 | 0.002                | 0.003 | 0.587   |
| LDL-C     | rs2328223  | c          | 0                       | 0.005 | 0.859    | 0.03                    | 0.005 | 5.63E-09 | -0.007               | 0.005 | 0.115   |
| LDL-C     | rs314253   | t          | 0.003                   | 0.004 | 0.353    | 0.024                   | 0.004 | 3.44E-10 | 0.009                | 0.003 | 0.0298  |
| LDL-C     | rs364585   | g          | 0.001                   | 0.004 | 0.822    | 0.025                   | 0.004 | 4.28E-10 | -0.002               | 0.003 | 0.44    |
| LDL-C     | rs3780181  | a          | 0.004                   | 0.007 | 0.542    | 0.045                   | 0.007 | 1.76E-09 | -0.007               | 0.007 | 0.491   |
| LDL-C     | rs4148218  | g          | 0.003                   | 0.004 | 0.456    | 0.044                   | 0.005 | 6.76E-21 | 0.004                | 0.004 | 0.295   |
| LDL-C     | rs4530754  | a          | 0.001                   | 0.003 | 0.934    | 0.028                   | 0.004 | 3.58E-12 | 0.002                | 0.003 | 0.742   |
| LDL-C     | rs6065311  | c          | 0.002                   | 0.003 | 0.437    | 0.042                   | 0.004 | 1.66E-30 | 0.006                | 0.003 | 0.0227  |
| LDL-C     | rs6489818  | a          | 0                       | 0.005 | 0.928    | 0.028                   | 0.005 | 4.57E-09 | -0.004               | 0.004 | 0.54    |
| LDL-C     | rs6603981  | t          | 0.004                   | 0.004 | 0.381    | 0.034                   | 0.004 | 3.10E-13 | 0.007                | 0.004 | 0.174   |
| LDL-C     | rs7225700  | c          | 0.01                    | 0.004 | 0.0235   | 0.03                    | 0.004 | 3.56E-13 | -0.005               | 0.004 | 0.236   |
| LDL-C     | rs7703051  | a          | 0.002                   | 0.004 | 0.421    | 0.073                   | 0.004 | 1.40E-77 | 0.006                | 0.003 | 0.163   |
| LDL-C     | rs7832643  | t          | 0.001                   | 0.004 | 0.595    | 0.034                   | 0.004 | 2.67E-17 | 0.002                | 0.003 | 0.472   |
| LDL-C     | rs7832643  | t          | 0.001                   | 0.004 | 0.595    | 0.034                   | 0.004 | 2.67E-17 | 0.002                | 0.003 | 0.472   |
| LDL-C     | rs8017377  | a          | 0.004                   | 0.004 | 0.434    | 0.03                    | 0.004 | 2.52E-15 | 0.006                | 0.004 | 0.142   |
| LDL-C     | rs8176720  | t          | 0.001                   | 0.004 | 0.943    | 0.033                   | 0.004 | 1.59E-17 | -0.007               | 0.004 | 0.0609  |
| LDL-C     | rs903319   | c          | 0.01                    | 0.004 | 0.0122   | 0.027                   | 0.004 | 5.22E-11 | -0.005               | 0.004 | 0.138   |

|    |            |   |            |       |        |       |       |        |       |       |          |
|----|------------|---|------------|-------|--------|-------|-------|--------|-------|-------|----------|
| TG | rs10029254 | t | -<br>0.009 | 0.004 | 0.0487 | 0.006 | 0.004 | 0.205  | 0.027 | 0.004 | 7.55E-09 |
| TG | rs1781930  | g | 0.002      | 0.005 | 0.625  | 0.01  | 0.005 | 0.057  | 0.031 | 0.004 | 2.51E-11 |
| TG | rs603446   | c | -<br>0.002 | 0.004 | 0.873  | 0.009 | 0.004 | 0.0114 | 0.05  | 0.003 | 3.92E-43 |
| TG | rs9693857  | c | 0.004      | 0.004 | 0.527  | 0.005 | 0.004 | 0.298  | -0.02 | 0.003 | 1.69E-08 |

**Supplementary Table 4. Genetic instruments for the circulating cholesterol and triglyceride concentrations of the lipoprotein particles as selected and extracted from the dataset of the GWAS meta-analysis on Nuclear Magnetic Resonance (NMR)-measured circulating metabolites.**

| Metabolite | SNP         | Chr | Position (hg18) | Eff_allele | Effect | SE    | P-value  | R2     | F     |
|------------|-------------|-----|-----------------|------------|--------|-------|----------|--------|-------|
| L.HDL.C    | rs1077835   | 15  | 58723426        | G          | 0.181  | 0.012 | 1.39E-53 | 0.0122 | 265.5 |
| L.HDL.C    | rs11076174  | 16  | 57003146        | C          | 0.134  | 0.016 | 1.17E-16 | 0.0035 | 76.7  |
| L.HDL.C    | rs11076176  | 16  | 57007446        | G          | 0.171  | 0.014 | 1.62E-34 | 0.0081 | 176.2 |
| L.HDL.C    | rs111543310 | 15  | 59531818        | C          | 0.338  | 0.049 | 6.88E-12 | 0.0036 | 69.2  |
| L.HDL.C    | rs112835635 | 15  | 59351989        | G          | 0.263  | 0.035 | 2.13E-13 | 0.0031 | 63.2  |
| L.HDL.C    | rs112884731 | 15  | 59504897        | C          | 0.544  | 0.057 | 2.75E-21 | 0.0055 | 98.4  |
| L.HDL.C    | rs113298164 | 15  | 58855748        | T          | 0.584  | 0.047 | 2.74E-34 | 0.0092 | 165.4 |
| L.HDL.C    | rs116142092 | 15  | 59751872        | T          | 0.383  | 0.050 | 5.61E-14 | 0.0034 | 61.4  |
| L.HDL.C    | rs11633043  | 15  | 58837722        | A          | 0.078  | 0.014 | 2.57E-08 | 0.0017 | 36.4  |
| L.HDL.C    | rs117901517 | 15  | 58678869        | C          | 0.142  | 0.023 | 5.22E-10 | 0.0030 | 58.2  |
| L.HDL.C    | rs1318175   | 15  | 58586129        | T          | 0.087  | 0.013 | 5.41E-11 | 0.0022 | 47.1  |
| L.HDL.C    | rs1367117   | 2   | 21263900        | A          | 0.063  | 0.011 | 1.50E-08 | 0.0016 | 35.1  |
| L.HDL.C    | rs1373657   | 15  | 58717762        | T          | 0.165  | 0.030 | 4.42E-08 | 0.0021 | 38.2  |
| L.HDL.C    | rs138690293 | 15  | 59310760        | C          | 0.722  | 0.107 | 2.61E-11 | 0.0039 | 62.4  |
| L.HDL.C    | rs142855631 | 15  | 59286876        | T          | 0.737  | 0.108 | 1.33E-11 | 0.0039 | 63.1  |
| L.HDL.C    | rs146842281 | 15  | 59356659        | T          | 0.154  | 0.022 | 3.53E-12 | 0.0027 | 52.8  |
| L.HDL.C    | rs148902553 | 15  | 59776836        | C          | 0.388  | 0.051 | 3.48E-14 | 0.0036 | 62.1  |
| L.HDL.C    | rs16940472  | 15  | 58835317        | A          | 0.130  | 0.020 | 2.49E-10 | 0.0026 | 56.9  |
| L.HDL.C    | rs16940810  | 15  | 59115159        | T          | 0.252  | 0.030 | 5.86E-17 | 0.0038 | 77.2  |
| L.HDL.C    | rs17301746  | 15  | 58731395        | T          | 0.265  | 0.038 | 5.18E-12 | 0.0029 | 63.1  |
| L.HDL.C    | rs174583    | 11  | 61609750        | T          | 0.078  | 0.010 | 2.92E-14 | 0.0029 | 62.4  |
| L.HDL.C    | rs17821274  | 15  | 58684478        | C          | 0.086  | 0.010 | 3.91E-16 | 0.0033 | 72.3  |
| L.HDL.C    | rs17821298  | 15  | 58690738        | A          | 0.092  | 0.012 | 7.20E-15 | 0.0030 | 65.7  |
| L.HDL.C    | rs1800777   | 16  | 57017319        | A          | 0.234  | 0.035 | 4.04E-11 | 0.0027 | 51.6  |
| L.HDL.C    | rs181412360 | 15  | 59158953        | C          | 0.378  | 0.038 | 6.01E-23 | 0.0059 | 106.4 |
| L.HDL.C    | rs182776276 | 15  | 59254589        | G          | 0.573  | 0.060 | 2.84E-21 | 0.0056 | 96.2  |
| L.HDL.C    | rs183975744 | 15  | 59052479        | T          | 0.747  | 0.120 | 7.21E-10 | 0.0028 | 43.1  |
| L.HDL.C    | rs185241689 | 15  | 59143155        | G          | 0.810  | 0.114 | 1.96E-12 | 0.0039 | 64.0  |
| L.HDL.C    | rs185481    | 15  | 58666679        | C          | 0.069  | 0.010 | 2.68E-11 | 0.0024 | 51.0  |
| L.HDL.C    | rs186924495 | 20  | 44686926        | T          | 0.207  | 0.037 | 3.38E-08 | 0.0018 | 32.6  |
| L.HDL.C    | rs1883025   | 9   | 107664301       | T          | 0.072  | 0.012 | 9.85E-09 | 0.0016 | 35.1  |
| L.HDL.C    | rs189375934 | 15  | 60196526        | G          | 0.310  | 0.053 | 6.61E-09 | 0.0022 | 38.1  |
| L.HDL.C    | rs189418461 | 15  | 59725202        | G          | 0.379  | 0.050 | 5.52E-14 | 0.0034 | 61.2  |
| L.HDL.C    | rs192630343 | 15  | 59286102        | A          | 0.708  | 0.107 | 5.45E-11 | 0.0038 | 62.1  |
| L.HDL.C    | rs247617    | 16  | 56990716        | A          | 0.210  | 0.011 | 1.93E-82 | 0.0184 | 403.3 |
| L.HDL.C    | rs261291    | 15  | 58680178        | C          | 0.179  | 0.010 | 2.39E-68 | 0.0151 | 329.4 |
| L.HDL.C    | rs28370984  | 15  | 58629308        | C          | 0.177  | 0.032 | 3.98E-08 | 0.0017 | 33.7  |
| L.HDL.C    | rs291       | 8   | 19815852        | C          | 0.101  | 0.012 | 1.45E-17 | 0.0036 | 77.8  |
| L.HDL.C    | rs34718390  | 15  | 58682690        | A          | 0.156  | 0.024 | 6.31E-11 | 0.0028 | 61.5  |
| L.HDL.C    | rs35547826  | 15  | 58720405        | A          | 0.084  | 0.014 | 7.63E-09 | 0.0017 | 37.6  |
| L.HDL.C    | rs429358    | 19  | 45411941        | C          | 0.092  | 0.013 | 1.46E-11 | 0.0024 | 51.1  |
| L.HDL.C    | rs435306    | 20  | 44538484        | T          | 0.073  | 0.011 | 2.88E-10 | 0.0020 | 42.2  |
| L.HDL.C    | rs517755    | 19  | 45009036        | C          | 0.229  | 0.041 | 3.58E-08 | 0.0019 | 36.8  |
| L.HDL.C    | rs55995508  | 16  | 56827946        | A          | 0.159  | 0.025 | 4.93E-10 | 0.0023 | 44.6  |
| L.HDL.C    | rs6065904   | 20  | 44534651        | A          | 0.135  | 0.012 | 1.72E-30 | 0.0065 | 140.2 |

|         |             |    |           |   |       |       |          |        |       |
|---------|-------------|----|-----------|---|-------|-------|----------|--------|-------|
| L.HDL.C | rs6499857   | 16 | 56935090  | C | 0.067 | 0.012 | 3.70E-08 | 0.0015 | 32.8  |
| L.HDL.C | rs6507939   | 18 | 47176261  | C | 0.095 | 0.013 | 3.34E-12 | 0.0024 | 51.2  |
| L.HDL.C | rs6544366   | 2  | 21204025  | T | 0.064 | 0.011 | 8.14E-09 | 0.0016 | 34.8  |
| L.HDL.C | rs67053123  | 12 | 125353810 | A | 0.092 | 0.015 | 3.90E-10 | 0.0021 | 46.3  |
| L.HDL.C | rs73959582  | 18 | 47148886  | C | 0.079 | 0.014 | 4.62E-08 | 0.0016 | 35.2  |
| L.HDL.C | rs7412      | 19 | 45412079  | T | 0.158 | 0.025 | 8.48E-10 | 0.0026 | 48.2  |
| L.HDL.C | rs75835816  | 8  | 19885513  | C | 0.293 | 0.038 | 2.87E-14 | 0.0033 | 63.3  |
| L.HDL.C | rs76083992  | 20 | 44544798  | T | 0.229 | 0.032 | 2.01E-12 | 0.0026 | 51.8  |
| L.HDL.C | rs76116860  | 15 | 59834938  | C | 0.277 | 0.041 | 2.66E-11 | 0.0027 | 52.2  |
| L.HDL.C | rs79844529  | 15 | 58445279  | T | 0.190 | 0.032 | 3.43E-09 | 0.0024 | 45.8  |
| L.HDL.C | rs8042174   | 15 | 58685970  | C | 0.112 | 0.020 | 2.10E-08 | 0.0018 | 38.0  |
| L.HDL.C | rs938507    | 15 | 58582034  | A | 0.101 | 0.014 | 2.89E-12 | 0.0024 | 51.2  |
| L.HDL.C | rs964184    | 11 | 116648917 | C | 0.082 | 0.014 | 8.07E-09 | 0.0016 | 34.5  |
| M.LDL.C | rs10424477  | 19 | 10636051  | T | 0.071 | 0.011 | 1.53E-09 | 0.0021 | 46.4  |
| M.LDL.C | rs111740198 | 19 | 44878217  | A | 0.321 | 0.052 | 1.22E-09 | 0.0033 | 48.4  |
| M.LDL.C | rs112635299 | 14 | 94838142  | T | 0.237 | 0.040 | 4.03E-09 | 0.0020 | 39.4  |
| M.LDL.C | rs11587071  | 1  | 55522674  | T | 0.092 | 0.014 | 1.95E-11 | 0.0023 | 49.1  |
| M.LDL.C | rs116054287 | 1  | 56401689  | C | 0.397 | 0.038 | 4.41E-25 | 0.0058 | 126.0 |
| M.LDL.C | rs117261169 | 19 | 45491032  | T | 0.361 | 0.055 | 1.44E-10 | 0.0025 | 48.6  |
| M.LDL.C | rs117569256 | 19 | 45423330  | G | 0.821 | 0.107 | 4.27E-14 | 0.0068 | 91.9  |
| M.LDL.C | rs11878174  | 19 | 45723379  | C | 0.073 | 0.012 | 6.11E-10 | 0.0026 | 51.0  |
| M.LDL.C | rs12043403  | 1  | 55431933  | C | 0.138 | 0.018 | 3.27E-14 | 0.0038 | 73.8  |
| M.LDL.C | rs12086676  | 1  | 55738663  | T | 0.076 | 0.013 | 2.68E-09 | 0.0018 | 38.8  |
| M.LDL.C | rs12916     | 5  | 74656539  | C | 0.084 | 0.010 | 1.86E-16 | 0.0034 | 73.7  |
| M.LDL.C | rs137992968 | 19 | 11239696  | T | 0.204 | 0.034 | 3.32E-09 | 0.0018 | 39.1  |
| M.LDL.C | rs138270540 | 4  | 75353427  | C | 0.226 | 0.036 | 9.95E-10 | 0.0025 | 46.3  |
| M.LDL.C | rs138287365 | 4  | 74781004  | C | 0.373 | 0.050 | 2.70E-13 | 0.0037 | 68.3  |
| M.LDL.C | rs138525976 | 1  | 55960656  | A | 0.103 | 0.018 | 2.24E-08 | 0.0017 | 35.7  |
| M.LDL.C | rs140339333 | 4  | 75396456  | A | 0.288 | 0.045 | 2.32E-10 | 0.0030 | 55.3  |
| M.LDL.C | rs140411770 | 19 | 45356517  | A | 0.542 | 0.088 | 1.58E-09 | 0.0049 | 76.2  |
| M.LDL.C | rs142130958 | 19 | 11190652  | A | 0.221 | 0.016 | 2.19E-40 | 0.0092 | 200.6 |
| M.LDL.C | rs143413051 | 4  | 75560225  | T | 0.381 | 0.055 | 1.05E-11 | 0.0034 | 57.9  |
| M.LDL.C | rs143736900 | 4  | 72871285  | C | 0.594 | 0.083 | 2.35E-12 | 0.0045 | 71.5  |
| M.LDL.C | rs144591518 | 19 | 10518992  | T | 0.194 | 0.034 | 3.05E-08 | 0.0016 | 34.0  |
| M.LDL.C | rs144721118 | 1  | 54196340  | A | 0.270 | 0.040 | 1.94E-11 | 0.0034 | 65.0  |
| M.LDL.C | rs146568567 | 1  | 54824117  | A | 0.315 | 0.032 | 1.24E-22 | 0.0054 | 104.9 |
| M.LDL.C | rs147319495 | 2  | 20912953  | G | 0.064 | 0.011 | 8.09E-09 | 0.0017 | 36.9  |
| M.LDL.C | rs147825223 | 19 | 45479553  | C | 0.173 | 0.028 | 1.92E-09 | 0.0022 | 39.8  |
| M.LDL.C | rs148359521 | 2  | 21414212  | T | 0.187 | 0.032 | 8.31E-09 | 0.0020 | 39.0  |
| M.LDL.C | rs148382396 | 1  | 54639713  | A | 0.390 | 0.051 | 5.53E-14 | 0.0044 | 70.1  |
| M.LDL.C | rs149048538 | 19 | 45053024  | A | 0.282 | 0.044 | 1.91E-10 | 0.0025 | 47.8  |
| M.LDL.C | rs149844719 | 1  | 54519237  | T | 0.183 | 0.028 | 1.18E-10 | 0.0023 | 50.7  |
| M.LDL.C | rs149944945 | 1  | 56129361  | G | 0.292 | 0.034 | 3.47E-17 | 0.0043 | 82.3  |
| M.LDL.C | rs150785555 | 1  | 56005603  | A | 0.451 | 0.036 | 1.28E-35 | 0.0090 | 175.6 |
| M.LDL.C | rs150966173 | 19 | 45421204  | T | 0.225 | 0.039 | 1.01E-08 | 0.0020 | 39.4  |
| M.LDL.C | rs150985779 | 19 | 45147992  | T | 0.269 | 0.038 | 2.86E-12 | 0.0031 | 59.1  |
| M.LDL.C | rs151193598 | 4  | 73303394  | A | 0.634 | 0.087 | 8.45E-13 | 0.0061 | 82.8  |
| M.LDL.C | rs157594    | 19 | 45425175  | G | 0.133 | 0.012 | 4.31E-29 | 0.0086 | 167.0 |



|         |             |    |           |   |       |       |          |        |       |
|---------|-------------|----|-----------|---|-------|-------|----------|--------|-------|
| M.LDL.C | rs17111503  | 1  | 55503448  | G | 0.075 | 0.013 | 1.34E-08 | 0.0018 | 39.6  |
| M.LDL.C | rs17395160  | 1  | 55085141  | G | 0.086 | 0.012 | 2.42E-12 | 0.0025 | 53.1  |
| M.LDL.C | rs180961170 | 1  | 57012269  | G | 0.364 | 0.052 | 4.27E-12 | 0.0037 | 65.6  |
| M.LDL.C | rs181066897 | 4  | 73499882  | C | 0.515 | 0.080 | 2.30E-10 | 0.0041 | 66.1  |
| M.LDL.C | rs181169081 | 2  | 21312870  | A | 0.185 | 0.032 | 1.07E-08 | 0.0020 | 38.2  |
| M.LDL.C | rs181594442 | 1  | 57006537  | A | 0.364 | 0.052 | 4.33E-12 | 0.0037 | 65.6  |
| M.LDL.C | rs181847072 | 4  | 73134560  | G | 0.592 | 0.083 | 1.85E-12 | 0.0046 | 72.3  |
| M.LDL.C | rs182300850 | 1  | 54389320  | C | 0.371 | 0.060 | 1.06E-09 | 0.0032 | 48.4  |
| M.LDL.C | rs182318839 | 19 | 45747128  | T | 0.300 | 0.054 | 3.77E-08 | 0.0027 | 47.3  |
| M.LDL.C | rs184566992 | 19 | 44887996  | T | 0.353 | 0.052 | 2.52E-11 | 0.0037 | 58.6  |
| M.LDL.C | rs184650103 | 4  | 74850649  | T | 0.406 | 0.047 | 2.78E-17 | 0.0045 | 77.6  |
| M.LDL.C | rs185049786 | 4  | 74644512  | C | 0.335 | 0.054 | 1.08E-09 | 0.0034 | 62.6  |
| M.LDL.C | rs185415345 | 1  | 56625395  | A | 0.168 | 0.027 | 1.48E-09 | 0.0025 | 48.2  |
| M.LDL.C | rs185802315 | 19 | 10777054  | G | 0.231 | 0.036 | 2.50E-10 | 0.0025 | 44.8  |
| M.LDL.C | rs185886292 | 19 | 45565918  | T | 0.184 | 0.032 | 1.51E-08 | 0.0021 | 37.3  |
| M.LDL.C | rs186538116 | 1  | 56840574  | C | 0.421 | 0.045 | 1.49E-20 | 0.0059 | 105.9 |
| M.LDL.C | rs188099946 | 19 | 45189605  | T | 0.296 | 0.045 | 1.06E-10 | 0.0022 | 48.6  |
| M.LDL.C | rs189409600 | 19 | 45341066  | T | 0.749 | 0.103 | 8.32E-13 | 0.0060 | 83.6  |
| M.LDL.C | rs189718275 | 19 | 45063850  | A | 0.296 | 0.044 | 3.75E-11 | 0.0028 | 53.2  |
| M.LDL.C | rs190217562 | 4  | 75180409  | C | 0.251 | 0.035 | 1.36E-12 | 0.0059 | 106.0 |
| M.LDL.C | rs190934192 | 1  | 55334001  | A | 0.385 | 0.040 | 2.23E-21 | 0.0069 | 134.8 |
| M.LDL.C | rs191210370 | 1  | 54236244  | G | 0.212 | 0.038 | 3.42E-08 | 0.0021 | 40.7  |
| M.LDL.C | rs191404723 | 1  | 54636232  | T | 0.390 | 0.051 | 4.44E-14 | 0.0041 | 71.1  |
| M.LDL.C | rs191448950 | 1  | 55584844  | A | 0.484 | 0.032 | 1.80E-51 | 0.0111 | 243.0 |
| M.LDL.C | rs192012905 | 19 | 44463485  | G | 0.340 | 0.053 | 1.93E-10 | 0.0029 | 52.4  |
| M.LDL.C | rs192570155 | 1  | 55246601  | C | 0.492 | 0.045 | 4.04E-27 | 0.0085 | 152.5 |
| M.LDL.C | rs193084249 | 1  | 26987646  | G | 0.182 | 0.031 | 1.04E-08 | 0.0021 | 39.7  |
| M.LDL.C | rs2007708   | 19 | 45410420  | A | 0.831 | 0.104 | 3.41E-15 | 0.0054 | 99.4  |
| M.LDL.C | rs207176    | 1  | 55791846  | T | 0.121 | 0.017 | 2.14E-12 | 0.0026 | 55.4  |
| M.LDL.C | rs2207132   | 20 | 39142516  | A | 0.137 | 0.025 | 3.69E-08 | 0.0021 | 40.8  |
| M.LDL.C | rs2927472   | 19 | 45349369  | C | 0.151 | 0.018 | 6.13E-17 | 0.0041 | 88.8  |
| M.LDL.C | rs2965149   | 19 | 45190766  | C | 0.069 | 0.011 | 1.57E-10 | 0.0022 | 47.7  |
| M.LDL.C | rs2967668   | 19 | 45302951  | G | 0.178 | 0.017 | 4.32E-25 | 0.0071 | 137.2 |
| M.LDL.C | rs2980875   | 8  | 126481747 | G | 0.058 | 0.010 | 5.86E-09 | 0.0017 | 36.1  |
| M.LDL.C | rs312030    | 2  | 21462743  | C | 0.108 | 0.018 | 1.25E-09 | 0.0019 | 41.9  |
| M.LDL.C | rs3185010   | 19 | 11275842  | A | 0.064 | 0.011 | 5.50E-09 | 0.0017 | 37.0  |
| M.LDL.C | rs34722314  | 2  | 21271707  | A | 0.124 | 0.014 | 6.82E-18 | 0.0037 | 80.2  |
| M.LDL.C | rs3741298   | 11 | 116657561 | T | 0.072 | 0.012 | 1.49E-09 | 0.0018 | 39.1  |
| M.LDL.C | rs429358    | 19 | 45411941  | C | 0.220 | 0.013 | 2.46E-59 | 0.0136 | 298.2 |
| M.LDL.C | rs4609471   | 1  | 55493584  | A | 0.382 | 0.030 | 8.83E-37 | 0.0113 | 220.5 |
| M.LDL.C | rs4803748   | 19 | 45247048  | T | 0.080 | 0.011 | 1.32E-13 | 0.0030 | 65.5  |
| M.LDL.C | rs55810502  | 5  | 74380959  | G | 0.070 | 0.012 | 8.93E-09 | 0.0017 | 36.5  |
| M.LDL.C | rs58826447  | 19 | 45328379  | A | 0.070 | 0.011 | 1.05E-10 | 0.0022 | 48.3  |
| M.LDL.C | rs62117161  | 19 | 45233385  | G | 0.206 | 0.020 | 1.98E-24 | 0.0054 | 117.5 |
| M.LDL.C | rs62120794  | 2  | 21100426  | T | 0.177 | 0.024 | 4.41E-13 | 0.0028 | 56.8  |
| M.LDL.C | rs629301    | 1  | 109818306 | T | 0.126 | 0.012 | 1.62E-25 | 0.0055 | 118.9 |
| M.LDL.C | rs6511721   | 19 | 11206575  | A | 0.092 | 0.011 | 6.23E-17 | 0.0042 | 91.7  |
| M.LDL.C | rs6663252   | 1  | 55630151  | C | 0.084 | 0.012 | 1.01E-11 | 0.0024 | 51.1  |

|         |             |    |           |   |       |       |          |        |       |
|---------|-------------|----|-----------|---|-------|-------|----------|--------|-------|
| M.LDL.C | rs6732011   | 2  | 21146521  | T | 0.059 | 0.010 | 6.73E-09 | 0.0016 | 35.4  |
| M.LDL.C | rs6859      | 19 | 45382034  | G | 0.080 | 0.010 | 1.10E-15 | 0.0032 | 69.1  |
| M.LDL.C | rs7255743   | 19 | 46018119  | A | 0.178 | 0.032 | 4.50E-08 | 0.0016 | 35.0  |
| M.LDL.C | rs73048351  | 19 | 45160086  | A | 0.415 | 0.064 | 2.47E-10 | 0.0030 | 58.3  |
| M.LDL.C | rs73066442  | 7  | 21592973  | G | 0.071 | 0.011 | 8.03E-10 | 0.0019 | 40.9  |
| M.LDL.C | rs73556990  | 19 | 44888175  | G | 0.326 | 0.052 | 8.98E-10 | 0.0036 | 50.7  |
| M.LDL.C | rs73564218  | 19 | 45665952  | C | 0.173 | 0.030 | 1.27E-08 | 0.0020 | 35.4  |
| M.LDL.C | rs74073060  | 1  | 55638930  | A | 0.478 | 0.037 | 1.28E-36 | 0.0098 | 190.3 |
| M.LDL.C | rs7412      | 19 | 45412079  | T | 0.565 | 0.025 | #####    | 0.0338 | 638.4 |
| M.LDL.C | rs75647206  | 1  | 56947591  | T | 0.365 | 0.050 | 6.08E-13 | 0.0035 | 67.7  |
| M.LDL.C | rs7604788   | 2  | 21190024  | T | 0.176 | 0.022 | 3.01E-15 | 0.0033 | 72.3  |
| M.LDL.C | rs76670936  | 19 | 45196581  | A | 0.145 | 0.018 | 1.18E-14 | 0.0034 | 74.4  |
| M.LDL.C | rs76866386  | 2  | 44075483  | C | 0.142 | 0.018 | 1.42E-14 | 0.0029 | 63.2  |
| M.LDL.C | rs77021821  | 4  | 75684215  | T | 0.251 | 0.041 | 1.71E-09 | 0.0023 | 42.2  |
| M.LDL.C | rs78620068  | 2  | 21524000  | A | 0.115 | 0.017 | 7.72E-11 | 0.0022 | 47.6  |
| M.LDL.C | rs79668907  | 19 | 11257169  | T | 0.091 | 0.012 | 7.58E-13 | 0.0031 | 66.3  |
| M.LDL.C | rs79890446  | 19 | 45723446  | T | 0.234 | 0.033 | 2.89E-12 | 0.0034 | 65.8  |
| M.LDL.C | rs8106814   | 19 | 45441608  | C | 0.101 | 0.014 | 4.47E-12 | 0.0035 | 68.2  |
| M.LDL.C | rs8111962   | 19 | 10915324  | T | 0.095 | 0.014 | 1.59E-11 | 0.0023 | 49.6  |
| M.LDL.C | rs934197    | 2  | 21267461  | A | 0.113 | 0.011 | 3.50E-24 | 0.0052 | 113.4 |
| M.LDL.C | rs984976    | 5  | 74910870  | G | 0.075 | 0.010 | 1.30E-13 | 0.0027 | 59.0  |
| IDL.TG  | rs10495713  | 2  | 21200519  | G | 0.062 | 0.010 | 2.48E-09 | 0.0019 | 37.2  |
| IDL.TG  | rs113105798 | 15 | 59301460  | A | 0.198 | 0.036 | 4.06E-08 | 0.0018 | 35.2  |
| IDL.TG  | rs113298164 | 15 | 58855748  | T | 0.395 | 0.047 | 2.42E-16 | 0.0042 | 75.3  |
| IDL.TG  | rs113531395 | 17 | 4886829   | T | 0.246 | 0.036 | 2.44E-11 | 0.0031 | 59.4  |
| IDL.TG  | rs114822153 | 4  | 73238544  | A | 0.244 | 0.043 | 1.68E-08 | 0.0025 | 48.0  |
| IDL.TG  | rs115849089 | 8  | 19912370  | A | 0.098 | 0.017 | 2.05E-08 | 0.0017 | 33.7  |
| IDL.TG  | rs116054287 | 1  | 56401689  | C | 0.282 | 0.038 | 5.00E-13 | 0.0031 | 60.0  |
| IDL.TG  | rs116302332 | 4  | 75370891  | T | 0.257 | 0.040 | 1.90E-10 | 0.0028 | 54.7  |
| IDL.TG  | rs11633043  | 15 | 58837722  | A | 0.079 | 0.014 | 4.38E-08 | 0.0018 | 34.4  |
| IDL.TG  | rs116802199 | 17 | 4801101   | C | 0.235 | 0.032 | 3.08E-13 | 0.0031 | 58.1  |
| IDL.TG  | rs1168041   | 1  | 62960250  | C | 0.084 | 0.012 | 1.96E-12 | 0.0028 | 53.9  |
| IDL.TG  | rs117749052 | 15 | 58749309  | C | 0.216 | 0.037 | 9.78E-09 | 0.0027 | 51.9  |
| IDL.TG  | rs118095054 | 19 | 19621301  | G | 0.137 | 0.024 | 1.34E-08 | 0.0022 | 42.5  |
| IDL.TG  | rs12043403  | 1  | 55431933  | C | 0.101 | 0.018 | 3.23E-08 | 0.0020 | 39.2  |
| IDL.TG  | rs1268353   | 11 | 116639692 | T | 0.064 | 0.011 | 1.66E-09 | 0.0020 | 37.9  |
| IDL.TG  | rs1318175   | 15 | 58586129  | T | 0.088 | 0.014 | 2.89E-10 | 0.0022 | 42.6  |
| IDL.TG  | rs13329672  | 15 | 58699937  | T | 0.086 | 0.012 | 9.82E-13 | 0.0029 | 55.6  |
| IDL.TG  | rs138195472 | 15 | 58672107  | T | 0.223 | 0.035 | 3.10E-10 | 0.0025 | 44.3  |
| IDL.TG  | rs138287365 | 4  | 74781004  | C | 0.407 | 0.049 | 3.37E-16 | 0.0044 | 85.3  |
| IDL.TG  | rs140250995 | 4  | 73723860  | C | 0.636 | 0.100 | 3.37E-10 | 0.0035 | 64.6  |
| IDL.TG  | rs140339333 | 4  | 75396456  | A | 0.309 | 0.044 | 4.64E-12 | 0.0034 | 65.8  |
| IDL.TG  | rs143413051 | 4  | 75560225  | T | 0.404 | 0.055 | 3.05E-13 | 0.0037 | 66.9  |
| IDL.TG  | rs143736900 | 4  | 72871285  | C | 0.692 | 0.082 | 1.08E-16 | 0.0060 | 100.2 |
| IDL.TG  | rs145347194 | 15 | 58670135  | C | 0.135 | 0.023 | 3.51E-09 | 0.0024 | 46.2  |
| IDL.TG  | rs146568567 | 1  | 54824117  | A | 0.208 | 0.032 | 1.02E-10 | 0.0024 | 45.7  |
| IDL.TG  | rs146842281 | 15 | 59356659  | T | 0.146 | 0.022 | 6.31E-11 | 0.0024 | 47.1  |
| IDL.TG  | rs149297353 | 19 | 20115517  | G | 0.192 | 0.030 | 2.02E-10 | 0.0026 | 50.9  |

|        |             |    |           |   |       |       |          |        |       |
|--------|-------------|----|-----------|---|-------|-------|----------|--------|-------|
| IDL.TG | rs149944945 | 1  | 56129361  | G | 0.248 | 0.034 | 9.23E-13 | 0.0031 | 59.1  |
| IDL.TG | rs150392353 | 2  | 21320317  | C | 0.228 | 0.032 | 1.93E-12 | 0.0030 | 58.2  |
| IDL.TG | rs150536132 | 19 | 19679560  | T | 0.183 | 0.030 | 1.13E-09 | 0.0028 | 50.4  |
| IDL.TG | rs150785555 | 1  | 56005603  | A | 0.328 | 0.036 | 1.74E-19 | 0.0048 | 92.2  |
| IDL.TG | rs151193598 | 4  | 73303394  | A | 0.658 | 0.085 | 3.13E-14 | 0.0066 | 94.0  |
| IDL.TG | rs1532085   | 15 | 58683366  | G | 0.156 | 0.010 | 8.71E-49 | 0.0117 | 229.0 |
| IDL.TG | rs157594    | 19 | 45425175  | G | 0.126 | 0.012 | 4.34E-26 | 0.0077 | 148.6 |
| IDL.TG | rs1663255   | 15 | 58514242  | T | 0.071 | 0.011 | 2.41E-10 | 0.0022 | 42.6  |
| IDL.TG | rs16940213  | 15 | 58695337  | T | 0.126 | 0.013 | 1.70E-20 | 0.0046 | 89.8  |
| IDL.TG | rs17001002  | 19 | 10948031  | A | 0.094 | 0.016 | 8.44E-09 | 0.0022 | 35.2  |
| IDL.TG | rs17216525  | 19 | 19662220  | T | 0.132 | 0.021 | 4.39E-10 | 0.0021 | 40.7  |
| IDL.TG | rs181066897 | 4  | 73499882  | C | 0.523 | 0.080 | 1.17E-10 | 0.0042 | 68.2  |
| IDL.TG | rs181169081 | 2  | 21312870  | A | 0.227 | 0.032 | 2.17E-12 | 0.0030 | 57.6  |
| IDL.TG | rs181181625 | 15 | 59377940  | T | 0.388 | 0.058 | 3.00E-11 | 0.0027 | 48.4  |
| IDL.TG | rs181275587 | 19 | 20486755  | A | 0.167 | 0.029 | 2.02E-08 | 0.0022 | 39.0  |
| IDL.TG | rs181412360 | 15 | 59158953  | C | 0.255 | 0.038 | 3.52E-11 | 0.0027 | 48.4  |
| IDL.TG | rs1815786   | 11 | 116921390 | C | 0.095 | 0.016 | 1.47E-09 | 0.0021 | 41.5  |
| IDL.TG | rs181807530 | 17 | 4774814   | G | 0.232 | 0.032 | 9.01E-13 | 0.0032 | 55.0  |
| IDL.TG | rs181847072 | 4  | 73134560  | G | 0.692 | 0.082 | 5.83E-17 | 0.0062 | 102.2 |
| IDL.TG | rs183162020 | 4  | 73690263  | G | 0.861 | 0.115 | 1.99E-13 | 0.0086 | 85.0  |
| IDL.TG | rs183305631 | 19 | 19597444  | A | 0.218 | 0.032 | 1.54E-11 | 0.0033 | 59.0  |
| IDL.TG | rs1838504   | 15 | 58666410  | T | 0.099 | 0.010 | 1.20E-20 | 0.0049 | 94.4  |
| IDL.TG | rs184650103 | 4  | 74850649  | T | 0.430 | 0.046 | 6.76E-20 | 0.0051 | 90.4  |
| IDL.TG | rs1848922   | 2  | 21471603  | C | 0.113 | 0.013 | 7.08E-19 | 0.0044 | 84.5  |
| IDL.TG | rs185049786 | 4  | 74644512  | C | 0.358 | 0.053 | 3.00E-11 | 0.0039 | 74.6  |
| IDL.TG | rs1872741   | 15 | 59450895  | T | 0.073 | 0.013 | 3.91E-08 | 0.0017 | 32.2  |
| IDL.TG | rs1883711   | 20 | 39179822  | C | 0.155 | 0.025 | 6.67E-10 | 0.0026 | 49.6  |
| IDL.TG | rs189741280 | 19 | 19624481  | G | 0.199 | 0.030 | 5.27E-11 | 0.0029 | 56.1  |
| IDL.TG | rs190121281 | 19 | 19252779  | A | 0.231 | 0.033 | 3.24E-12 | 0.0036 | 63.8  |
| IDL.TG | rs190217562 | 4  | 75180409  | C | 0.327 | 0.040 | 1.00E-15 | 0.0040 | 72.1  |
| IDL.TG | rs190934192 | 1  | 55334001  | A | 0.246 | 0.040 | 1.37E-09 | 0.0028 | 55.0  |
| IDL.TG | rs191448950 | 1  | 55584844  | A | 0.319 | 0.032 | 4.51E-23 | 0.0053 | 103.5 |
| IDL.TG | rs192570155 | 1  | 55246601  | C | 0.335 | 0.045 | 2.46E-13 | 0.0039 | 70.4  |
| IDL.TG | rs193092110 | 15 | 58730460  | A | 0.206 | 0.036 | 1.26E-08 | 0.0020 | 35.6  |
| IDL.TG | rs247617    | 16 | 56990716  | A | 0.084 | 0.011 | 4.51E-13 | 0.0029 | 56.3  |
| IDL.TG | rs261334    | 15 | 58726744  | C | 0.197 | 0.012 | 1.09E-56 | 0.0138 | 270.1 |
| IDL.TG | rs2642636   | 15 | 58363242  | G | 0.062 | 0.011 | 1.49E-08 | 0.0018 | 34.5  |
| IDL.TG | rs28370984  | 15 | 58629308  | C | 0.215 | 0.032 | 3.09E-11 | 0.0026 | 49.7  |
| IDL.TG | rs28395406  | 15 | 58629349  | G | 0.108 | 0.016 | 2.50E-11 | 0.0026 | 49.6  |
| IDL.TG | rs2954029   | 8  | 126490972 | T | 0.083 | 0.010 | 1.36E-15 | 0.0035 | 67.2  |
| IDL.TG | rs3005923   | 1  | 56801542  | A | 0.250 | 0.036 | 1.13E-11 | 0.0033 | 64.7  |
| IDL.TG | rs4075673   | 2  | 21150787  | C | 0.102 | 0.010 | 5.92E-22 | 0.0050 | 97.5  |
| IDL.TG | rs429358    | 19 | 45411941  | C | 0.122 | 0.014 | 3.02E-18 | 0.0042 | 81.1  |
| IDL.TG | rs4609471   | 1  | 55493584  | A | 0.254 | 0.030 | 3.64E-17 | 0.0050 | 97.2  |
| IDL.TG | rs61999891  | 15 | 58299599  | A | 0.103 | 0.017 | 5.16E-09 | 0.0022 | 42.0  |
| IDL.TG | rs6511720   | 19 | 11202306  | T | 0.176 | 0.017 | 1.76E-23 | 0.0056 | 107.6 |
| IDL.TG | rs6511721   | 19 | 11206575  | A | 0.070 | 0.011 | 5.20E-10 | 0.0025 | 47.4  |
| IDL.TG | rs660240    | 1  | 109817838 | C | 0.079 | 0.012 | 5.70E-10 | 0.0021 | 40.1  |

|         |             |    |           |   |       |       |          |        |       |
|---------|-------------|----|-----------|---|-------|-------|----------|--------|-------|
| IDL.TG  | rs74073060  | 1  | 55638930  | A | 0.323 | 0.037 | 1.80E-17 | 0.0044 | 86.1  |
| IDL.TG  | rs7412      | 19 | 45412079  | T | 0.263 | 0.026 | 2.70E-23 | 0.0073 | 116.9 |
| IDL.TG  | rs7604788   | 2  | 21190024  | T | 0.195 | 0.022 | 4.58E-18 | 0.0044 | 84.8  |
| IDL.TG  | rs77021821  | 4  | 75684215  | T | 0.266 | 0.040 | 7.83E-11 | 0.0025 | 49.2  |
| IDL.TG  | rs79192207  | 2  | 21417897  | C | 0.087 | 0.014 | 7.29E-10 | 0.0021 | 40.5  |
| IDL.TG  | rs79225634  | 5  | 74619639  | T | 0.062 | 0.011 | 1.60E-08 | 0.0018 | 34.0  |
| IDL.TG  | rs79660716  | 15 | 58521171  | G | 0.205 | 0.027 | 1.68E-13 | 0.0035 | 66.9  |
| IDL.TG  | rs8042174   | 15 | 58685970  | C | 0.132 | 0.020 | 2.42E-10 | 0.0024 | 45.4  |
| IDL.TG  | rs8100204   | 19 | 19393714  | A | 0.118 | 0.016 | 1.88E-12 | 0.0032 | 61.1  |
| IDL.TG  | rs9302635   | 16 | 72144174  | C | 0.078 | 0.013 | 1.27E-08 | 0.0017 | 33.7  |
| IDL.TG  | rs964184    | 11 | 116648917 | C | 0.149 | 0.015 | 7.59E-24 | 0.0054 | 104.8 |
| L.LDL.C | rs10424477  | 19 | 10636051  | T | 0.082 | 0.011 | 1.82E-12 | 0.0029 | 63.0  |
| L.LDL.C | rs10449300  | 1  | 109381904 | G | 0.060 | 0.011 | 3.73E-08 | 0.0016 | 34.3  |
| L.LDL.C | rs111740198 | 19 | 44878217  | A | 0.341 | 0.052 | 1.13E-10 | 0.0037 | 54.4  |
| L.LDL.C | rs114664261 | 2  | 21410015  | T | 0.264 | 0.046 | 2.19E-08 | 0.0027 | 52.8  |
| L.LDL.C | rs11587071  | 1  | 55522674  | T | 0.099 | 0.014 | 7.48E-13 | 0.0026 | 56.0  |
| L.LDL.C | rs116054287 | 1  | 56401689  | C | 0.397 | 0.038 | 3.95E-25 | 0.0058 | 126.0 |
| L.LDL.C | rs117261169 | 19 | 45491032  | T | 0.396 | 0.055 | 1.99E-12 | 0.0030 | 58.4  |
| L.LDL.C | rs117569256 | 19 | 45423330  | G | 0.867 | 0.107 | 1.42E-15 | 0.0076 | 102.6 |
| L.LDL.C | rs11878174  | 19 | 45723379  | C | 0.077 | 0.012 | 9.53E-11 | 0.0029 | 55.8  |
| L.LDL.C | rs12043403  | 1  | 55431933  | C | 0.141 | 0.018 | 1.20E-14 | 0.0039 | 76.2  |
| L.LDL.C | rs12086676  | 1  | 55738663  | T | 0.081 | 0.013 | 2.28E-10 | 0.0020 | 44.0  |
| L.LDL.C | rs13014768  | 2  | 21514796  | G | 0.117 | 0.017 | 2.48E-12 | 0.0025 | 54.8  |
| L.LDL.C | rs137992968 | 19 | 11239696  | T | 0.213 | 0.034 | 6.08E-10 | 0.0020 | 42.8  |
| L.LDL.C | rs138270540 | 4  | 75353427  | C | 0.220 | 0.036 | 1.62E-09 | 0.0023 | 45.1  |
| L.LDL.C | rs138287365 | 4  | 74781004  | C | 0.346 | 0.049 | 4.07E-12 | 0.0032 | 61.6  |
| L.LDL.C | rs138525976 | 1  | 55960656  | A | 0.107 | 0.018 | 7.47E-09 | 0.0018 | 38.1  |
| L.LDL.C | rs140339333 | 4  | 75396456  | A | 0.266 | 0.044 | 2.49E-09 | 0.0025 | 48.8  |
| L.LDL.C | rs140411770 | 19 | 45356517  | A | 0.519 | 0.088 | 7.65E-09 | 0.0044 | 69.6  |
| L.LDL.C | rs142130958 | 19 | 11190652  | A | 0.233 | 0.016 | 1.07E-44 | 0.0102 | 222.7 |
| L.LDL.C | rs143413051 | 4  | 75560225  | T | 0.363 | 0.055 | 6.07E-11 | 0.0030 | 53.8  |
| L.LDL.C | rs143736900 | 4  | 72871285  | C | 0.540 | 0.082 | 1.08E-10 | 0.0037 | 60.7  |
| L.LDL.C | rs144064722 | 4  | 73406173  | G | 0.232 | 0.034 | 1.82E-11 | 0.0027 | 51.3  |
| L.LDL.C | rs144591518 | 19 | 10518992  | T | 0.196 | 0.034 | 1.88E-08 | 0.0016 | 35.0  |
| L.LDL.C | rs144721118 | 1  | 54196340  | A | 0.292 | 0.040 | 3.96E-13 | 0.0039 | 75.9  |
| L.LDL.C | rs144900553 | 19 | 10798974  | T | 0.293 | 0.052 | 2.35E-08 | 0.0022 | 47.8  |
| L.LDL.C | rs146568567 | 1  | 54824117  | A | 0.332 | 0.032 | 4.40E-25 | 0.0060 | 116.9 |
| L.LDL.C | rs147319495 | 2  | 20912953  | G | 0.066 | 0.011 | 3.19E-09 | 0.0018 | 38.9  |
| L.LDL.C | rs147825223 | 19 | 45479553  | C | 0.166 | 0.028 | 8.18E-09 | 0.0021 | 36.6  |
| L.LDL.C | rs148359521 | 2  | 21414212  | T | 0.194 | 0.032 | 2.43E-09 | 0.0022 | 41.8  |
| L.LDL.C | rs148382396 | 1  | 54639713  | A | 0.416 | 0.051 | 1.04E-15 | 0.0050 | 79.7  |
| L.LDL.C | rs149048538 | 19 | 45053024  | A | 0.310 | 0.044 | 2.45E-12 | 0.0030 | 57.7  |
| L.LDL.C | rs149844719 | 1  | 54519237  | T | 0.203 | 0.028 | 8.40E-13 | 0.0029 | 62.4  |
| L.LDL.C | rs149944945 | 1  | 56129361  | G | 0.298 | 0.034 | 8.05E-18 | 0.0044 | 85.5  |
| L.LDL.C | rs150785555 | 1  | 56005603  | A | 0.470 | 0.036 | 1.20E-38 | 0.0098 | 190.9 |
| L.LDL.C | rs150966173 | 19 | 45421204  | T | 0.228 | 0.039 | 6.44E-09 | 0.0021 | 40.3  |
| L.LDL.C | rs150985779 | 19 | 45147992  | T | 0.284 | 0.038 | 1.53E-13 | 0.0034 | 66.0  |

|         |             |    |           |   |       |       |          |        |       |
|---------|-------------|----|-----------|---|-------|-------|----------|--------|-------|
| L.LDL.C | rs151330717 | 19 | 45196964  | A | 0.329 | 0.058 | 2.07E-08 | 0.0025 | 48.4  |
| L.LDL.C | rs157594    | 19 | 45425175  | G | 0.138 | 0.012 | 3.63E-31 | 0.0092 | 179.3 |
| L.LDL.C | rs17111503  | 1  | 55503448  | G | 0.077 | 0.013 | 6.09E-09 | 0.0019 | 41.4  |
| L.LDL.C | rs180961170 | 1  | 57012269  | G | 0.380 | 0.052 | 4.36E-13 | 0.0040 | 71.6  |
| L.LDL.C | rs181169081 | 2  | 21312870  | A | 0.192 | 0.032 | 2.83E-09 | 0.0021 | 41.2  |
| L.LDL.C | rs181594442 | 1  | 57006537  | A | 0.380 | 0.052 | 4.36E-13 | 0.0040 | 71.6  |
| L.LDL.C | rs181847072 | 4  | 73134560  | G | 0.537 | 0.082 | 9.04E-11 | 0.0037 | 61.4  |
| L.LDL.C | rs182300850 | 1  | 54389320  | C | 0.401 | 0.060 | 4.12E-11 | 0.0038 | 56.6  |
| L.LDL.C | rs183162020 | 4  | 73690263  | G | 0.722 | 0.115 | 6.81E-10 | 0.0060 | 59.6  |
| L.LDL.C | rs183383492 | 19 | 11232974  | C | 0.352 | 0.063 | 3.52E-08 | 0.0019 | 33.5  |
| L.LDL.C | rs184229638 | 19 | 45671925  | A | 0.688 | 0.115 | 3.24E-09 | 0.0042 | 50.6  |
| L.LDL.C | rs184566992 | 19 | 44887996  | T | 0.371 | 0.052 | 2.06E-12 | 0.0041 | 64.9  |
| L.LDL.C | rs184650103 | 4  | 74850649  | T | 0.381 | 0.046 | 5.88E-16 | 0.0040 | 71.0  |
| L.LDL.C | rs185049786 | 4  | 74644512  | C | 0.323 | 0.053 | 2.07E-09 | 0.0031 | 60.6  |
| L.LDL.C | rs185415345 | 1  | 56625395  | A | 0.171 | 0.027 | 6.61E-10 | 0.0026 | 50.1  |
| L.LDL.C | rs185802315 | 19 | 10777054  | G | 0.235 | 0.036 | 1.30E-10 | 0.0026 | 46.1  |
| L.LDL.C | rs186538116 | 1  | 56840574  | C | 0.441 | 0.045 | 2.06E-22 | 0.0065 | 116.1 |
| L.LDL.C | rs188099946 | 19 | 45189605  | T | 0.276 | 0.045 | 1.65E-09 | 0.0020 | 42.3  |
| L.LDL.C | rs189409600 | 19 | 45341066  | T | 0.746 | 0.103 | 1.00E-12 | 0.0059 | 82.8  |
| L.LDL.C | rs189718275 | 19 | 45063850  | A | 0.323 | 0.044 | 4.55E-13 | 0.0033 | 63.6  |
| L.LDL.C | rs190217562 | 4  | 75180409  | C | 0.293 | 0.040 | 6.82E-13 | 0.0032 | 57.7  |
| L.LDL.C | rs190934192 | 1  | 55334001  | A | 0.399 | 0.040 | 7.10E-23 | 0.0075 | 144.8 |
| L.LDL.C | rs191210370 | 1  | 54236244  | G | 0.236 | 0.038 | 7.05E-10 | 0.0026 | 50.7  |
| L.LDL.C | rs191404723 | 1  | 54636232  | T | 0.415 | 0.051 | 9.32E-16 | 0.0046 | 80.4  |
| L.LDL.C | rs191448950 | 1  | 55584844  | A | 0.498 | 0.032 | 1.03E-54 | 0.0119 | 258.4 |
| L.LDL.C | rs192012905 | 19 | 44463485  | G | 0.362 | 0.053 | 1.19E-11 | 0.0033 | 59.4  |
| L.LDL.C | rs192570155 | 1  | 55246601  | C | 0.511 | 0.045 | 3.38E-29 | 0.0092 | 164.7 |
| L.LDL.C | rs193084249 | 1  | 26987646  | G | 0.180 | 0.031 | 1.48E-08 | 0.0020 | 38.8  |
| L.LDL.C | rs2007708   | 19 | 45410420  | A | 0.852 | 0.104 | 6.39E-16 | 0.0057 | 104.5 |
| L.LDL.C | rs207176    | 1  | 55791846  | T | 0.125 | 0.017 | 4.57E-13 | 0.0027 | 58.7  |
| L.LDL.C | rs2207132   | 20 | 39142516  | A | 0.142 | 0.025 | 1.13E-08 | 0.0023 | 43.8  |
| L.LDL.C | rs261334    | 15 | 58726744  | C | 0.070 | 0.012 | 6.63E-09 | 0.0017 | 37.2  |
| L.LDL.C | rs2722641   | 19 | 44892775  | A | 0.262 | 0.044 | 5.32E-09 | 0.0029 | 52.2  |
| L.LDL.C | rs2954022   | 8  | 126482621 | A | 0.058 | 0.010 | 6.03E-09 | 0.0017 | 36.1  |
| L.LDL.C | rs2965149   | 19 | 45190766  | C | 0.068 | 0.011 | 1.82E-10 | 0.0022 | 47.3  |
| L.LDL.C | rs2967668   | 19 | 45302951  | G | 0.187 | 0.017 | 1.28E-27 | 0.0078 | 151.7 |
| L.LDL.C | rs312030    | 2  | 21462743  | C | 0.101 | 0.018 | 1.72E-08 | 0.0017 | 36.0  |
| L.LDL.C | rs34042070  | 16 | 72101525  | G | 0.069 | 0.012 | 2.68E-08 | 0.0015 | 33.1  |
| L.LDL.C | rs34722314  | 2  | 21271707  | A | 0.138 | 0.014 | 1.22E-21 | 0.0046 | 98.5  |
| L.LDL.C | rs3741298   | 11 | 116657561 | T | 0.069 | 0.012 | 8.86E-09 | 0.0016 | 35.4  |
| L.LDL.C | rs3935470   | 5  | 74352180  | G | 0.058 | 0.011 | 4.76E-08 | 0.0015 | 32.7  |
| L.LDL.C | rs404935    | 19 | 45372794  | A | 0.157 | 0.017 | 2.82E-19 | 0.0044 | 94.4  |
| L.LDL.C | rs429358    | 19 | 45411941  | C | 0.208 | 0.013 | 2.54E-53 | 0.0122 | 266.6 |
| L.LDL.C | rs4426495   | 2  | 21143982  | T | 0.064 | 0.010 | 3.82E-10 | 0.0019 | 41.4  |
| L.LDL.C | rs4609471   | 1  | 55493584  | A | 0.401 | 0.030 | 1.78E-40 | 0.0125 | 243.3 |
| L.LDL.C | rs4803748   | 19 | 45247048  | T | 0.080 | 0.011 | 1.64E-13 | 0.0030 | 64.9  |
| L.LDL.C | rs4804573   | 19 | 11277232  | A | 0.057 | 0.010 | 2.60E-08 | 0.0016 | 35.3  |
| L.LDL.C | rs495828    | 9  | 136154867 | T | 0.072 | 0.012 | 1.61E-09 | 0.0018 | 38.5  |

|         |             |    |           |   |       |       |          |        |       |
|---------|-------------|----|-----------|---|-------|-------|----------|--------|-------|
| L.LDL.C | rs58446550  | 19 | 45328380  | A | 0.070 | 0.011 | 9.41E-11 | 0.0022 | 48.4  |
| L.LDL.C | rs58996925  | 1  | 56267033  | G | 0.062 | 0.011 | 2.38E-08 | 0.0016 | 34.0  |
| L.LDL.C | rs61770425  | 1  | 55085125  | G | 0.083 | 0.012 | 1.26E-11 | 0.0023 | 50.1  |
| L.LDL.C | rs62117161  | 19 | 45233385  | G | 0.217 | 0.020 | 5.38E-27 | 0.0060 | 130.5 |
| L.LDL.C | rs62120794  | 2  | 21100426  | T | 0.185 | 0.024 | 3.51E-14 | 0.0031 | 62.1  |
| L.LDL.C | rs629301    | 1  | 109818306 | T | 0.128 | 0.012 | 4.36E-26 | 0.0056 | 121.6 |
| L.LDL.C | rs6511721   | 19 | 11206575  | A | 0.091 | 0.011 | 1.76E-16 | 0.0041 | 88.9  |
| L.LDL.C | rs6663252   | 1  | 55630151  | C | 0.087 | 0.012 | 2.33E-12 | 0.0025 | 54.2  |
| L.LDL.C | rs6756629   | 2  | 44065090  | A | 0.141 | 0.018 | 2.03E-14 | 0.0029 | 62.2  |
| L.LDL.C | rs6859      | 19 | 45382034  | G | 0.079 | 0.010 | 2.22E-15 | 0.0031 | 67.6  |
| L.LDL.C | rs7255743   | 19 | 46018119  | A | 0.183 | 0.032 | 1.93E-08 | 0.0017 | 36.8  |
| L.LDL.C | rs73048351  | 19 | 45160086  | A | 0.419 | 0.064 | 1.57E-10 | 0.0031 | 59.4  |
| L.LDL.C | rs73066442  | 7  | 21592973  | G | 0.073 | 0.011 | 2.90E-10 | 0.0020 | 43.0  |
| L.LDL.C | rs73556990  | 19 | 44888175  | G | 0.346 | 0.052 | 8.47E-11 | 0.0040 | 56.9  |
| L.LDL.C | rs73564218  | 19 | 45665952  | C | 0.167 | 0.030 | 4.33E-08 | 0.0018 | 32.8  |
| L.LDL.C | rs74073060  | 1  | 55638930  | A | 0.496 | 0.037 | 2.63E-39 | 0.0105 | 204.6 |
| L.LDL.C | rs7412      | 19 | 45412079  | T | 0.573 | 0.025 | #####    | 0.0347 | 657.1 |
| L.LDL.C | rs75647206  | 1  | 56947591  | T | 0.382 | 0.050 | 4.90E-14 | 0.0038 | 74.1  |
| L.LDL.C | rs7604788   | 2  | 21190024  | T | 0.183 | 0.022 | 2.55E-16 | 0.0036 | 77.8  |
| L.LDL.C | rs76488675  | 1  | 56885874  | G | 0.134 | 0.024 | 2.5E-08  | 0.0020 | 38.9  |
| L.LDL.C | rs76670936  | 19 | 45196581  | A | 0.144 | 0.018 | 1.9E-14  | 0.0034 | 73.1  |
| L.LDL.C | rs77021821  | 4  | 75684215  | T | 0.242 | 0.040 | 3.3E-09  | 0.0021 | 40.7  |
| L.LDL.C | rs79225634  | 5  | 74619639  | T | 0.086 | 0.010 | 4.4E-16  | 0.0033 | 72.0  |
| L.LDL.C | rs79668907  | 19 | 11257169  | T | 0.092 | 0.012 | 4E-13    | 0.0031 | 67.8  |
| L.LDL.C | rs79890446  | 19 | 45723446  | T | 0.248 | 0.033 | 1.5E-13  | 0.0038 | 73.4  |
| L.LDL.C | rs8106814   | 19 | 45441608  | C | 0.103 | 0.014 | 1.6E-12  | 0.0037 | 70.9  |
| L.LDL.C | rs8111962   | 19 | 10915324  | T | 0.102 | 0.014 | 4E-13    | 0.0027 | 57.4  |
| L.LDL.C | rs934197    | 2  | 21267461  | A | 0.114 | 0.011 | 1.7E-24  | 0.0053 | 114.8 |
| L.LDL.C | rs9749236   | 19 | 45524553  | C | 0.441 | 0.075 | 8.4E-09  | 0.0024 | 45.2  |
| L.LDL.C | rs984976    | 5  | 74910870  | G | 0.071 | 0.010 | 1.5E-12  | 0.0025 | 53.8  |
| M.HDL.C | rs117040820 | 16 | 57005762  | T | 0.320 | 0.052 | 1.1E-09  | 0.0027 | 52.4  |
| M.HDL.C | rs1800777   | 16 | 57017319  | A | 0.233 | 0.035 | 5.1E-11  | 0.0026 | 50.8  |
| M.HDL.C | rs2126259   | 8  | 9185146   | C | 0.094 | 0.014 | 1.4E-10  | 0.0020 | 43.1  |
| M.HDL.C | rs247617    | 16 | 56990716  | A | 0.165 | 0.011 | 7.6E-52  | 0.0114 | 249.2 |
| M.HDL.C | rs286       | 8  | 19815256  | T | 0.124 | 0.021 | 4.2E-09  | 0.0018 | 39.2  |
| M.HDL.C | rs28888131  | 16 | 56991624  | A | 0.123 | 0.013 | 1.3E-19  | 0.0042 | 91.9  |
| M.HDL.C | rs289743    | 16 | 57017796  | A | 0.060 | 0.010 | 1.1E-08  | 0.0016 | 34.7  |
| M.HDL.C | rs34932218  | 8  | 19855661  | G | 0.064 | 0.011 | 1.2E-08  | 0.0016 | 34.2  |
| M.HDL.C | rs429358    | 19 | 45411941  | C | 0.083 | 0.013 | 7.3E-10  | 0.0020 | 42.3  |
| M.HDL.C | rs4939883   | 18 | 47167214  | C | 0.073 | 0.013 | 2.3E-08  | 0.0015 | 32.4  |
| M.HDL.C | rs590820    | 1  | 230309619 | G | 0.058 | 0.010 | 1.7E-08  | 0.0016 | 35.3  |
| M.HDL.C | rs7499892   | 16 | 57006590  | T | 0.171 | 0.013 | 1.5E-38  | 0.0085 | 184.0 |
| M.HDL.C | rs75835816  | 8  | 19885513  | C | 0.238 | 0.038 | 6.3E-10  | 0.0022 | 41.6  |
| IDL.C   | rs10424477  | 19 | 10636051  | T | 0.083 | 0.012 | 5.1E-12  | 0.0029 | 56.7  |
| IDL.C   | rs10449300  | 1  | 109381904 | G | 0.066 | 0.011 | 6E-09    | 0.0019 | 37.2  |
| IDL.C   | rs111740198 | 19 | 44878217  | A | 0.327 | 0.052 | 6.2E-10  | 0.0034 | 50.1  |
| IDL.C   | rs114664261 | 2  | 21410015  | T | 0.259 | 0.047 | 4.1E-08  | 0.0026 | 50.8  |
| IDL.C   | rs11579068  | 1  | 55780213  | C | 0.106 | 0.014 | 9.1E-14  | 0.0030 | 57.6  |

|       |             |    |          |   |       |       |         |        |       |
|-------|-------------|----|----------|---|-------|-------|---------|--------|-------|
| IDL.C | rs116054287 | 1  | 56401689 | C | 0.400 | 0.038 | 1.1E-24 | 0.0062 | 120.8 |
| IDL.C | rs117261169 | 19 | 45491032 | T | 0.367 | 0.055 | 6.9E-11 | 0.0026 | 50.3  |
| IDL.C | rs11748027  | 5  | 74909972 | T | 0.072 | 0.010 | 6.2E-12 | 0.0026 | 49.6  |
| IDL.C | rs117569256 | 19 | 45423330 | G | 0.780 | 0.107 | 7.2E-13 | 0.0061 | 82.9  |
| IDL.C | rs11878174  | 19 | 45723379 | C | 0.076 | 0.012 | 1.3E-10 | 0.0028 | 55.0  |
| IDL.C | rs12043403  | 1  | 55431933 | C | 0.132 | 0.018 | 4.5E-13 | 0.0035 | 67.1  |
| IDL.C | rs12086676  | 1  | 55738663 | T | 0.084 | 0.013 | 1.8E-10 | 0.0022 | 43.2  |
| IDL.C | rs137992968 | 19 | 11239696 | T | 0.228 | 0.035 | 1.3E-10 | 0.0023 | 44.4  |
| IDL.C | rs138287365 | 4  | 74781004 | C | 0.305 | 0.049 | 1E-09   | 0.0025 | 47.8  |
| IDL.C | rs138525976 | 1  | 55960656 | A | 0.115 | 0.019 | 1.6E-09 | 0.0021 | 40.7  |
| IDL.C | rs142130958 | 19 | 11190652 | A | 0.238 | 0.017 | 4.2E-42 | 0.0103 | 201.3 |
| IDL.C | rs143413051 | 4  | 75560225 | T | 0.313 | 0.055 | 1.7E-08 | 0.0022 | 40.0  |
| IDL.C | rs144545816 | 2  | 21413077 | A | 0.093 | 0.012 | 1.7E-14 | 0.0033 | 63.1  |
| IDL.C | rs144721118 | 1  | 54196340 | A | 0.297 | 0.040 | 1.8E-13 | 0.0040 | 78.2  |
| IDL.C | rs144900553 | 19 | 10798974 | T | 0.346 | 0.053 | 1.6E-10 | 0.0030 | 58.5  |
| IDL.C | rs146568567 | 1  | 54824117 | A | 0.328 | 0.032 | 1.7E-24 | 0.0059 | 114.2 |
| IDL.C | rs148359521 | 2  | 21414212 | T | 0.203 | 0.032 | 4E-10   | 0.0024 | 46.0  |
| IDL.C | rs148382396 | 1  | 54639713 | A | 0.419 | 0.051 | 6.7E-16 | 0.0051 | 80.8  |
| IDL.C | rs149048538 | 19 | 45053024 | A | 0.311 | 0.044 | 2.2E-12 | 0.0030 | 58.0  |
| IDL.C | rs149844719 | 1  | 54519237 | T | 0.207 | 0.028 | 4.6E-13 | 0.0032 | 62.4  |
| IDL.C | rs149944945 | 1  | 56129361 | G | 0.289 | 0.034 | 7.9E-17 | 0.0042 | 80.5  |
| IDL.C | rs150966173 | 19 | 45421204 | T | 0.221 | 0.039 | 1.9E-08 | 0.0020 | 37.9  |
| IDL.C | rs150985779 | 19 | 45147992 | T | 0.271 | 0.038 | 1.8E-12 | 0.0031 | 60.1  |
| IDL.C | rs151193598 | 4  | 73303394 | A | 0.507 | 0.085 | 4.8E-09 | 0.0039 | 55.7  |
| IDL.C | rs1532085   | 15 | 58683366 | G | 0.091 | 0.011 | 2.1E-17 | 0.0040 | 76.5  |
| IDL.C | rs157594    | 19 | 45425175 | G | 0.136 | 0.012 | 3.7E-30 | 0.0089 | 173.3 |
| IDL.C | rs16940213  | 15 | 58695337 | T | 0.080 | 0.013 | 4.7E-09 | 0.0018 | 35.7  |
| IDL.C | rs180961170 | 1  | 57012269 | G | 0.375 | 0.052 | 9.5E-13 | 0.0039 | 69.6  |
| IDL.C | rs181169081 | 2  | 21312870 | A | 0.202 | 0.032 | 4E-10   | 0.0024 | 45.7  |
| IDL.C | rs181594442 | 1  | 57006537 | A | 0.375 | 0.052 | 9.4E-13 | 0.0039 | 69.6  |
| IDL.C | rs182300850 | 1  | 54389320 | C | 0.419 | 0.060 | 5.6E-12 | 0.0041 | 61.7  |
| IDL.C | rs182896710 | 19 | 10962613 | T | 0.182 | 0.032 | 2.5E-08 | 0.0021 | 40.7  |
| IDL.C | rs183162020 | 4  | 73690263 | G | 0.651 | 0.115 | 2.8E-08 | 0.0049 | 48.4  |
| IDL.C | rs183305631 | 19 | 19597444 | A | 0.186 | 0.032 | 1E-08   | 0.0024 | 42.6  |
| IDL.C | rs183383492 | 19 | 11232974 | C | 0.362 | 0.063 | 1.5E-08 | 0.0020 | 35.5  |
| IDL.C | rs184229638 | 19 | 45671925 | A | 0.663 | 0.115 | 1.2E-08 | 0.0038 | 46.9  |
| IDL.C | rs184566992 | 19 | 44887996 | T | 0.353 | 0.052 | 2.4E-11 | 0.0037 | 58.7  |
| IDL.C | rs184650103 | 4  | 74850649 | T | 0.327 | 0.046 | 3.8E-12 | 0.0029 | 52.4  |
| IDL.C | rs185415345 | 1  | 56625395 | A | 0.164 | 0.027 | 3.2E-09 | 0.0024 | 46.2  |
| IDL.C | rs186538116 | 1  | 56840574 | C | 0.439 | 0.045 | 3E-22   | 0.0064 | 115.3 |
| IDL.C | rs188026950 | 1  | 55939497 | A | 0.463 | 0.036 | 9.3E-38 | 0.0096 | 186.5 |
| IDL.C | rs1883711   | 20 | 39179822 | C | 0.149 | 0.025 | 3E-09   | 0.0024 | 45.7  |
| IDL.C | rs189409600 | 19 | 45341066 | T | 0.650 | 0.103 | 5.3E-10 | 0.0045 | 62.8  |
| IDL.C | rs189524519 | 19 | 11002852 | G | 0.263 | 0.041 | 2.7E-10 | 0.0026 | 47.1  |
| IDL.C | rs189718275 | 19 | 45063850 | A | 0.322 | 0.044 | 5.5E-13 | 0.0033 | 63.2  |
| IDL.C | rs190121281 | 19 | 19252779 | A | 0.197 | 0.033 | 2.8E-09 | 0.0026 | 46.4  |
| IDL.C | rs190217562 | 4  | 75180409 | C | 0.254 | 0.040 | 5.1E-10 | 0.0024 | 43.3  |

|       |             |    |           |   |       |       |         |        |       |
|-------|-------------|----|-----------|---|-------|-------|---------|--------|-------|
| IDL.C | rs190425759 | 19 | 10644246  | A | 0.219 | 0.035 | 1.1E-09 | 0.0022 | 41.6  |
| IDL.C | rs190934192 | 1  | 55334001  | A | 0.388 | 0.040 | 1.2E-21 | 0.0070 | 136.7 |
| IDL.C | rs191210370 | 1  | 54236244  | G | 0.250 | 0.038 | 6.5E-11 | 0.0029 | 56.9  |
| IDL.C | rs191404723 | 1  | 54636232  | T | 0.416 | 0.051 | 8.9E-16 | 0.0046 | 80.5  |
| IDL.C | rs191448950 | 1  | 55584844  | A | 0.484 | 0.032 | 2.1E-51 | 0.0123 | 240.3 |
| IDL.C | rs192012905 | 19 | 44463485  | G | 0.347 | 0.053 | 8.1E-11 | 0.0031 | 54.6  |
| IDL.C | rs192570155 | 1  | 55246601  | C | 0.500 | 0.045 | 5.2E-28 | 0.0088 | 158.0 |
| IDL.C | rs2007708   | 19 | 45410420  | A | 0.751 | 0.104 | 1.1E-12 | 0.0044 | 80.9  |
| IDL.C | rs2287029   | 19 | 10916684  | T | 0.109 | 0.015 | 2.2E-13 | 0.0029 | 56.6  |
| IDL.C | rs2479410   | 1  | 55505861  | A | 0.081 | 0.012 | 8.1E-11 | 0.0026 | 50.3  |
| IDL.C | rs261334    | 15 | 58726744  | C | 0.119 | 0.012 | 2E-21   | 0.0050 | 97.0  |
| IDL.C | rs2722641   | 19 | 44892775  | A | 0.253 | 0.044 | 2E-08   | 0.0027 | 48.4  |
| IDL.C | rs2965149   | 19 | 45190766  | C | 0.070 | 0.011 | 4.6E-10 | 0.0023 | 44.3  |
| IDL.C | rs2967668   | 19 | 45302951  | G | 0.172 | 0.017 | 1.4E-23 | 0.0066 | 128.2 |
| IDL.C | rs2980860   | 8  | 126485337 | G | 0.065 | 0.010 | 5.2E-10 | 0.0021 | 40.6  |
| IDL.C | rs312030    | 2  | 21462743  | C | 0.106 | 0.018 | 8.7E-09 | 0.0019 | 36.0  |
| IDL.C | rs35913552  | 2  | 21272896  | A | 0.143 | 0.015 | 3.9E-21 | 0.0049 | 94.6  |
| IDL.C | rs395908    | 19 | 45373565  | A | 0.161 | 0.018 | 2.6E-18 | 0.0044 | 85.7  |
| IDL.C | rs429358    | 19 | 45411941  | C | 0.183 | 0.014 | 5.9E-39 | 0.0094 | 182.2 |
| IDL.C | rs4609471   | 1  | 55493584  | A | 0.394 | 0.030 | 4.5E-39 | 0.0120 | 234.6 |
| IDL.C | rs4803748   | 19 | 45247048  | T | 0.071 | 0.011 | 2.4E-10 | 0.0024 | 45.7  |
| IDL.C | rs4804573   | 19 | 11277232  | A | 0.059 | 0.011 | 4.5E-08 | 0.0017 | 33.2  |
| IDL.C | rs565436    | 1  | 55524601  | A | 0.089 | 0.012 | 3.8E-13 | 0.0029 | 56.4  |
| IDL.C | rs58446550  | 19 | 45328380  | A | 0.065 | 0.011 | 2.9E-09 | 0.0020 | 38.0  |
| IDL.C | rs61770425  | 1  | 55085125  | G | 0.086 | 0.013 | 1.3E-11 | 0.0026 | 49.3  |
| IDL.C | rs62117161  | 19 | 45233385  | G | 0.195 | 0.021 | 6.2E-21 | 0.0049 | 95.3  |
| IDL.C | rs62120794  | 2  | 21100426  | T | 0.182 | 0.024 | 1.9E-13 | 0.0032 | 56.9  |
| IDL.C | rs62523994  | 8  | 145026582 | A | 0.060 | 0.011 | 2.3E-08 | 0.0017 | 33.2  |
| IDL.C | rs629301    | 1  | 109818306 | T | 0.127 | 0.012 | 7.5E-24 | 0.0055 | 105.7 |
| IDL.C | rs635634    | 9  | 136155000 | T | 0.083 | 0.013 | 2.1E-10 | 0.0022 | 42.4  |
| IDL.C | rs6511721   | 19 | 11206575  | A | 0.086 | 0.011 | 1.9E-14 | 0.0037 | 71.9  |
| IDL.C | rs6663252   | 1  | 55630151  | C | 0.091 | 0.012 | 5E-13   | 0.0029 | 55.1  |
| IDL.C | rs6732011   | 2  | 21146521  | T | 0.074 | 0.011 | 3.6E-12 | 0.0026 | 50.3  |
| IDL.C | rs6756629   | 2  | 44065090  | A | 0.129 | 0.019 | 1.7E-11 | 0.0025 | 47.8  |
| IDL.C | rs6859      | 19 | 45382034  | G | 0.071 | 0.010 | 1.1E-11 | 0.0025 | 49.1  |
| IDL.C | rs7255743   | 19 | 46018119  | A | 0.181 | 0.033 | 4.6E-08 | 0.0018 | 34.2  |
| IDL.C | rs72740818  | 15 | 58654303  | C | 0.058 | 0.010 | 4.4E-08 | 0.0017 | 32.0  |
| IDL.C | rs73048351  | 19 | 45160086  | A | 0.377 | 0.064 | 8.5E-09 | 0.0025 | 48.1  |
| IDL.C | rs73556990  | 19 | 44888175  | G | 0.329 | 0.052 | 6.4E-10 | 0.0036 | 51.6  |
| IDL.C | rs74073060  | 1  | 55638930  | A | 0.487 | 0.037 | 6.7E-38 | 0.0101 | 197.0 |
| IDL.C | rs7412      | 19 | 45412079  | T | 0.533 | 0.026 | 5.1E-92 | 0.0298 | 490.8 |
| IDL.C | rs75647206  | 1  | 56947591  | T | 0.379 | 0.050 | 7.9E-14 | 0.0038 | 72.9  |
| IDL.C | rs7604788   | 2  | 21190024  | T | 0.189 | 0.022 | 3.8E-17 | 0.0041 | 80.1  |
| IDL.C | rs76488675  | 1  | 56885874  | G | 0.147 | 0.024 | 1.1E-09 | 0.0024 | 46.6  |
| IDL.C | rs76670936  | 19 | 45196581  | A | 0.142 | 0.019 | 2.1E-13 | 0.0033 | 63.0  |
| IDL.C | rs7786322   | 7  | 21592766  | T | 0.070 | 0.012 | 9E-09   | 0.0018 | 35.1  |
| IDL.C | rs78620068  | 2  | 21524000  | A | 0.131 | 0.019 | 4.7E-12 | 0.0027 | 52.3  |



|            |             |    |           |   |       |       |         |        |       |
|------------|-------------|----|-----------|---|-------|-------|---------|--------|-------|
| IDL.C      | rs79225634  | 5  | 74619639  | T | 0.090 | 0.011 | 2.5E-16 | 0.0037 | 71.5  |
| IDL.C      | rs79668907  | 19 | 11257169  | T | 0.084 | 0.013 | 1.1E-10 | 0.0026 | 50.6  |
| IDL.C      | rs79890446  | 19 | 45723446  | T | 0.238 | 0.033 | 1.3E-12 | 0.0035 | 67.8  |
| IDL.C      | rs8106814   | 19 | 45441608  | C | 0.095 | 0.014 | 9.4E-11 | 0.0031 | 59.6  |
| IDL.C      | rs952275    | 2  | 21221399  | G | 0.109 | 0.010 | 3.6E-25 | 0.0058 | 112.4 |
| XS.VLDL.TG | rs11076176  | 16 | 57007446  | G | 0.090 | 0.014 | 8.7E-10 | 0.0022 | 42.0  |
| XS.VLDL.TG | rs11096689  | 2  | 21140540  | T | 0.097 | 0.012 | 1.6E-16 | 0.0037 | 71.6  |
| XS.VLDL.TG | rs113531395 | 17 | 4886829   | T | 0.215 | 0.036 | 5.3E-09 | 0.0024 | 45.6  |
| XS.VLDL.TG | rs115849089 | 8  | 19912370  | A | 0.156 | 0.017 | 3.4E-19 | 0.0044 | 86.0  |
| XS.VLDL.TG | rs116802199 | 17 | 4801101   | C | 0.197 | 0.032 | 1.1E-09 | 0.0022 | 40.7  |
| XS.VLDL.TG | rs1168041   | 1  | 62960250  | C | 0.094 | 0.012 | 4E-15   | 0.0035 | 67.2  |
| XS.VLDL.TG | rs1260326   | 2  | 27730940  | C | 0.081 | 0.011 | 6.6E-14 | 0.0030 | 58.8  |
| XS.VLDL.TG | rs1268353   | 11 | 116639692 | T | 0.081 | 0.011 | 2.5E-14 | 0.0031 | 60.7  |
| XS.VLDL.TG | rs12747477  | 1  | 55448248  | A | 0.219 | 0.033 | 9.9E-11 | 0.0027 | 52.5  |
| XS.VLDL.TG | rs138287365 | 4  | 74781004  | C | 0.313 | 0.049 | 3.9E-10 | 0.0026 | 50.3  |
| XS.VLDL.TG | rs143413051 | 4  | 75560225  | T | 0.308 | 0.055 | 2.9E-08 | 0.0022 | 38.8  |
| XS.VLDL.TG | rs143736900 | 4  | 72871285  | C | 0.593 | 0.082 | 1.3E-12 | 0.0044 | 73.5  |
| XS.VLDL.TG | rs146695330 | 19 | 20139610  | A | 0.215 | 0.035 | 1.5E-09 | 0.0027 | 48.0  |
| XS.VLDL.TG | rs150536132 | 19 | 19679560  | T | 0.181 | 0.030 | 1.8E-09 | 0.0028 | 49.2  |
| XS.VLDL.TG | rs150617279 | 19 | 20139234  | A | 0.118 | 0.017 | 1.9E-11 | 0.0027 | 52.7  |
| XS.VLDL.TG | rs150785555 | 1  | 56005603  | A | 0.229 | 0.036 | 3.2E-10 | 0.0023 | 44.8  |
| XS.VLDL.TG | rs151007118 | 11 | 116583864 | T | 0.221 | 0.033 | 8.6E-11 | 0.0025 | 48.6  |
| XS.VLDL.TG | rs151193598 | 4  | 73303394  | A | 0.531 | 0.086 | 9.5E-10 | 0.0043 | 61.2  |
| XS.VLDL.TG | rs157594    | 19 | 45425175  | G | 0.111 | 0.012 | 1.1E-20 | 0.0060 | 116.0 |
| XS.VLDL.TG | rs17216525  | 19 | 19662220  | T | 0.143 | 0.021 | 1.4E-11 | 0.0025 | 47.9  |
| XS.VLDL.TG | rs174418    | 15 | 58687603  | C | 0.088 | 0.010 | 1.5E-16 | 0.0038 | 73.1  |
| XS.VLDL.TG | rs181169081 | 2  | 21312870  | A | 0.213 | 0.032 | 5.1E-11 | 0.0026 | 50.5  |
| XS.VLDL.TG | rs181847072 | 4  | 73134560  | G | 0.595 | 0.082 | 6.8E-13 | 0.0045 | 75.4  |
| XS.VLDL.TG | rs183162020 | 4  | 73690263  | G | 0.711 | 0.116 | 1.5E-09 | 0.0059 | 57.8  |
| XS.VLDL.TG | rs183305631 | 19 | 19597444  | A | 0.212 | 0.032 | 6.1E-11 | 0.0031 | 55.7  |
| XS.VLDL.TG | rs1838504   | 15 | 58666410  | T | 0.069 | 0.010 | 7E-11   | 0.0024 | 46.3  |
| XS.VLDL.TG | rs184650103 | 4  | 74850649  | T | 0.340 | 0.046 | 5.7E-13 | 0.0032 | 56.5  |
| XS.VLDL.TG | rs1848922   | 2  | 21471603  | C | 0.093 | 0.013 | 4E-13   | 0.0029 | 56.6  |
| XS.VLDL.TG | rs1883711   | 20 | 39179822  | C | 0.149 | 0.025 | 3.3E-09 | 0.0024 | 45.6  |
| XS.VLDL.TG | rs188651594 | 11 | 116673091 | A | 0.267 | 0.042 | 5.5E-10 | 0.0025 | 45.2  |
| XS.VLDL.TG | rs189741280 | 19 | 19624481  | G | 0.188 | 0.030 | 5.5E-10 | 0.0026 | 50.2  |
| XS.VLDL.TG | rs190121281 | 19 | 19252779  | A | 0.210 | 0.033 | 2.3E-10 | 0.0030 | 53.0  |
| XS.VLDL.TG | rs190217562 | 4  | 75180409  | C | 0.251 | 0.040 | 7.5E-10 | 0.0024 | 42.5  |
| XS.VLDL.TG | rs191164477 | 2  | 21267593  | T | 0.212 | 0.032 | 3.8E-11 | 0.0026 | 51.0  |
| XS.VLDL.TG | rs193260502 | 11 | 116611138 | A | 0.216 | 0.038 | 2.6E-08 | 0.0023 | 44.1  |
| XS.VLDL.TG | rs247617    | 16 | 56990716  | A | 0.116 | 0.011 | 2.2E-23 | 0.0055 | 106.9 |
| XS.VLDL.TG | rs261334    | 15 | 58726744  | C | 0.118 | 0.012 | 2.9E-21 | 0.0050 | 96.3  |
| XS.VLDL.TG | rs2878419   | 5  | 74640490  | T | 0.061 | 0.010 | 9E-09   | 0.0018 | 35.0  |
| XS.VLDL.TG | rs2954029   | 8  | 126490972 | T | 0.086 | 0.010 | 2.8E-16 | 0.0037 | 70.6  |
| XS.VLDL.TG | rs34041051  | 19 | 45442349  | C | 0.067 | 0.011 | 8.9E-09 | 0.0021 | 39.7  |
| XS.VLDL.TG | rs34346326  | 7  | 73016181  | C | 0.076 | 0.014 | 3.6E-08 | 0.0017 | 31.9  |
| XS.VLDL.TG | rs429358    | 19 | 45411941  | C | 0.108 | 0.014 | 1.7E-14 | 0.0033 | 63.1  |
| XS.VLDL.TG | rs4609471   | 1  | 55493584  | A | 0.173 | 0.030 | 1E-08   | 0.0023 | 45.0  |

|            |             |    |           |   |       |       |         |        |       |
|------------|-------------|----|-----------|---|-------|-------|---------|--------|-------|
| XS.VLDL.TG | rs58542926  | 19 | 19379549  | T | 0.153 | 0.021 | 7.9E-13 | 0.0028 | 53.6  |
| XS.VLDL.TG | rs62123892  | 2  | 21084445  | T | 0.090 | 0.016 | 2.2E-08 | 0.0018 | 33.9  |
| XS.VLDL.TG | rs6511720   | 19 | 11202306  | T | 0.145 | 0.017 | 1.9E-16 | 0.0038 | 73.1  |
| XS.VLDL.TG | rs6511721   | 19 | 11206575  | A | 0.064 | 0.011 | 1.4E-08 | 0.0020 | 39.5  |
| XS.VLDL.TG | rs6544366   | 2  | 21204025  | T | 0.121 | 0.011 | 2.9E-25 | 0.0058 | 112.3 |
| XS.VLDL.TG | rs7115242   | 11 | 116908283 | G | 0.125 | 0.016 | 5E-15   | 0.0034 | 66.7  |
| XS.VLDL.TG | rs72660594  | 1  | 55636240  | C | 0.201 | 0.029 | 7.2E-12 | 0.0027 | 52.9  |
| XS.VLDL.TG | rs74073060  | 1  | 55638930  | A | 0.229 | 0.037 | 1.8E-09 | 0.0022 | 43.2  |
| XS.VLDL.TG | rs77182215  | 11 | 116942366 | A | 0.165 | 0.029 | 1.6E-08 | 0.0019 | 37.6  |
| XS.VLDL.TG | rs79202680  | 17 | 4692640   | T | 0.217 | 0.035 | 7.9E-10 | 0.0023 | 44.9  |
| XS.VLDL.TG | rs964184    | 11 | 116648917 | C | 0.216 | 0.015 | 9.4E-49 | 0.0114 | 222.7 |
| S.VLDL.TG  | rs10401845  | 19 | 11191536  | C | 0.078 | 0.013 | 5.2E-09 | 0.0018 | 38.2  |
| S.VLDL.TG  | rs1042034   | 2  | 21225281  | T | 0.105 | 0.011 | 1.3E-20 | 0.0042 | 91.0  |
| S.VLDL.TG  | rs111648015 | 8  | 19724434  | T | 0.168 | 0.030 | 3.3E-08 | 0.0018 | 38.3  |
| S.VLDL.TG  | rs112030397 | 19 | 8582383   | G | 0.082 | 0.014 | 8.4E-09 | 0.0017 | 35.8  |
| S.VLDL.TG  | rs113560866 | 11 | 117015189 | C | 0.082 | 0.014 | 1.3E-08 | 0.0017 | 37.5  |
| S.VLDL.TG  | rs115849089 | 8  | 19912370  | A | 0.176 | 0.017 | 1.6E-25 | 0.0059 | 129.0 |
| S.VLDL.TG  | rs1168041   | 1  | 62960250  | C | 0.086 | 0.011 | 3.8E-14 | 0.0030 | 64.1  |
| S.VLDL.TG  | rs116843064 | 19 | 8429323   | A | 0.211 | 0.035 | 2.5E-09 | 0.0025 | 48.9  |
| S.VLDL.TG  | rs117001569 | 8  | 19574920  | G | 0.232 | 0.041 | 2.6E-08 | 0.0017 | 33.7  |
| S.VLDL.TG  | rs1240659   | 11 | 116493950 | G | 0.071 | 0.013 | 4.5E-08 | 0.0016 | 34.2  |
| S.VLDL.TG  | rs1260326   | 2  | 27730940  | C | 0.099 | 0.010 | 6.2E-22 | 0.0046 | 98.8  |
| S.VLDL.TG  | rs1268353   | 11 | 116639692 | T | 0.085 | 0.010 | 5.1E-17 | 0.0034 | 74.0  |
| S.VLDL.TG  | rs12997242  | 2  | 21381177  | A | 0.062 | 0.010 | 2.7E-09 | 0.0017 | 37.7  |
| S.VLDL.TG  | rs145106713 | 8  | 19942183  | T | 0.257 | 0.042 | 2.3E-09 | 0.0020 | 38.8  |
| S.VLDL.TG  | rs150617279 | 19 | 20139234  | A | 0.106 | 0.017 | 1.3E-09 | 0.0022 | 42.8  |
| S.VLDL.TG  | rs151007118 | 11 | 116583864 | T | 0.268 | 0.033 | 2.5E-15 | 0.0037 | 71.6  |
| S.VLDL.TG  | rs17216525  | 19 | 19662220  | T | 0.137 | 0.020 | 1E-11   | 0.0023 | 49.5  |
| S.VLDL.TG  | rs188651594 | 11 | 116673091 | A | 0.312 | 0.042 | 3.1E-13 | 0.0035 | 61.8  |
| S.VLDL.TG  | rs2980853   | 8  | 126478350 | C | 0.072 | 0.010 | 4.1E-13 | 0.0026 | 56.3  |
| S.VLDL.TG  | rs34346326  | 7  | 73016181  | C | 0.113 | 0.014 | 1.1E-14 | 0.0031 | 67.0  |
| S.VLDL.TG  | rs36229786  | 16 | 56993901  | C | 0.086 | 0.014 | 1.3E-09 | 0.0020 | 43.0  |
| S.VLDL.TG  | rs3826688   | 19 | 45418961  | C | 0.090 | 0.011 | 1.4E-15 | 0.0035 | 76.5  |
| S.VLDL.TG  | rs429358    | 19 | 45411941  | C | 0.106 | 0.013 | 5.8E-15 | 0.0032 | 68.6  |
| S.VLDL.TG  | rs4341893   | 2  | 21135577  | G | 0.066 | 0.010 | 4.7E-10 | 0.0019 | 41.1  |
| S.VLDL.TG  | rs5167      | 19 | 45448465  | G | 0.058 | 0.010 | 3.8E-08 | 0.0016 | 31.8  |
| S.VLDL.TG  | rs579674    | 11 | 116528224 | G | 0.081 | 0.013 | 2.8E-10 | 0.0020 | 43.7  |
| S.VLDL.TG  | rs6065904   | 20 | 44534651  | A | 0.076 | 0.012 | 1.6E-10 | 0.0020 | 43.8  |
| S.VLDL.TG  | rs61905067  | 11 | 116578982 | G | 0.235 | 0.039 | 2E-09   | 0.0021 | 45.5  |
| S.VLDL.TG  | rs7115242   | 11 | 116908283 | G | 0.127 | 0.016 | 8.8E-16 | 0.0033 | 71.9  |
| S.VLDL.TG  | rs72836561  | 17 | 41926126  | T | 0.215 | 0.036 | 3.1E-09 | 0.0023 | 43.5  |
| S.VLDL.TG  | rs72999033  | 19 | 19366632  | T | 0.155 | 0.021 | 3.4E-13 | 0.0027 | 57.8  |
| S.VLDL.TG  | rs77182215  | 11 | 116942366 | A | 0.205 | 0.029 | 1.6E-12 | 0.0030 | 58.3  |
| S.VLDL.TG  | rs7826306   | 8  | 19900671  | C | 0.064 | 0.010 | 1.4E-09 | 0.0018 | 39.1  |
| S.VLDL.TG  | rs821840    | 16 | 56993886  | G | 0.109 | 0.012 | 3.1E-20 | 0.0046 | 99.1  |
| S.VLDL.TG  | rs9472125   | 6  | 43756169  | T | 0.095 | 0.016 | 5.6E-09 | 0.0025 | 48.6  |
| S.VLDL.TG  | rs964184    | 11 | 116648917 | C | 0.242 | 0.014 | 7.6E-66 | 0.0140 | 305.7 |
| S.VLDL.C   | rs1042034   | 2  | 21225281  | T | 0.107 | 0.011 | 2.1E-21 | 0.0044 | 94.6  |

|          |             |    |           |   |       |       |         |        |       |
|----------|-------------|----|-----------|---|-------|-------|---------|--------|-------|
| S.VLDL.C | rs115849089 | 8  | 19912370  | A | 0.125 | 0.017 | 1.6E-13 | 0.0030 | 64.4  |
| S.VLDL.C | rs11591147  | 1  | 55505647  | T | 0.338 | 0.035 | 1E-21   | 0.0068 | 109.3 |
| S.VLDL.C | rs116054287 | 1  | 56401689  | C | 0.242 | 0.038 | 2.7E-10 | 0.0022 | 46.6  |
| S.VLDL.C | rs1168041   | 1  | 62960250  | C | 0.076 | 0.011 | 1.9E-11 | 0.0023 | 50.4  |
| S.VLDL.C | rs118146573 | 16 | 57000938  | A | 0.120 | 0.017 | 2.5E-12 | 0.0025 | 53.9  |
| S.VLDL.C | rs11881315  | 19 | 10909953  | T | 0.074 | 0.013 | 1.2E-08 | 0.0016 | 35.1  |
| S.VLDL.C | rs1260326   | 2  | 27730940  | C | 0.074 | 0.010 | 7.6E-13 | 0.0025 | 54.5  |
| S.VLDL.C | rs1268353   | 11 | 116639692 | T | 0.066 | 0.010 | 5.4E-11 | 0.0021 | 45.2  |
| S.VLDL.C | rs1367117   | 2  | 21263900  | A | 0.098 | 0.011 | 1E-18   | 0.0040 | 85.5  |
| S.VLDL.C | rs138287365 | 4  | 74781004  | C | 0.301 | 0.049 | 1.5E-09 | 0.0024 | 46.5  |
| S.VLDL.C | rs140339333 | 4  | 75396456  | A | 0.259 | 0.044 | 5.8E-09 | 0.0024 | 46.3  |
| S.VLDL.C | rs142130958 | 19 | 11190652  | A | 0.173 | 0.016 | 2.4E-25 | 0.0056 | 122.0 |
| S.VLDL.C | rs143413051 | 4  | 75560225  | T | 0.345 | 0.055 | 4.3E-10 | 0.0027 | 48.6  |
| S.VLDL.C | rs143736900 | 4  | 72871285  | C | 0.520 | 0.082 | 4.3E-10 | 0.0034 | 56.4  |
| S.VLDL.C | rs146568567 | 1  | 54824117  | A | 0.221 | 0.032 | 5.8E-12 | 0.0027 | 51.5  |
| S.VLDL.C | rs150103689 | 1  | 56105434  | G | 0.327 | 0.044 | 1.5E-13 | 0.0036 | 63.7  |
| S.VLDL.C | rs150617279 | 19 | 20139234  | A | 0.107 | 0.017 | 8.5E-10 | 0.0023 | 43.6  |
| S.VLDL.C | rs151007118 | 11 | 116583864 | T | 0.214 | 0.033 | 2.4E-10 | 0.0024 | 45.8  |
| S.VLDL.C | rs151193598 | 4  | 73303394  | A | 0.528 | 0.085 | 9.5E-10 | 0.0043 | 60.4  |
| S.VLDL.C | rs157594    | 19 | 45425175  | G | 0.102 | 0.012 | 1.1E-17 | 0.0050 | 96.9  |
| S.VLDL.C | rs17216525  | 19 | 19662220  | T | 0.131 | 0.020 | 7.3E-11 | 0.0021 | 45.3  |
| S.VLDL.C | rs17414716  | 1  | 55759138  | G | 0.281 | 0.033 | 1.4E-17 | 0.0038 | 82.6  |
| S.VLDL.C | rs181847072 | 4  | 73134560  | G | 0.522 | 0.082 | 2.6E-10 | 0.0035 | 57.9  |
| S.VLDL.C | rs183162020 | 4  | 73690263  | G | 0.682 | 0.115 | 5.2E-09 | 0.0054 | 53.1  |
| S.VLDL.C | rs183305631 | 19 | 19597444  | A | 0.184 | 0.032 | 1.3E-08 | 0.0023 | 41.7  |
| S.VLDL.C | rs184650103 | 4  | 74850649  | T | 0.346 | 0.046 | 1.6E-13 | 0.0033 | 58.6  |
| S.VLDL.C | rs188357577 | 4  | 75417188  | G | 0.335 | 0.051 | 9.4E-11 | 0.0026 | 50.8  |
| S.VLDL.C | rs188651594 | 11 | 116673091 | A | 0.254 | 0.042 | 3.1E-09 | 0.0023 | 40.8  |
| S.VLDL.C | rs190934192 | 1  | 55334001  | A | 0.250 | 0.040 | 6.7E-10 | 0.0029 | 56.5  |
| S.VLDL.C | rs192570155 | 1  | 55246601  | C | 0.325 | 0.045 | 9.3E-13 | 0.0037 | 66.4  |
| S.VLDL.C | rs2980875   | 8  | 126481747 | G | 0.067 | 0.010 | 1.8E-11 | 0.0022 | 47.9  |
| S.VLDL.C | rs3005923   | 1  | 56801542  | A | 0.222 | 0.036 | 1.5E-09 | 0.0026 | 50.9  |
| S.VLDL.C | rs312030    | 2  | 21462743  | C | 0.110 | 0.018 | 5.4E-10 | 0.0020 | 43.4  |
| S.VLDL.C | rs3764261   | 16 | 56993324  | A | 0.103 | 0.011 | 4E-21   | 0.0044 | 95.4  |
| S.VLDL.C | rs429358    | 19 | 45411941  | C | 0.138 | 0.013 | 2.2E-24 | 0.0054 | 116.6 |
| S.VLDL.C | rs4609471   | 1  | 55493584  | A | 0.251 | 0.030 | 8.4E-17 | 0.0049 | 94.3  |
| S.VLDL.C | rs562338    | 2  | 21288321  | G | 0.083 | 0.013 | 9.7E-11 | 0.0021 | 44.8  |
| S.VLDL.C | rs61905067  | 11 | 116578982 | G | 0.222 | 0.039 | 1.5E-08 | 0.0019 | 40.6  |
| S.VLDL.C | rs62123892  | 2  | 21084445  | T | 0.092 | 0.015 | 4.6E-09 | 0.0018 | 37.9  |
| S.VLDL.C | rs646776    | 1  | 109818530 | T | 0.070 | 0.012 | 5.6E-09 | 0.0017 | 36.8  |
| S.VLDL.C | rs6511721   | 19 | 11206575  | A | 0.068 | 0.011 | 5.3E-10 | 0.0023 | 50.2  |
| S.VLDL.C | rs6720307   | 2  | 20921334  | C | 0.061 | 0.010 | 2.9E-09 | 0.0018 | 38.1  |
| S.VLDL.C | rs7115242   | 11 | 116908283 | G | 0.103 | 0.016 | 6.2E-11 | 0.0022 | 47.5  |
| S.VLDL.C | rs72999033  | 19 | 19366632  | T | 0.147 | 0.021 | 4.8E-12 | 0.0024 | 52.1  |
| S.VLDL.C | rs74073060  | 1  | 55638930  | A | 0.308 | 0.037 | 4E-16   | 0.0040 | 78.3  |
| S.VLDL.C | rs7412      | 19 | 45412079  | T | 0.235 | 0.025 | 6.6E-20 | 0.0058 | 107.2 |
| S.VLDL.C | rs77021821  | 4  | 75684215  | T | 0.231 | 0.040 | 1.5E-08 | 0.0019 | 37.0  |
| S.VLDL.C | rs79225634  | 5  | 74619639  | T | 0.078 | 0.010 | 1.7E-13 | 0.0027 | 58.9  |

|           |             |    |           |   |       |       |         |        |       |
|-----------|-------------|----|-----------|---|-------|-------|---------|--------|-------|
| S.VLDL.C  | rs964184    | 11 | 116648917 | C | 0.188 | 0.014 | 2.3E-40 | 0.0084 | 183.7 |
| S.VLDL.C  | rs984976    | 5  | 74910870  | G | 0.071 | 0.010 | 1.4E-12 | 0.0025 | 53.7  |
| M.VLDL.TG | rs1168001   | 1  | 62933758  | A | 0.072 | 0.011 | 2.6E-11 | 0.0022 | 46.5  |
| M.VLDL.TG | rs116843064 | 19 | 8429323   | A | 0.210 | 0.035 | 3.4E-09 | 0.0025 | 47.5  |
| M.VLDL.TG | rs1260326   | 2  | 27730940  | C | 0.095 | 0.010 | 6.8E-20 | 0.0041 | 88.1  |
| M.VLDL.TG | rs1268353   | 11 | 116639692 | T | 0.079 | 0.010 | 1E-14   | 0.0029 | 62.4  |
| M.VLDL.TG | rs149611002 | 8  | 19986935  | T | 0.248 | 0.042 | 6.4E-09 | 0.0022 | 42.0  |
| M.VLDL.TG | rs150617279 | 19 | 20139234  | A | 0.096 | 0.017 | 4.1E-08 | 0.0018 | 34.6  |
| M.VLDL.TG | rs151007118 | 11 | 116583864 | T | 0.246 | 0.034 | 4.7E-13 | 0.0031 | 59.2  |
| M.VLDL.TG | rs17120347  | 11 | 116996539 | A | 0.091 | 0.015 | 7.4E-10 | 0.0019 | 40.5  |
| M.VLDL.TG | rs17216525  | 19 | 19662220  | T | 0.120 | 0.020 | 2.6E-09 | 0.0018 | 37.5  |
| M.VLDL.TG | rs188632579 | 11 | 116611098 | C | 0.256 | 0.046 | 3.7E-08 | 0.0017 | 33.6  |
| M.VLDL.TG | rs188651594 | 11 | 116673091 | A | 0.277 | 0.043 | 1.2E-10 | 0.0027 | 47.6  |
| M.VLDL.TG | rs34121855  | 7  | 73040814  | G | 0.117 | 0.013 | 2E-18   | 0.0039 | 83.4  |
| M.VLDL.TG | rs42121     | 7  | 72842267  | T | 0.107 | 0.018 | 7.7E-09 | 0.0024 | 45.3  |
| M.VLDL.TG | rs439401    | 19 | 45414451  | C | 0.080 | 0.011 | 1.2E-12 | 0.0027 | 57.8  |
| M.VLDL.TG | rs579674    | 11 | 116528224 | G | 0.081 | 0.013 | 3.6E-10 | 0.0020 | 42.7  |
| M.VLDL.TG | rs59007384  | 19 | 45396665  | T | 0.069 | 0.012 | 1.2E-08 | 0.0017 | 36.2  |
| M.VLDL.TG | rs6065904   | 20 | 44534651  | A | 0.077 | 0.012 | 9.1E-11 | 0.0021 | 44.5  |
| M.VLDL.TG | rs61905067  | 11 | 116578982 | G | 0.222 | 0.039 | 1.7E-08 | 0.0019 | 40.0  |
| M.VLDL.TG | rs6586886   | 8  | 19875408  | A | 0.058 | 0.010 | 2.4E-08 | 0.0016 | 33.1  |
| M.VLDL.TG | rs673548    | 2  | 21237544  | A | 0.080 | 0.011 | 2.4E-12 | 0.0024 | 51.1  |
| M.VLDL.TG | rs7115242   | 11 | 116908283 | G | 0.114 | 0.016 | 4.1E-13 | 0.0027 | 57.8  |
| M.VLDL.TG | rs72999033  | 19 | 19366632  | T | 0.138 | 0.021 | 9E-11   | 0.0021 | 45.4  |
| M.VLDL.TG | rs77182215  | 11 | 116942366 | A | 0.205 | 0.029 | 2.4E-12 | 0.0030 | 56.7  |
| M.VLDL.TG | rs77697917  | 17 | 41840849  | T | 0.209 | 0.037 | 2.8E-08 | 0.0020 | 37.7  |
| M.VLDL.TG | rs79236614  | 8  | 19860460  | G | 0.166 | 0.017 | 1.6E-21 | 0.0045 | 96.2  |
| M.VLDL.TG | rs821840    | 16 | 56993886  | G | 0.070 | 0.012 | 3.3E-09 | 0.0019 | 40.4  |
| M.VLDL.TG | rs9472125   | 6  | 43756169  | T | 0.091 | 0.016 | 2.6E-08 | 0.0023 | 43.9  |
| M.VLDL.TG | rs964184    | 11 | 116648917 | C | 0.228 | 0.014 | 2.4E-58 | 0.0124 | 266.9 |
| S.LDL.C   | rs10180633  | 2  | 21144829  | T | 0.065 | 0.010 | 1.6E-10 | 0.0020 | 42.8  |
| S.LDL.C   | rs10402524  | 19 | 45329344  | C | 0.065 | 0.010 | 1.1E-09 | 0.0019 | 41.6  |
| S.LDL.C   | rs10424477  | 19 | 10636051  | T | 0.072 | 0.011 | 5E-10   | 0.0023 | 48.9  |
| S.LDL.C   | rs111740198 | 19 | 44878217  | A | 0.293 | 0.052 | 2.8E-08 | 0.0028 | 40.1  |
| S.LDL.C   | rs112635299 | 14 | 94838142  | T | 0.249 | 0.040 | 6.6E-10 | 0.0021 | 43.1  |
| S.LDL.C   | rs116054287 | 1  | 56401689  | C | 0.364 | 0.038 | 1.9E-21 | 0.0049 | 105.8 |
| S.LDL.C   | rs117261169 | 19 | 45491032  | T | 0.320 | 0.055 | 1.2E-08 | 0.0020 | 38.2  |
| S.LDL.C   | rs117569256 | 19 | 45423330  | G | 0.734 | 0.107 | 1.3E-11 | 0.0054 | 73.3  |
| S.LDL.C   | rs11878174  | 19 | 45723379  | C | 0.070 | 0.012 | 3.2E-09 | 0.0024 | 46.4  |
| S.LDL.C   | rs12043403  | 1  | 55431933  | C | 0.131 | 0.018 | 5.5E-13 | 0.0034 | 66.3  |
| S.LDL.C   | rs12086676  | 1  | 55738663  | T | 0.071 | 0.013 | 3E-08   | 0.0015 | 33.4  |
| S.LDL.C   | rs1260326   | 2  | 27730940  | C | 0.061 | 0.010 | 4.3E-09 | 0.0017 | 36.7  |
| S.LDL.C   | rs137992968 | 19 | 11239696  | T | 0.195 | 0.034 | 1.3E-08 | 0.0017 | 36.0  |
| S.LDL.C   | rs138270540 | 4  | 75353427  | C | 0.219 | 0.036 | 1.8E-09 | 0.0023 | 44.6  |
| S.LDL.C   | rs138287365 | 4  | 74781004  | C | 0.357 | 0.049 | 7.9E-13 | 0.0034 | 65.4  |
| S.LDL.C   | rs140339333 | 4  | 75396456  | A | 0.260 | 0.044 | 5.4E-09 | 0.0024 | 46.5  |
| S.LDL.C   | rs140411770 | 19 | 45356517  | A | 0.527 | 0.088 | 4E-09   | 0.0046 | 72.0  |
| S.LDL.C   | rs142130958 | 19 | 11190652  | A | 0.207 | 0.016 | 7.8E-36 | 0.0081 | 175.8 |

|         |             |    |           |   |       |       |         |        |       |
|---------|-------------|----|-----------|---|-------|-------|---------|--------|-------|
| S.LDL.C | rs143413051 | 4  | 75560225  | T | 0.364 | 0.055 | 4.7E-11 | 0.0030 | 54.1  |
| S.LDL.C | rs143736900 | 4  | 72871285  | C | 0.584 | 0.082 | 2.5E-12 | 0.0043 | 71.1  |
| S.LDL.C | rs144064722 | 4  | 73406173  | G | 0.252 | 0.034 | 2.5E-13 | 0.0031 | 60.6  |
| S.LDL.C | rs144721118 | 1  | 54196340  | A | 0.249 | 0.040 | 5.4E-10 | 0.0029 | 55.2  |
| S.LDL.C | rs146568567 | 1  | 54824117  | A | 0.288 | 0.032 | 2.6E-19 | 0.0045 | 87.8  |
| S.LDL.C | rs146982841 | 19 | 10771544  | T | 0.223 | 0.036 | 9.4E-10 | 0.0023 | 41.6  |
| S.LDL.C | rs147825223 | 19 | 45479553  | C | 0.165 | 0.028 | 1E-08   | 0.0020 | 36.0  |
| S.LDL.C | rs148359521 | 2  | 21414212  | T | 0.180 | 0.032 | 2.9E-08 | 0.0019 | 36.0  |
| S.LDL.C | rs148382396 | 1  | 54639713  | A | 0.364 | 0.051 | 1.9E-12 | 0.0038 | 61.1  |
| S.LDL.C | rs149048538 | 19 | 45053024  | A | 0.242 | 0.044 | 4.5E-08 | 0.0018 | 35.0  |
| S.LDL.C | rs149844719 | 1  | 54519237  | T | 0.172 | 0.028 | 1.2E-09 | 0.0021 | 44.9  |
| S.LDL.C | rs149944945 | 1  | 56129361  | G | 0.286 | 0.034 | 1.3E-16 | 0.0041 | 78.7  |
| S.LDL.C | rs150785555 | 1  | 56005603  | A | 0.435 | 0.036 | 1.9E-33 | 0.0084 | 163.3 |
| S.LDL.C | rs150966173 | 19 | 45421204  | T | 0.222 | 0.039 | 1.5E-08 | 0.0020 | 38.2  |
| S.LDL.C | rs150985779 | 19 | 45147992  | T | 0.245 | 0.038 | 1.9E-10 | 0.0025 | 48.8  |
| S.LDL.C | rs157594    | 19 | 45425175  | G | 0.130 | 0.012 | 6.3E-28 | 0.0082 | 158.9 |
| S.LDL.C | rs17111503  | 1  | 55503448  | G | 0.072 | 0.013 | 4.3E-08 | 0.0017 | 36.6  |
| S.LDL.C | rs17395160  | 1  | 55085141  | G | 0.081 | 0.012 | 3.5E-11 | 0.0022 | 47.3  |
| S.LDL.C | rs180961170 | 1  | 57012269  | G | 0.349 | 0.052 | 2.9E-11 | 0.0034 | 60.1  |
| S.LDL.C | rs181169081 | 2  | 21312870  | A | 0.178 | 0.032 | 3.5E-08 | 0.0018 | 35.3  |
| S.LDL.C | rs181594442 | 1  | 57006537  | A | 0.348 | 0.052 | 3E-11   | 0.0034 | 60.0  |
| S.LDL.C | rs181847072 | 4  | 73134560  | G | 0.581 | 0.082 | 2.1E-12 | 0.0043 | 71.8  |
| S.LDL.C | rs182300850 | 1  | 54389320  | C | 0.350 | 0.060 | 7.7E-09 | 0.0029 | 43.1  |
| S.LDL.C | rs182318839 | 19 | 45747128  | T | 0.298 | 0.054 | 4E-08   | 0.0027 | 46.8  |
| S.LDL.C | rs183162020 | 4  | 73690263  | G | 0.760 | 0.115 | 7E-11   | 0.0067 | 66.2  |
| S.LDL.C | rs184566992 | 19 | 44887996  | T | 0.318 | 0.052 | 1.5E-09 | 0.0030 | 47.7  |
| S.LDL.C | rs184650103 | 4  | 74850649  | T | 0.396 | 0.046 | 3.5E-17 | 0.0043 | 76.6  |
| S.LDL.C | rs185049786 | 4  | 74644512  | C | 0.336 | 0.053 | 3.9E-10 | 0.0034 | 65.8  |
| S.LDL.C | rs185415345 | 1  | 56625395  | A | 0.159 | 0.027 | 8.5E-09 | 0.0022 | 43.4  |
| S.LDL.C | rs186538116 | 1  | 56840574  | C | 0.405 | 0.045 | 3.2E-19 | 0.0055 | 97.8  |
| S.LDL.C | rs189409600 | 19 | 45341066  | T | 0.713 | 0.103 | 8.8E-12 | 0.0054 | 75.6  |
| S.LDL.C | rs189718275 | 19 | 45063850  | A | 0.256 | 0.044 | 9.3E-09 | 0.0021 | 39.8  |
| S.LDL.C | rs190217562 | 4  | 75180409  | C | 0.300 | 0.040 | 1.7E-13 | 0.0034 | 60.4  |
| S.LDL.C | rs190934192 | 1  | 55334001  | A | 0.359 | 0.040 | 6.8E-19 | 0.0060 | 117.1 |
| S.LDL.C | rs191404723 | 1  | 54636232  | T | 0.365 | 0.051 | 1.5E-12 | 0.0036 | 62.1  |
| S.LDL.C | rs191448950 | 1  | 55584844  | A | 0.469 | 0.032 | 1E-48   | 0.0105 | 228.0 |
| S.LDL.C | rs192012905 | 19 | 44463485  | G | 0.308 | 0.053 | 7.5E-09 | 0.0024 | 42.9  |
| S.LDL.C | rs192570155 | 1  | 55246601  | C | 0.458 | 0.045 | 7.8E-24 | 0.0074 | 132.0 |
| S.LDL.C | rs193084249 | 1  | 26987646  | G | 0.177 | 0.031 | 2.3E-08 | 0.0019 | 37.6  |
| S.LDL.C | rs2007708   | 19 | 45410420  | A | 0.798 | 0.104 | 3.4E-14 | 0.0050 | 91.6  |
| S.LDL.C | rs207176    | 1  | 55791846  | T | 0.114 | 0.017 | 3.8E-11 | 0.0023 | 48.8  |
| S.LDL.C | rs2479408   | 1  | 55504188  | G | 0.082 | 0.014 | 2E-08   | 0.0019 | 41.5  |
| S.LDL.C | rs2927472   | 19 | 45349369  | C | 0.124 | 0.018 | 5.6E-12 | 0.0028 | 59.9  |
| S.LDL.C | rs2954027   | 8  | 126485294 | A | 0.069 | 0.010 | 5.2E-12 | 0.0023 | 50.7  |
| S.LDL.C | rs2965149   | 19 | 45190766  | C | 0.066 | 0.011 | 8.1E-10 | 0.0020 | 43.7  |
| S.LDL.C | rs2967668   | 19 | 45302951  | G | 0.163 | 0.017 | 1.8E-21 | 0.0060 | 115.3 |
| S.LDL.C | rs34042070  | 16 | 72101525  | G | 0.076 | 0.012 | 8.6E-10 | 0.0019 | 40.0  |
| S.LDL.C | rs35913552  | 2  | 21272896  | A | 0.115 | 0.014 | 9.2E-16 | 0.0032 | 70.0  |

|          |             |    |           |   |       |       |         |        |       |
|----------|-------------|----|-----------|---|-------|-------|---------|--------|-------|
| S.LDL.C  | rs429358    | 19 | 45411941  | C | 0.220 | 0.013 | 1.2E-59 | 0.0136 | 297.6 |
| S.LDL.C  | rs4609471   | 1  | 55493584  | A | 0.355 | 0.030 | 3.2E-32 | 0.0098 | 190.5 |
| S.LDL.C  | rs4614977   | 2  | 44087024  | G | 0.130 | 0.018 | 3.2E-12 | 0.0024 | 51.9  |
| S.LDL.C  | rs4703667   | 5  | 74613906  | C | 0.090 | 0.010 | 2.6E-18 | 0.0039 | 84.6  |
| S.LDL.C  | rs4803748   | 19 | 45247048  | T | 0.083 | 0.011 | 2.1E-14 | 0.0032 | 69.4  |
| S.LDL.C  | rs533617    | 2  | 21233972  | C | 0.172 | 0.022 | 4E-15   | 0.0032 | 68.5  |
| S.LDL.C  | rs562556    | 1  | 55524237  | A | 0.082 | 0.013 | 6.7E-10 | 0.0019 | 41.7  |
| S.LDL.C  | rs61457016  | 19 | 41085400  | G | 0.317 | 0.056 | 3.1E-08 | 0.0019 | 39.2  |
| S.LDL.C  | rs62117161  | 19 | 45233385  | G | 0.178 | 0.020 | 9.2E-19 | 0.0041 | 87.7  |
| S.LDL.C  | rs62120794  | 2  | 21100426  | T | 0.165 | 0.024 | 1.5E-11 | 0.0024 | 49.1  |
| S.LDL.C  | rs629301    | 1  | 109818306 | T | 0.123 | 0.012 | 2E-24   | 0.0052 | 112.8 |
| S.LDL.C  | rs6511721   | 19 | 11206575  | A | 0.084 | 0.011 | 2.1E-14 | 0.0035 | 76.1  |
| S.LDL.C  | rs6663252   | 1  | 55630151  | C | 0.078 | 0.012 | 2.2E-10 | 0.0020 | 44.2  |
| S.LDL.C  | rs6859      | 19 | 45382034  | G | 0.070 | 0.010 | 1.6E-12 | 0.0025 | 53.3  |
| S.LDL.C  | rs73048351  | 19 | 45160086  | A | 0.390 | 0.064 | 2.4E-09 | 0.0027 | 51.5  |
| S.LDL.C  | rs73556990  | 19 | 44888175  | G | 0.295 | 0.052 | 2.8E-08 | 0.0029 | 41.4  |
| S.LDL.C  | rs74073060  | 1  | 55638930  | A | 0.455 | 0.037 | 2E-33   | 0.0088 | 171.7 |
| S.LDL.C  | rs7412      | 19 | 45412079  | T | 0.492 | 0.025 | 5.5E-83 | 0.0256 | 480.1 |
| S.LDL.C  | rs75647206  | 1  | 56947591  | T | 0.349 | 0.050 | 5.2E-12 | 0.0032 | 61.8  |
| S.LDL.C  | rs76670936  | 19 | 45196581  | A | 0.129 | 0.018 | 5.7E-12 | 0.0027 | 58.9  |
| S.LDL.C  | rs77021821  | 4  | 75684215  | T | 0.243 | 0.040 | 2.7E-09 | 0.0021 | 40.9  |
| S.LDL.C  | rs78620068  | 2  | 21524000  | A | 0.116 | 0.017 | 4.2E-11 | 0.0023 | 48.6  |
| S.LDL.C  | rs79668907  | 19 | 11257169  | T | 0.076 | 0.012 | 1.9E-09 | 0.0021 | 46.3  |
| S.LDL.C  | rs79890446  | 19 | 45723446  | T | 0.219 | 0.033 | 6.2E-11 | 0.0030 | 57.3  |
| S.LDL.C  | rs8106814   | 19 | 45441608  | C | 0.097 | 0.014 | 2.6E-11 | 0.0032 | 62.8  |
| S.LDL.C  | rs8111962   | 19 | 10915324  | T | 0.087 | 0.014 | 5.7E-10 | 0.0019 | 41.7  |
| S.LDL.C  | rs934197    | 2  | 21267461  | A | 0.103 | 0.011 | 2.2E-20 | 0.0043 | 93.6  |
| S.LDL.C  | rs964184    | 11 | 116648917 | C | 0.106 | 0.014 | 6.7E-14 | 0.0027 | 58.4  |
| S.LDL.C  | rs984976    | 5  | 74910870  | G | 0.078 | 0.010 | 1E-14   | 0.0030 | 63.9  |
| S.HDL.TG | rs11076174  | 16 | 57003146  | C | 0.096 | 0.016 | 2.7E-09 | 0.0018 | 39.8  |
| S.HDL.TG | rs11076176  | 16 | 57007446  | G | 0.133 | 0.014 | 1.9E-21 | 0.0049 | 106.7 |
| S.HDL.TG | rs117241420 | 8  | 19770344  | A | 0.247 | 0.041 | 2.3E-09 | 0.0020 | 37.9  |
| S.HDL.TG | rs1260326   | 2  | 27730940  | C | 0.069 | 0.010 | 3.6E-11 | 0.0022 | 46.8  |
| S.HDL.TG | rs1268353   | 11 | 116639692 | T | 0.083 | 0.010 | 2.2E-16 | 0.0033 | 71.1  |
| S.HDL.TG | rs138287365 | 4  | 74781004  | C | 0.288 | 0.049 | 7.2E-09 | 0.0022 | 42.7  |
| S.HDL.TG | rs140339333 | 4  | 75396456  | A | 0.248 | 0.044 | 2.4E-08 | 0.0022 | 42.6  |
| S.HDL.TG | rs151007118 | 11 | 116583864 | T | 0.202 | 0.034 | 2.7E-09 | 0.0021 | 40.5  |
| S.HDL.TG | rs151193598 | 4  | 73303394  | A | 0.511 | 0.086 | 3.6E-09 | 0.0040 | 56.5  |
| S.HDL.TG | rs157594    | 19 | 45425175  | G | 0.079 | 0.012 | 2.7E-11 | 0.0030 | 58.7  |
| S.HDL.TG | rs1800777   | 16 | 57017319  | A | 0.202 | 0.035 | 1.4E-08 | 0.0020 | 38.2  |
| S.HDL.TG | rs1815786   | 11 | 116921390 | C | 0.118 | 0.015 | 3.6E-14 | 0.0031 | 67.4  |
| S.HDL.TG | rs183365738 | 4  | 72954415  | A | 0.524 | 0.082 | 2.1E-10 | 0.0035 | 58.5  |
| S.HDL.TG | rs184650103 | 4  | 74850649  | T | 0.313 | 0.046 | 2.8E-11 | 0.0027 | 47.9  |
| S.HDL.TG | rs1848922   | 2  | 21471603  | C | 0.074 | 0.012 | 1.4E-09 | 0.0019 | 40.5  |
| S.HDL.TG | rs188651594 | 11 | 116673091 | A | 0.236 | 0.042 | 3.7E-08 | 0.0020 | 35.3  |
| S.HDL.TG | rs190217562 | 4  | 75180409  | C | 0.240 | 0.040 | 3.6E-09 | 0.0022 | 38.8  |
| S.HDL.TG | rs2954029   | 8  | 126490972 | T | 0.074 | 0.010 | 8.5E-14 | 0.0028 | 59.9  |
| S.HDL.TG | rs34356624  | 8  | 19903935  | C | 0.222 | 0.039 | 2.3E-08 | 0.0018 | 35.1  |

|          |             |    |           |   |       |       |         |        |       |
|----------|-------------|----|-----------|---|-------|-------|---------|--------|-------|
| S.HDL.TG | rs3764261   | 16 | 56993324  | A | 0.148 | 0.011 | 3.6E-42 | 0.0092 | 199.9 |
| S.HDL.TG | rs429358    | 19 | 45411941  | C | 0.100 | 0.013 | 1.5E-13 | 0.0028 | 61.5  |
| S.HDL.TG | rs4296389   | 2  | 21142994  | T | 0.077 | 0.011 | 5.1E-13 | 0.0026 | 55.4  |
| S.HDL.TG | rs6065904   | 20 | 44534651  | A | 0.090 | 0.012 | 2.8E-14 | 0.0029 | 62.0  |
| S.HDL.TG | rs6511720   | 19 | 11202306  | T | 0.098 | 0.017 | 7.3E-09 | 0.0018 | 37.9  |
| S.HDL.TG | rs6586886   | 8  | 19875408  | A | 0.057 | 0.010 | 3.7E-08 | 0.0015 | 32.7  |
| S.HDL.TG | rs6957745   | 7  | 73056750  | C | 0.090 | 0.013 | 2.4E-11 | 0.0023 | 50.6  |
| S.HDL.TG | rs79236614  | 8  | 19860460  | G | 0.165 | 0.017 | 4.4E-21 | 0.0044 | 95.3  |
| S.HDL.TG | rs9472125   | 6  | 43756169  | T | 0.092 | 0.016 | 1.9E-08 | 0.0023 | 45.2  |
| S.HDL.TG | rs964184    | 11 | 116648917 | C | 0.199 | 0.014 | 1.2E-44 | 0.0094 | 204.8 |
| XL.HDL.C | rs11076174  | 16 | 57003146  | C | 0.093 | 0.016 | 7.1E-09 | 0.0017 | 36.8  |
| XL.HDL.C | rs111543310 | 15 | 59531818  | C | 0.322 | 0.049 | 4.2E-11 | 0.0033 | 63.1  |
| XL.HDL.C | rs112835635 | 15 | 59351989  | G | 0.218 | 0.035 | 7.6E-10 | 0.0022 | 43.6  |
| XL.HDL.C | rs112884731 | 15 | 59504897  | C | 0.527 | 0.057 | 2.3E-20 | 0.0052 | 92.3  |
| XL.HDL.C | rs112925355 | 15 | 59125988  | A | 0.210 | 0.029 | 3.6E-13 | 0.0027 | 57.8  |
| XL.HDL.C | rs113298164 | 15 | 58855748  | T | 0.554 | 0.047 | 2E-31   | 0.0083 | 148.4 |
| XL.HDL.C | rs116142092 | 15 | 59751872  | T | 0.378 | 0.050 | 7.6E-14 | 0.0033 | 59.7  |
| XL.HDL.C | rs12708967  | 16 | 56993211  | C | 0.100 | 0.013 | 1.4E-13 | 0.0028 | 59.7  |
| XL.HDL.C | rs138690293 | 15 | 59310760  | C | 0.638 | 0.107 | 2.9E-09 | 0.0030 | 48.8  |
| XL.HDL.C | rs139066754 | 20 | 44224606  | A | 0.106 | 0.018 | 6E-09   | 0.0018 | 39.9  |
| XL.HDL.C | rs142855631 | 15 | 59286876  | T | 0.652 | 0.108 | 1.7E-09 | 0.0030 | 49.3  |
| XL.HDL.C | rs142887188 | 15 | 60132580  | G | 0.246 | 0.042 | 3.9E-09 | 0.0023 | 39.0  |
| XL.HDL.C | rs146842281 | 15 | 59356659  | T | 0.148 | 0.022 | 1.8E-11 | 0.0025 | 48.5  |
| XL.HDL.C | rs148527372 | 3  | 159734448 | A | 0.554 | 0.095 | 5.7E-09 | 0.0026 | 39.8  |
| XL.HDL.C | rs148902553 | 15 | 59776836  | C | 0.382 | 0.051 | 5E-14   | 0.0035 | 60.2  |
| XL.HDL.C | rs1532624   | 16 | 57005479  | A | 0.127 | 0.010 | 1.1E-37 | 0.0079 | 170.7 |
| XL.HDL.C | rs174547    | 11 | 61570783  | C | 0.085 | 0.010 | 3.9E-17 | 0.0034 | 74.5  |
| XL.HDL.C | rs17821274  | 15 | 58684478  | C | 0.075 | 0.010 | 8.3E-13 | 0.0025 | 54.9  |
| XL.HDL.C | rs17821298  | 15 | 58690738  | A | 0.066 | 0.012 | 2E-08   | 0.0016 | 33.5  |
| XL.HDL.C | rs181412360 | 15 | 59158953  | C | 0.344 | 0.038 | 1.5E-19 | 0.0049 | 88.0  |
| XL.HDL.C | rs182776276 | 15 | 59254589  | G | 0.549 | 0.060 | 5.7E-20 | 0.0051 | 88.4  |
| XL.HDL.C | rs183975744 | 15 | 59052479  | T | 0.671 | 0.120 | 2.4E-08 | 0.0022 | 34.9  |
| XL.HDL.C | rs185241689 | 15 | 59143155  | G | 0.756 | 0.114 | 3.8E-11 | 0.0034 | 55.6  |
| XL.HDL.C | rs185481    | 15 | 58666679  | C | 0.058 | 0.010 | 1.7E-08 | 0.0017 | 35.9  |
| XL.HDL.C | rs189375934 | 15 | 60196526  | G | 0.318 | 0.053 | 1.9E-09 | 0.0023 | 40.2  |
| XL.HDL.C | rs189418461 | 15 | 59725202  | G | 0.375 | 0.050 | 6E-14   | 0.0034 | 59.9  |
| XL.HDL.C | rs192630343 | 15 | 59286102  | A | 0.619 | 0.107 | 7.6E-09 | 0.0029 | 47.4  |
| XL.HDL.C | rs1943973   | 18 | 47179516  | A | 0.087 | 0.013 | 1.3E-10 | 0.0020 | 42.4  |
| XL.HDL.C | rs2070895   | 15 | 58723939  | A | 0.168 | 0.012 | 5.8E-47 | 0.0104 | 226.0 |
| XL.HDL.C | rs2575876   | 9  | 107665739 | A | 0.100 | 0.013 | 2.7E-15 | 0.0030 | 65.2  |
| XL.HDL.C | rs261291    | 15 | 58680178  | C | 0.154 | 0.010 | 3.3E-51 | 0.0110 | 240.3 |
| XL.HDL.C | rs34718390  | 15 | 58682690  | A | 0.153 | 0.024 | 1.1E-10 | 0.0027 | 58.9  |
| XL.HDL.C | rs4810479   | 20 | 44545048  | T | 0.117 | 0.011 | 1.2E-25 | 0.0053 | 115.5 |
| XL.HDL.C | rs60439253  | 15 | 58874532  | T | 0.230 | 0.028 | 4E-16   | 0.0036 | 72.5  |
| XL.HDL.C | rs61803025  | 1  | 161600591 | C | 0.104 | 0.019 | 1.9E-08 | 0.0021 | 41.5  |
| XL.HDL.C | rs67053123  | 12 | 125353810 | A | 0.081 | 0.015 | 2.7E-08 | 0.0017 | 35.9  |
| XL.HDL.C | rs686030    | 9  | 15304782  | A | 0.083 | 0.015 | 1.5E-08 | 0.0015 | 33.1  |
| XL.HDL.C | rs76116860  | 15 | 59834938  | C | 0.265 | 0.041 | 1.2E-10 | 0.0025 | 47.8  |
| XL.HDL.C | rs7873387   | 9  | 107595602 | C | 0.093 | 0.016 | 9.2E-09 | 0.0016 | 34.4  |
| XL.HDL.C | rs79844529  | 15 | 58445279  | T | 0.182 | 0.032 | 1.3E-08 | 0.0022 | 41.6  |

|          |             |    |           |   |       |       |         |        |       |
|----------|-------------|----|-----------|---|-------|-------|---------|--------|-------|
| M.VLDL.C | rs10401845  | 19 | 11191536  | C | 0.088 | 0.013 | 2.4E-11 | 0.0023 | 49.7  |
| M.VLDL.C | rs1042034   | 2  | 21225281  | T | 0.109 | 0.011 | 4.9E-22 | 0.0045 | 97.4  |
| M.VLDL.C | rs113560866 | 11 | 117015189 | C | 0.083 | 0.014 | 5.9E-09 | 0.0018 | 39.1  |
| M.VLDL.C | rs115849089 | 8  | 19912370  | A | 0.164 | 0.017 | 2.7E-22 | 0.0051 | 111.0 |
| M.VLDL.C | rs1168041   | 1  | 62960250  | C | 0.094 | 0.011 | 1.4E-16 | 0.0035 | 76.1  |
| M.VLDL.C | rs117001569 | 8  | 19574920  | G | 0.238 | 0.041 | 1.1E-08 | 0.0018 | 35.3  |
| M.VLDL.C | rs1260326   | 2  | 27730940  | C | 0.094 | 0.010 | 5E-20   | 0.0041 | 89.1  |
| M.VLDL.C | rs1268353   | 11 | 116639692 | T | 0.087 | 0.010 | 8.2E-18 | 0.0036 | 77.4  |
| M.VLDL.C | rs145106713 | 8  | 19942183  | T | 0.252 | 0.042 | 4.2E-09 | 0.0019 | 37.3  |
| M.VLDL.C | rs146695330 | 19 | 20139610  | A | 0.203 | 0.035 | 8.3E-09 | 0.0024 | 43.0  |
| M.VLDL.C | rs150536132 | 19 | 19679560  | T | 0.192 | 0.030 | 1.4E-10 | 0.0031 | 55.3  |
| M.VLDL.C | rs150617279 | 19 | 20139234  | A | 0.128 | 0.017 | 1.8E-13 | 0.0032 | 62.6  |
| M.VLDL.C | rs151007118 | 11 | 116583864 | T | 0.263 | 0.033 | 7.1E-15 | 0.0036 | 68.9  |
| M.VLDL.C | rs17145738  | 7  | 72982874  | T | 0.110 | 0.015 | 4.3E-13 | 0.0027 | 57.3  |
| M.VLDL.C | rs17216525  | 19 | 19662220  | T | 0.153 | 0.020 | 2.6E-14 | 0.0029 | 61.8  |
| M.VLDL.C | rs183130    | 16 | 56991363  | T | 0.105 | 0.012 | 2.4E-18 | 0.0045 | 83.3  |
| M.VLDL.C | rs183305631 | 19 | 19597444  | A | 0.212 | 0.032 | 4.7E-11 | 0.0031 | 55.6  |
| M.VLDL.C | rs188651594 | 11 | 116673091 | A | 0.317 | 0.042 | 1.1E-13 | 0.0036 | 63.8  |
| M.VLDL.C | rs189741280 | 19 | 19624481  | G | 0.180 | 0.030 | 2.6E-09 | 0.0024 | 45.7  |
| M.VLDL.C | rs190121281 | 19 | 19252779  | A | 0.196 | 0.033 | 2.6E-09 | 0.0026 | 46.0  |
| M.VLDL.C | rs2954021   | 8  | 126482077 | G | 0.069 | 0.010 | 2.8E-12 | 0.0024 | 51.4  |
| M.VLDL.C | rs36229786  | 16 | 56993901  | C | 0.079 | 0.014 | 1.9E-08 | 0.0017 | 36.7  |
| M.VLDL.C | rs3826688   | 19 | 45418961  | C | 0.092 | 0.011 | 2.2E-16 | 0.0037 | 80.4  |
| M.VLDL.C | rs3846661   | 5  | 74639178  | G | 0.066 | 0.010 | 9E-11   | 0.0021 | 45.3  |
| M.VLDL.C | rs429358    | 19 | 45411941  | C | 0.111 | 0.013 | 3.4E-16 | 0.0034 | 74.5  |
| M.VLDL.C | rs579674    | 11 | 116528224 | G | 0.078 | 0.013 | 9.8E-10 | 0.0019 | 40.8  |
| M.VLDL.C | rs61905067  | 11 | 116578982 | G | 0.239 | 0.039 | 1.1E-09 | 0.0022 | 46.9  |
| M.VLDL.C | rs6586891   | 8  | 19914598  | A | 0.065 | 0.010 | 8.1E-10 | 0.0018 | 39.9  |
| M.VLDL.C | rs7115242   | 11 | 116908283 | G | 0.117 | 0.016 | 8.9E-14 | 0.0028 | 61.5  |
| M.VLDL.C | rs71480307  | 11 | 116516873 | A | 0.084 | 0.015 | 2.7E-08 | 0.0016 | 34.8  |
| M.VLDL.C | rs72660594  | 1  | 55636240  | C | 0.175 | 0.029 | 1.8E-09 | 0.0021 | 40.2  |
| M.VLDL.C | rs72836561  | 17 | 41926126  | T | 0.208 | 0.036 | 9.9E-09 | 0.0021 | 40.4  |
| M.VLDL.C | rs72999033  | 19 | 19366632  | T | 0.176 | 0.021 | 1E-16   | 0.0035 | 74.8  |
| M.VLDL.C | rs7533354   | 1  | 63217503  | C | 0.082 | 0.015 | 3E-08   | 0.0016 | 33.5  |
| M.VLDL.C | rs7575840   | 2  | 21273490  | T | 0.074 | 0.011 | 1.9E-11 | 0.0023 | 50.0  |
| M.VLDL.C | rs77182215  | 11 | 116942366 | A | 0.206 | 0.029 | 1.2E-12 | 0.0030 | 58.6  |
| M.VLDL.C | rs964184    | 11 | 116648917 | C | 0.234 | 0.014 | 8.7E-62 | 0.0130 | 284.8 |
| M.VLDL.C | rs984976    | 5  | 74910870  | G | 0.063 | 0.010 | 3.5E-10 | 0.0019 | 41.9  |
| L.VLDL.C | rs10889331  | 1  | 62943007  | T | 0.086 | 0.012 | 3.8E-13 | 0.0032 | 55.9  |
| L.VLDL.C | rs117241420 | 8  | 19770344  | A | 0.232 | 0.041 | 2.2E-08 | 0.0017 | 32.9  |
| L.VLDL.C | rs1260326   | 2  | 27730940  | C | 0.089 | 0.010 | 8.5E-18 | 0.0037 | 78.1  |
| L.VLDL.C | rs1268353   | 11 | 116639692 | T | 0.073 | 0.010 | 8.6E-13 | 0.0025 | 53.3  |
| L.VLDL.C | rs150617279 | 19 | 20139234  | A | 0.109 | 0.017 | 4.7E-10 | 0.0023 | 44.6  |
| L.VLDL.C | rs151007118 | 11 | 116583864 | T | 0.256 | 0.034 | 5E-14   | 0.0034 | 64.2  |
| L.VLDL.C | rs17120347  | 11 | 116996539 | A | 0.091 | 0.015 | 6.2E-10 | 0.0019 | 40.9  |
| L.VLDL.C | rs17216525  | 19 | 19662220  | T | 0.134 | 0.020 | 3.1E-11 | 0.0022 | 46.8  |
| L.VLDL.C | rs181583353 | 11 | 39151067  | G | 0.249 | 0.044 | 2.4E-08 | 0.0024 | 41.5  |
| L.VLDL.C | rs188651594 | 11 | 116673091 | A | 0.289 | 0.043 | 2.1E-11 | 0.0029 | 51.5  |



|            |             |    |           |   |       |       |         |        |       |
|------------|-------------|----|-----------|---|-------|-------|---------|--------|-------|
| L.VLDL.C   | rs191238346 | 11 | 39167052  | A | 0.247 | 0.044 | 2.9E-08 | 0.0023 | 40.6  |
| L.VLDL.C   | rs2001945   | 8  | 126477978 | C | 0.058 | 0.010 | 7E-09   | 0.0017 | 35.2  |
| L.VLDL.C   | rs34482346  | 7  | 72915521  | C | 0.128 | 0.015 | 1.4E-16 | 0.0035 | 74.5  |
| L.VLDL.C   | rs4296389   | 2  | 21142994  | T | 0.074 | 0.011 | 4.1E-12 | 0.0024 | 50.4  |
| L.VLDL.C   | rs438811    | 19 | 45416741  | T | 0.094 | 0.012 | 1.8E-14 | 0.0032 | 67.5  |
| L.VLDL.C   | rs579674    | 11 | 116528224 | G | 0.088 | 0.013 | 1E-11   | 0.0024 | 50.4  |
| L.VLDL.C   | rs7115242   | 11 | 116908283 | G | 0.092 | 0.016 | 5.1E-09 | 0.0018 | 37.5  |
| L.VLDL.C   | rs71480307  | 11 | 116516873 | A | 0.083 | 0.015 | 4E-08   | 0.0016 | 33.8  |
| L.VLDL.C   | rs72999033  | 19 | 19366632  | T | 0.150 | 0.021 | 2.3E-12 | 0.0025 | 53.2  |
| L.VLDL.C   | rs76975037  | 8  | 19851508  | A | 0.148 | 0.018 | 6.4E-17 | 0.0035 | 74.2  |
| L.VLDL.C   | rs77182215  | 11 | 116942366 | A | 0.200 | 0.029 | 7.1E-12 | 0.0029 | 54.2  |
| L.VLDL.C   | rs821840    | 16 | 56993886  | G | 0.092 | 0.012 | 6.1E-15 | 0.0033 | 70.3  |
| L.VLDL.C   | rs9472125   | 6  | 43756169  | T | 0.093 | 0.016 | 1.4E-08 | 0.0024 | 45.5  |
| L.VLDL.C   | rs964184    | 11 | 116648917 | C | 0.214 | 0.014 | 2.7E-51 | 0.0109 | 233.8 |
| L.VLDL.TG  | rs10455872  | 6  | 161010118 | G | 0.165 | 0.028 | 5.4E-09 | 0.0021 | 40.6  |
| L.VLDL.TG  | rs10889360  | 1  | 63173918  | T | 0.064 | 0.011 | 3E-08   | 0.0016 | 33.7  |
| L.VLDL.TG  | rs1260326   | 2  | 27730940  | C | 0.094 | 0.010 | 9.8E-20 | 0.0041 | 87.3  |
| L.VLDL.TG  | rs1268353   | 11 | 116639692 | T | 0.068 | 0.010 | 3E-11   | 0.0022 | 46.0  |
| L.VLDL.TG  | rs13030345  | 2  | 28003174  | T | 0.070 | 0.013 | 4.2E-08 | 0.0015 | 32.6  |
| L.VLDL.TG  | rs145106713 | 8  | 19942183  | T | 0.243 | 0.044 | 3.4E-08 | 0.0018 | 32.6  |
| L.VLDL.TG  | rs151007118 | 11 | 116583864 | T | 0.226 | 0.034 | 3.4E-11 | 0.0026 | 49.6  |
| L.VLDL.TG  | rs16996148  | 19 | 19658472  | T | 0.123 | 0.020 | 6.9E-10 | 0.0019 | 40.4  |
| L.VLDL.TG  | rs17120347  | 11 | 116996539 | A | 0.086 | 0.015 | 4.8E-09 | 0.0017 | 36.6  |
| L.VLDL.TG  | rs17411024  | 8  | 19852134  | A | 0.154 | 0.018 | 9.6E-18 | 0.0038 | 78.0  |
| L.VLDL.TG  | rs188651594 | 11 | 116673091 | A | 0.241 | 0.043 | 2.3E-08 | 0.0020 | 35.8  |
| L.VLDL.TG  | rs34346326  | 7  | 73016181  | C | 0.110 | 0.013 | 9.4E-17 | 0.0035 | 74.1  |
| L.VLDL.TG  | rs4350231   | 1  | 62922660  | A | 0.071 | 0.011 | 5.5E-11 | 0.0021 | 45.2  |
| L.VLDL.TG  | rs438811    | 19 | 45416741  | T | 0.090 | 0.012 | 2.9E-13 | 0.0029 | 61.2  |
| L.VLDL.TG  | rs579674    | 11 | 116528224 | G | 0.078 | 0.013 | 1.4E-09 | 0.0019 | 39.9  |
| L.VLDL.TG  | rs7115242   | 11 | 116908283 | G | 0.099 | 0.016 | 3.9E-10 | 0.0020 | 43.0  |
| L.VLDL.TG  | rs72999033  | 19 | 19366632  | T | 0.133 | 0.021 | 4.6E-10 | 0.0020 | 41.9  |
| L.VLDL.TG  | rs77182215  | 11 | 116942366 | A | 0.202 | 0.029 | 4.3E-12 | 0.0029 | 55.3  |
| L.VLDL.TG  | rs9472125   | 6  | 43756169  | T | 0.091 | 0.016 | 3.1E-08 | 0.0023 | 43.4  |
| L.VLDL.TG  | rs964184    | 11 | 116648917 | C | 0.206 | 0.014 | 7E-48   | 0.0101 | 217.5 |
| XL.VLDL.TG | rs10455872  | 6  | 161010118 | G | 0.181 | 0.028 | 1.2E-10 | 0.0026 | 49.3  |
| XL.VLDL.TG | rs1168041   | 1  | 62960250  | C | 0.084 | 0.011 | 1E-13   | 0.0028 | 61.2  |
| XL.VLDL.TG | rs1260326   | 2  | 27730940  | C | 0.093 | 0.010 | 1.4E-19 | 0.0040 | 86.3  |
| XL.VLDL.TG | rs1268353   | 11 | 116639692 | T | 0.057 | 0.010 | 1.2E-08 | 0.0016 | 33.7  |
| XL.VLDL.TG | rs13234157  | 7  | 72971728  | A | 0.111 | 0.015 | 3.2E-13 | 0.0027 | 58.5  |
| XL.VLDL.TG | rs151007118 | 11 | 116583864 | T | 0.209 | 0.033 | 5E-10   | 0.0023 | 43.7  |
| XL.VLDL.TG | rs17120347  | 11 | 116996539 | A | 0.082 | 0.014 | 1.8E-08 | 0.0016 | 33.8  |
| XL.VLDL.TG | rs17216525  | 19 | 19662220  | T | 0.129 | 0.021 | 9.2E-10 | 0.0019 | 40.1  |
| XL.VLDL.TG | rs17411024  | 8  | 19852134  | A | 0.125 | 0.017 | 8.2E-13 | 0.0025 | 54.1  |
| XL.VLDL.TG | rs181583353 | 11 | 39151067  | G | 0.242 | 0.044 | 4.6E-08 | 0.0022 | 39.8  |
| XL.VLDL.TG | rs186696265 | 6  | 161111700 | T | 0.326 | 0.057 | 1.9E-08 | 0.0020 | 35.1  |
| XL.VLDL.TG | rs4296389   | 2  | 21142994  | T | 0.059 | 0.011 | 2.4E-08 | 0.0015 | 32.5  |
| XL.VLDL.TG | rs438811    | 19 | 45416741  | T | 0.081 | 0.013 | 5E-10   | 0.0023 | 44.6  |
| XL.VLDL.TG | rs579674    | 11 | 116528224 | G | 0.081 | 0.013 | 2.6E-10 | 0.0020 | 43.4  |

|             |             |    |           |   |       |       |         |        |       |
|-------------|-------------|----|-----------|---|-------|-------|---------|--------|-------|
| XL.VLDL.TG  | rs72999033  | 19 | 19366632  | T | 0.144 | 0.022 | 1.3E-10 | 0.0021 | 45.3  |
| XL.VLDL.TG  | rs77182215  | 11 | 116942366 | A | 0.182 | 0.029 | 3.1E-10 | 0.0024 | 45.7  |
| XL.VLDL.TG  | rs964184    | 11 | 116648917 | C | 0.179 | 0.014 | 7E-37   | 0.0076 | 165.4 |
| XXL.VLDL.TG | rs10455872  | 6  | 161010118 | G | 0.194 | 0.028 | 4.8E-12 | 0.0029 | 56.6  |
| XXL.VLDL.TG | rs1168041   | 1  | 62960250  | C | 0.077 | 0.011 | 7.7E-12 | 0.0024 | 51.6  |
| XXL.VLDL.TG | rs1260326   | 2  | 27730940  | C | 0.093 | 0.010 | 8E-20   | 0.0040 | 87.2  |
| XXL.VLDL.TG | rs1268353   | 11 | 116639692 | T | 0.056 | 0.010 | 3.1E-08 | 0.0015 | 31.7  |
| XXL.VLDL.TG | rs13233571  | 7  | 72971231  | T | 0.094 | 0.015 | 6.4E-10 | 0.0019 | 41.4  |
| XXL.VLDL.TG | rs151007118 | 11 | 116583864 | T | 0.201 | 0.033 | 2.1E-09 | 0.0021 | 40.5  |
| XXL.VLDL.TG | rs17217098  | 19 | 19702384  | A | 0.117 | 0.021 | 1.9E-08 | 0.0015 | 33.3  |
| XXL.VLDL.TG | rs483082    | 19 | 45416178  | T | 0.097 | 0.012 | 1.2E-15 | 0.0034 | 72.9  |
| XXL.VLDL.TG | rs72999033  | 19 | 19366632  | T | 0.126 | 0.021 | 2.3E-09 | 0.0018 | 38.3  |
| XXL.VLDL.TG | rs77182215  | 11 | 116942366 | A | 0.167 | 0.029 | 6.8E-09 | 0.0020 | 38.6  |
| XXL.VLDL.TG | rs77729186  | 8  | 19826318  | G | 0.116 | 0.017 | 9.5E-12 | 0.0022 | 48.5  |
| XXL.VLDL.TG | rs821840    | 16 | 56993886  | G | 0.065 | 0.012 | 2.2E-08 | 0.0017 | 35.9  |
| XXL.VLDL.TG | rs964184    | 11 | 116648917 | C | 0.153 | 0.014 | 1.8E-27 | 0.0056 | 120.6 |
| XL.HDL.TG   | rs11096689  | 2  | 21140540  | T | 0.073 | 0.011 | 9.9E-11 | 0.0021 | 44.4  |
| XL.HDL.TG   | rs111543310 | 15 | 59531818  | C | 0.492 | 0.049 | 1.5E-23 | 0.0076 | 147.3 |
| XL.HDL.TG   | rs112835635 | 15 | 59351989  | G | 0.331 | 0.035 | 2.3E-20 | 0.0050 | 100.3 |
| XL.HDL.TG   | rs112884731 | 15 | 59504897  | C | 0.712 | 0.057 | 1.8E-35 | 0.0094 | 169.1 |
| XL.HDL.TG   | rs112925355 | 15 | 59125988  | A | 0.290 | 0.029 | 1.9E-23 | 0.0051 | 110.7 |
| XL.HDL.TG   | rs113298164 | 15 | 58855748  | T | 0.750 | 0.047 | 1.1E-55 | 0.0152 | 273.8 |
| XL.HDL.TG   | rs113531395 | 17 | 4886829   | T | 0.204 | 0.036 | 2.4E-08 | 0.0021 | 41.0  |
| XL.HDL.TG   | rs114716552 | 15 | 58600902  | G | 0.152 | 0.021 | 9E-13   | 0.0031 | 60.6  |
| XL.HDL.TG   | rs116142092 | 15 | 59751872  | T | 0.473 | 0.050 | 1.5E-20 | 0.0052 | 93.6  |
| XL.HDL.TG   | rs11632970  | 15 | 58837515  | C | 0.078 | 0.012 | 5.5E-10 | 0.0022 | 48.3  |
| XL.HDL.TG   | rs11638718  | 15 | 58079462  | G | 0.071 | 0.012 | 7.4E-09 | 0.0016 | 35.0  |
| XL.HDL.TG   | rs116802199 | 17 | 4801101   | C | 0.217 | 0.032 | 1.1E-11 | 0.0027 | 49.8  |
| XL.HDL.TG   | rs116869421 | 15 | 58709436  | C | 0.360 | 0.051 | 4.1E-12 | 0.0034 | 66.0  |
| XL.HDL.TG   | rs117386336 | 15 | 58568077  | T | 0.218 | 0.039 | 3.3E-08 | 0.0018 | 35.6  |
| XL.HDL.TG   | rs117459981 | 15 | 58619066  | C | 0.279 | 0.047 | 4.3E-09 | 0.0020 | 43.1  |
| XL.HDL.TG   | rs117597286 | 15 | 58587369  | C | 0.260 | 0.036 | 1.3E-12 | 0.0030 | 57.2  |
| XL.HDL.TG   | rs117749052 | 15 | 58749309  | C | 0.276 | 0.037 | 1.6E-13 | 0.0044 | 85.0  |
| XL.HDL.TG   | rs117806344 | 15 | 58693213  | T | 0.377 | 0.051 | 2.6E-13 | 0.0037 | 70.8  |
| XL.HDL.TG   | rs118078695 | 15 | 58686409  | A | 0.295 | 0.051 | 1.3E-08 | 0.0025 | 48.2  |
| XL.HDL.TG   | rs12442723  | 15 | 59458663  | C | 0.102 | 0.013 | 1.2E-15 | 0.0032 | 69.7  |
| XL.HDL.TG   | rs1268353   | 11 | 116639692 | T | 0.061 | 0.010 | 2.3E-09 | 0.0017 | 37.5  |
| XL.HDL.TG   | rs12899090  | 15 | 59901576  | G | 0.096 | 0.015 | 5.8E-10 | 0.0028 | 54.8  |
| XL.HDL.TG   | rs1318175   | 15 | 58586129  | T | 0.157 | 0.013 | 1.3E-32 | 0.0072 | 155.1 |
| XL.HDL.TG   | rs13329672  | 15 | 58699937  | T | 0.156 | 0.011 | 3.3E-41 | 0.0095 | 206.9 |
| XL.HDL.TG   | rs138195472 | 15 | 58672107  | T | 0.357 | 0.035 | 2.6E-24 | 0.0064 | 114.3 |
| XL.HDL.TG   | rs138690293 | 15 | 59310760  | C | 0.719 | 0.107 | 3.1E-11 | 0.0038 | 62.0  |
| XL.HDL.TG   | rs142538594 | 15 | 58192308  | G | 0.383 | 0.055 | 7E-12   | 0.0057 | 91.8  |
| XL.HDL.TG   | rs142855631 | 15 | 59286876  | T | 0.728 | 0.108 | 2.5E-11 | 0.0038 | 61.4  |
| XL.HDL.TG   | rs142887188 | 15 | 60132580  | G | 0.257 | 0.042 | 1.1E-09 | 0.0025 | 42.5  |
| XL.HDL.TG   | rs144149061 | 15 | 58500098  | T | 0.838 | 0.131 | 2.3E-10 | 0.0049 | 66.7  |
| XL.HDL.TG   | rs145347194 | 15 | 58670135  | C | 0.221 | 0.022 | 4.4E-23 | 0.0063 | 135.9 |
| XL.HDL.TG   | rs146842281 | 15 | 59356659  | T | 0.256 | 0.022 | 4.4E-31 | 0.0075 | 146.3 |
| XL.HDL.TG   | rs148828254 | 15 | 58571224  | A | 0.209 | 0.031 | 5.1E-11 | 0.0023 | 50.7  |

|           |             |    |           |   |       |       |         |        |       |
|-----------|-------------|----|-----------|---|-------|-------|---------|--------|-------|
| XL.HDL.TG | rs148902553 | 15 | 59776836  | C | 0.477 | 0.050 | 8.5E-21 | 0.0055 | 94.2  |
| XL.HDL.TG | rs150536132 | 19 | 19679560  | T | 0.166 | 0.030 | 3.2E-08 | 0.0023 | 41.1  |
| XL.HDL.TG | rs1532085   | 15 | 58683366  | G | 0.264 | 0.010 | 9E-155  | 0.0336 | 748.0 |
| XL.HDL.TG | rs1540037   | 18 | 47182664  | G | 0.092 | 0.012 | 7.9E-14 | 0.0029 | 63.3  |
| XL.HDL.TG | rs16939881  | 15 | 58471979  | C | 0.315 | 0.028 | 1E-29   | 0.0084 | 164.1 |
| XL.HDL.TG | rs1711062   | 15 | 58508790  | C | 0.105 | 0.011 | 4.9E-22 | 0.0052 | 112.0 |
| XL.HDL.TG | rs17231506  | 16 | 56994528  | T | 0.069 | 0.011 | 3.1E-10 | 0.0020 | 43.2  |
| XL.HDL.TG | rs181412360 | 15 | 59158953  | C | 0.483 | 0.038 | 1.1E-36 | 0.0097 | 174.4 |
| XL.HDL.TG | rs181450801 | 15 | 59326120  | A | 0.463 | 0.076 | 1.9E-09 | 0.0031 | 58.6  |
| XL.HDL.TG | rs181835401 | 1  | 63135955  | A | 0.090 | 0.011 | 4.4E-15 | 0.0031 | 67.2  |
| XL.HDL.TG | rs182776276 | 15 | 59254589  | G | 0.732 | 0.060 | 5.7E-34 | 0.0091 | 157.9 |
| XL.HDL.TG | rs182785673 | 15 | 58073964  | T | 0.466 | 0.076 | 1.3E-09 | 0.0028 | 50.4  |
| XL.HDL.TG | rs183276229 | 15 | 58742906  | C | 0.310 | 0.035 | 6.3E-18 | 0.0046 | 81.3  |
| XL.HDL.TG | rs183975744 | 15 | 59052479  | T | 0.803 | 0.120 | 3.4E-11 | 0.0032 | 50.0  |
| XL.HDL.TG | rs185241689 | 15 | 59143155  | G | 0.836 | 0.114 | 3.8E-13 | 0.0042 | 68.1  |
| XL.HDL.TG | rs185533289 | 15 | 58782289  | C | 0.307 | 0.055 | 3.5E-08 | 0.0019 | 32.2  |
| XL.HDL.TG | rs186603838 | 15 | 58865534  | A | 0.166 | 0.030 | 4E-08   | 0.0018 | 31.5  |
| XL.HDL.TG | rs188131745 | 15 | 58553702  | A | 0.464 | 0.079 | 6.2E-09 | 0.0027 | 51.3  |
| XL.HDL.TG | rs189375934 | 15 | 60196526  | G | 0.429 | 0.053 | 8.4E-16 | 0.0042 | 73.1  |
| XL.HDL.TG | rs189418461 | 15 | 59725202  | G | 0.470 | 0.050 | 9.9E-21 | 0.0053 | 94.0  |
| XL.HDL.TG | rs190121281 | 19 | 19252779  | A | 0.196 | 0.033 | 2.7E-09 | 0.0026 | 46.0  |
| XL.HDL.TG | rs190548956 | 15 | 59985051  | A | 0.266 | 0.042 | 3.8E-10 | 0.0023 | 43.9  |
| XL.HDL.TG | rs191448950 | 1  | 55584844  | A | 0.217 | 0.032 | 1.3E-11 | 0.0022 | 48.4  |
| XL.HDL.TG | rs192060595 | 15 | 58907990  | C | 0.329 | 0.057 | 9.8E-09 | 0.0025 | 43.1  |
| XL.HDL.TG | rs192630343 | 15 | 59286102  | A | 0.709 | 0.107 | 5.1E-11 | 0.0038 | 62.3  |
| XL.HDL.TG | rs192924868 | 15 | 59231939  | C | 0.115 | 0.021 | 3.1E-08 | 0.0020 | 37.9  |
| XL.HDL.TG | rs193092110 | 15 | 58730460  | A | 0.303 | 0.035 | 2.8E-17 | 0.0044 | 77.7  |
| XL.HDL.TG | rs1998013   | 1  | 55958030  | T | 0.230 | 0.035 | 1.1E-10 | 0.0022 | 48.1  |
| XL.HDL.TG | rs2044332   | 15 | 58646641  | A | 0.122 | 0.014 | 8.2E-17 | 0.0038 | 81.5  |
| XL.HDL.TG | rs2070895   | 15 | 58723939  | A | 0.302 | 0.012 | 3E-148  | 0.0337 | 749.9 |
| XL.HDL.TG | rs2217970   | 15 | 60090978  | A | 0.130 | 0.019 | 3.8E-11 | 0.0025 | 49.2  |
| XL.HDL.TG | rs2414585   | 15 | 58785756  | G | 0.308 | 0.048 | 1.6E-10 | 0.0028 | 54.5  |
| XL.HDL.TG | rs2642636   | 15 | 58363242  | G | 0.072 | 0.010 | 3.7E-12 | 0.0024 | 52.5  |
| XL.HDL.TG | rs28370984  | 15 | 58629308  | C | 0.344 | 0.032 | 9.9E-27 | 0.0066 | 127.5 |
| XL.HDL.TG | rs28601761  | 8  | 126500031 | G | 0.068 | 0.010 | 1.8E-11 | 0.0023 | 49.2  |
| XL.HDL.TG | rs2881925   | 2  | 20390694  | A | 0.056 | 0.010 | 1.4E-08 | 0.0016 | 34.0  |
| XL.HDL.TG | rs2932196   | 15 | 57912338  | T | 0.056 | 0.010 | 2.5E-08 | 0.0015 | 32.4  |
| XL.HDL.TG | rs34101191  | 15 | 58793567  | A | 0.075 | 0.010 | 1.4E-12 | 0.0028 | 59.8  |
| XL.HDL.TG | rs35138338  | 15 | 58744481  | T | 0.089 | 0.013 | 3E-11   | 0.0033 | 70.4  |
| XL.HDL.TG | rs35684611  | 15 | 58721302  | G | 0.138 | 0.014 | 2.4E-21 | 0.0047 | 100.8 |
| XL.HDL.TG | rs426684    | 15 | 58662280  | T | 0.066 | 0.010 | 4.1E-11 | 0.0022 | 47.3  |
| XL.HDL.TG | rs439401    | 19 | 45414451  | C | 0.086 | 0.011 | 1.3E-14 | 0.0032 | 68.3  |
| XL.HDL.TG | rs4775039   | 15 | 58670897  | G | 0.160 | 0.011 | 1.4E-45 | 0.0129 | 280.9 |
| XL.HDL.TG | rs479084    | 15 | 58666087  | G | 0.120 | 0.010 | 1.1E-29 | 0.0067 | 145.7 |
| XL.HDL.TG | rs490098    | 15 | 58691225  | A | 0.179 | 0.013 | 1.9E-42 | 0.0093 | 202.4 |
| XL.HDL.TG | rs4939873   | 18 | 47062054  | T | 0.133 | 0.023 | 1.4E-08 | 0.0017 | 36.4  |
| XL.HDL.TG | rs55817218  | 15 | 58562006  | A | 0.170 | 0.020 | 6.2E-17 | 0.0041 | 88.9  |
| XL.HDL.TG | rs55861554  | 15 | 58761235  | C | 0.067 | 0.011 | 6.3E-10 | 0.0020 | 43.5  |
| XL.HDL.TG | rs56296027  | 2  | 21134011  | C | 0.062 | 0.011 | 3.2E-08 | 0.0015 | 32.7  |

|           |            |    |           |   |       |       |         |        |       |
|-----------|------------|----|-----------|---|-------|-------|---------|--------|-------|
| XL.HDL.TG | rs572107   | 15 | 59055810  | C | 0.069 | 0.010 | 5.2E-11 | 0.0022 | 46.9  |
| XL.HDL.TG | rs61999891 | 15 | 58299599  | A | 0.122 | 0.017 | 3.5E-12 | 0.0030 | 58.9  |
| XL.HDL.TG | rs62001693 | 15 | 58614892  | A | 0.221 | 0.034 | 1.3E-10 | 0.0028 | 59.5  |
| XL.HDL.TG | rs6589592  | 11 | 116957907 | G | 0.105 | 0.016 | 2E-11   | 0.0023 | 50.6  |
| XL.HDL.TG | rs7178935  | 15 | 59368167  | A | 0.064 | 0.011 | 1E-08   | 0.0016 | 34.6  |
| XL.HDL.TG | rs72739708 | 15 | 57733779  | T | 0.114 | 0.021 | 5E-08   | 0.0015 | 32.3  |
| XL.HDL.TG | rs73424577 | 15 | 58869185  | G | 0.305 | 0.028 | 5.5E-27 | 0.0064 | 128.9 |
| XL.HDL.TG | rs73959582 | 18 | 47148886  | C | 0.097 | 0.014 | 2.4E-11 | 0.0024 | 52.5  |
| XL.HDL.TG | rs74073060 | 1  | 55638930  | A | 0.218 | 0.037 | 8.1E-09 | 0.0020 | 39.1  |
| XL.HDL.TG | rs74537322 | 15 | 58342102  | G | 0.406 | 0.065 | 7.2E-10 | 0.0028 | 49.6  |
| XL.HDL.TG | rs75870978 | 15 | 58177266  | G | 0.391 | 0.066 | 4.6E-09 | 0.0055 | 60.8  |
| XL.HDL.TG | rs76116860 | 15 | 59834938  | C | 0.339 | 0.041 | 3.1E-16 | 0.0040 | 78.2  |
| XL.HDL.TG | rs76212899 | 15 | 58263295  | G | 0.157 | 0.027 | 5.2E-09 | 0.0022 | 42.6  |
| XL.HDL.TG | rs76438892 | 15 | 58687932  | G | 0.271 | 0.047 | 1.1E-08 | 0.0018 | 35.7  |
| XL.HDL.TG | rs78321025 | 15 | 58108078  | A | 0.248 | 0.034 | 9.6E-13 | 0.0035 | 67.9  |
| XL.HDL.TG | rs79202680 | 17 | 4692640   | T | 0.242 | 0.035 | 5.2E-12 | 0.0029 | 55.8  |
| XL.HDL.TG | rs8025975  | 15 | 59696602  | G | 0.097 | 0.015 | 4.2E-10 | 0.0021 | 44.8  |
| XL.HDL.TG | rs8042174  | 15 | 58685970  | C | 0.206 | 0.020 | 6.8E-25 | 0.0059 | 128.8 |
| XL.HDL.TG | rs8043310  | 15 | 58731818  | A | 0.360 | 0.039 | 1.2E-19 | 0.0050 | 96.6  |
| XL.HDL.TG | rs8100204  | 19 | 19393714  | A | 0.096 | 0.016 | 4.3E-09 | 0.0021 | 44.9  |
| XL.HDL.TG | rs935202   | 15 | 58457569  | A | 0.083 | 0.011 | 1.1E-14 | 0.0031 | 67.2  |
| XL.HDL.TG | rs938507   | 15 | 58582034  | A | 0.139 | 0.014 | 6.8E-22 | 0.0045 | 97.2  |
| XL.HDL.TG | rs964184   | 11 | 116648917 | C | 0.155 | 0.014 | 1.1E-27 | 0.0057 | 123.4 |
| XL.HDL.TG | rs97384    | 11 | 61624181  | C | 0.084 | 0.010 | 1.2E-15 | 0.0034 | 74.0  |

**Supplementary Table 5. Genetic instruments for lipid drug targets, as selected and extracted from Global Lipids Genetics Consortium (GLGC) GWAS dataset.**

| Phenotype | Target  | Proxy treatment  | SNP        | Chr | Position (hg18) | Eff_allele | Effect | SE    | P-value  | R2     | F      |
|-----------|---------|------------------|------------|-----|-----------------|------------|--------|-------|----------|--------|--------|
| HDL-C     | CETP    | CETP inhibitors  | rs12446867 | 16  | 57052901        | G          | 0.034  | 0.004 | 1.8E-16  | 0.0005 | 84.0   |
| HDL-C     | CETP    | CETP inhibitors  | rs12448528 | 16  | 56985555        | G          | 0.199  | 0.005 | 2.1E-344 | 0.0139 | 2577.3 |
| HDL-C     | CETP    | CETP inhibitors  | rs12597002 | 16  | 57002404        | C          | 0.085  | 0.004 | 1.1E-102 | 0.0029 | 535.4  |
| HDL-C     | CETP    | CETP inhibitors  | rs12720917 | 16  | 57019392        | C          | 0.098  | 0.006 | 5.9E-68  | 0.0023 | 407.0  |
| HDL-C     | CETP    | CETP inhibitors  | rs12928552 | 16  | 57048707        | G          | 0.050  | 0.008 | 2.2E-09  | 0.0002 | 35.6   |
| HDL-C     | CETP    | CETP inhibitors  | rs13306673 | 16  | 56900931        | C          | 0.098  | 0.006 | 2.8E-48  | 0.0016 | 288.0  |
| HDL-C     | CETP    | CETP inhibitors  | rs13306677 | 16  | 56926195        | A          | 0.090  | 0.006 | 1.4E-50  | 0.0014 | 268.4  |
| HDL-C     | CETP    | CETP inhibitors  | rs1566439  | 16  | 57024662        | C          | 0.027  | 0.004 | 3.5E-15  | 0.0004 | 67.9   |
| HDL-C     | CETP    | CETP inhibitors  | rs16963520 | 16  | 56936563        | A          | 0.071  | 0.007 | 3.1E-25  | 0.0014 | 130.7  |
| HDL-C     | CETP    | CETP inhibitors  | rs17290922 | 16  | 57024317        | G          | 0.055  | 0.008 | 3.4E-13  | 0.0006 | 58.9   |
| HDL-C     | CETP    | CETP inhibitors  | rs17370142 | 16  | 57050348        | T          | 0.034  | 0.006 | 1.2E-11  | 0.0002 | 43.8   |
| HDL-C     | CETP    | CETP inhibitors  | rs1864163  | 16  | 56997233        | G          | 0.225  | 0.004 | 3.6E-573 | 0.0198 | 3745.5 |
| HDL-C     | CETP    | CETP inhibitors  | rs1875236  | 16  | 57033696        | A          | 0.059  | 0.007 | 1.4E-18  | 0.0006 | 113.9  |
| HDL-C     | CETP    | CETP inhibitors  | rs247615   | 16  | 56984763        | A          | 0.076  | 0.004 | 2.9E-62  | 0.0020 | 371.2  |
| HDL-C     | CETP    | CETP inhibitors  | rs247616   | 16  | 56989590        | T          | 0.243  | 0.004 | 1.2E-802 | 0.0245 | 4650.2 |
| HDL-C     | CETP    | CETP inhibitors  | rs289719   | 16  | 57009941        | T          | 0.113  | 0.004 | 5.4E-173 | 0.0056 | 1048.7 |
| HDL-C     | CETP    | CETP inhibitors  | rs289726   | 16  | 57074451        | T          | 0.036  | 0.004 | 1.3E-22  | 0.0006 | 112.2  |
| HDL-C     | CETP    | CETP inhibitors  | rs289745   | 16  | 57019532        | A          | 0.028  | 0.004 | 2.3E-20  | 0.0004 | 66.6   |
| HDL-C     | CETP    | CETP inhibitors  | rs4329913  | 16  | 56905432        | C          | 0.041  | 0.006 | 1.4E-11  | 0.0006 | 54.1   |
| HDL-C     | CETP    | CETP inhibitors  | rs5883     | 16  | 57007353        | T          | 0.115  | 0.008 | 1.8E-31  | 0.0015 | 254.0  |
| HDL-C     | CETP    | CETP inhibitors  | rs7188963  | 16  | 56931565        | C          | 0.059  | 0.004 | 3.2E-39  | 0.0012 | 220.1  |
| HDL-C     | CETP    | CETP inhibitors  | rs7204290  | 16  | 56968039        | G          | 0.030  | 0.004 | 1.5E-16  | 0.0004 | 71.4   |
| HDL-C     | CETP    | CETP inhibitors  | rs7499911  | 16  | 57036440        | G          | 0.060  | 0.011 | 1.3E-08  | 0.0004 | 40.4   |
| HDL-C     | CETP    | CETP inhibitors  | rs9938160  | 16  | 56984590        | C          | 0.060  | 0.005 | 3.2E-25  | 0.0014 | 125.6  |
| LDL-C     | HMGCR   | Statins          | rs10066707 | 5   | 74560579        | A          | 0.050  | 0.005 | 3.0E-19  | 0.0012 | 108.1  |
| LDL-C     | HMGCR   | Statins          | rs10515198 | 5   | 74641560        | A          | 0.060  | 0.006 | 6.0E-22  | 0.0007 | 114.7  |
| LDL-C     | HMGCR   | Statins          | rs3857388  | 5   | 74620377        | C          | 0.042  | 0.006 | 2.2E-11  | 0.0004 | 68.5   |
| LDL-C     | HMGCR   | Statins          | rs7703051  | 5   | 74625487        | A          | 0.073  | 0.004 | 1.4E-77  | 0.0026 | 443.6  |
| LDL-C     | NPC1L1  | Ezetimibe        | rs2073547  | 7   | 44582331        | G          | 0.049  | 0.005 | 1.9E-21  | 0.0007 | 125.0  |
| LDL-C     | NPC1L1  | Ezetimibe        | rs217386   | 7   | 44600695        | G          | 0.036  | 0.004 | 1.2E-19  | 0.0006 | 110.2  |
| LDL-C     | NPC1L1  | Ezetimibe        | rs7798185  | 7   | 44570717        | A          | 0.041  | 0.007 | 1.9E-09  | 0.0004 | 37.3   |
| LDL-C     | PCSK9   | PCSK9 inhibitors | rs10493176 | 1   | 55538552        | T          | 0.078  | 0.010 | 2.5E-14  | 0.0012 | 105.4  |
| LDL-C     | PCSK9   | PCSK9 inhibitors | rs11206510 | 1   | 55496039        | T          | 0.083  | 0.005 | 2.4E-53  | 0.0018 | 312.2  |
| LDL-C     | PCSK9   | PCSK9 inhibitors | rs11583974 | 1   | 55551718        | A          | 0.065  | 0.012 | 4.0E-09  | 0.0002 | 24.5   |
| LDL-C     | PCSK9   | PCSK9 inhibitors | rs12067569 | 1   | 55528629        | A          | 0.089  | 0.010 | 2.0E-17  | 0.0005 | 85.3   |
| LDL-C     | PCSK9   | PCSK9 inhibitors | rs2479394  | 1   | 55486064        | G          | 0.039  | 0.004 | 1.6E-19  | 0.0006 | 105.1  |
| LDL-C     | PCSK9   | PCSK9 inhibitors | rs2479409  | 1   | 55504650        | G          | 0.064  | 0.004 | 2.5E-50  | 0.0018 | 317.0  |
| LDL-C     | PCSK9   | PCSK9 inhibitors | rs2483205  | 1   | 55518316        | C          | 0.051  | 0.005 | 4.7E-20  | 0.0013 | 102.6  |
| LDL-C     | PCSK9   | PCSK9 inhibitors | rs4927193  | 1   | 55509872        | T          | 0.035  | 0.006 | 4.3E-11  | 0.0003 | 48.7   |
| LDL-C     | PCSK9   | PCSK9 inhibitors | rs502576   | 1   | 55512882        | G          | 0.065  | 0.007 | 2.9E-22  | 0.0015 | 122.3  |
| LDL-C     | PCSK9   | PCSK9 inhibitors | rs585131   | 1   | 55524116        | T          | 0.064  | 0.005 | 2.7E-35  | 0.0012 | 205.3  |
| LDL-C     | PCSK9   | PCSK9 inhibitors | rs7552841  | 1   | 55518752        | T          | 0.037  | 0.004 | 5.4E-15  | 0.0006 | 88.1   |
| LDL-C     | ABCG5G8 | Bile acid resins | rs10208987 | 2   | 44043135        | T          | 0.049  | 0.007 | 2.4E-12  | 0.0004 | 66.8   |
| LDL-C     | ABCG5G8 | Bile acid resins | rs1025447  | 2   | 44022970        | C          | 0.042  | 0.005 | 3.8E-16  | 0.0005 | 80.2   |
| LDL-C     | ABCG5G8 | Bile acid resins | rs4148214  | 2   | 44079004        | T          | 0.039  | 0.004 | 3.8E-25  | 0.0007 | 129.8  |
| LDL-C     | ABCG5G8 | Bile acid resins | rs4953023  | 2   | 44074000        | G          | 0.131  | 0.007 | 1.7E-66  | 0.0027 | 454.5  |
| LDL-C     | ABCG5G8 | Bile acid resins | rs6544713  | 2   | 44073881        | T          | 0.081  | 0.004 | 4.8E-83  | 0.0027 | 467.8  |
| LDL-C     | ABCG5G8 | Bile acid resins | rs75279593 | 2   | 44085035        | A          | 0.074  | 0.012 | 1.4E-08  | 0.0005 | 42.7   |

|       |      |              |           |    |          |   |       |       |          |        |        |
|-------|------|--------------|-----------|----|----------|---|-------|-------|----------|--------|--------|
| LDL-C | LDLR | LDL receptor | rs1010679 | 19 | 11207102 | T | 0.102 | 0.006 | 3.5E-54  | 0.0030 | 253.7  |
| LDL-C | LDLR | LDL receptor | rs3786721 | 19 | 11146499 | T | 0.047 | 0.004 | 2.9E-31  | 0.0011 | 178.3  |
| LDL-C | LDLR | LDL receptor | rs3786722 | 19 | 11161537 | C | 0.075 | 0.004 | 5.5E-63  | 0.0021 | 358.8  |
| LDL-C | LDLR | LDL receptor | rs379309  | 19 | 11284302 | C | 0.031 | 0.004 | 1.4E-13  | 0.0005 | 81.8   |
| LDL-C | LDLR | LDL receptor | rs5742911 | 19 | 11243445 | A | 0.061 | 0.006 | 4.8E-24  | 0.0014 | 111.9  |
| LDL-C | LDLR | LDL receptor | rs5927    | 19 | 11233941 | G | 0.035 | 0.005 | 2.8E-13  | 0.0005 | 75.9   |
| LDL-C | LDLR | LDL receptor | rs6511720 | 19 | 11202306 | G | 0.221 | 0.006 | 3.8E-262 | 0.0086 | 1479.6 |
| LDL-C | LDLR | LDL receptor | rs688     | 19 | 11227602 | T | 0.054 | 0.004 | 1.0E-43  | 0.0014 | 240.8  |

**Supplementary Table 6. Power calculations for the Mendelian randomization analyses performed in the current study.**

| Lipid trait                            | Variance explained (R <sup>2</sup> ) <sup>a</sup> | Maximum / Minimum association estimate <sup>b</sup> for 1-β >0.80 |                  |                          |
|----------------------------------------|---------------------------------------------------|-------------------------------------------------------------------|------------------|--------------------------|
|                                        |                                                   | Small vessel stroke                                               | WMH volume       | Intracerebral hemorrhage |
| <b>Sample</b>                          |                                                   | 298,777                                                           | 10,597           | 3,026                    |
| <b>Number of cases</b>                 |                                                   | 11,710                                                            |                  | 1,545                    |
| <b>Blood lipid levels</b>              |                                                   | OR                                                                | beta (max / min) | OR (max / min)           |
| HDL-C                                  | 12.4%                                             | ≤0.93 / ≥1.08                                                     | ≤-0.06 / ≥0.06   | ≤0.75 / ≥1.33            |
| LDL-C                                  | 11.6%                                             | ≤0.93 / ≥1.08                                                     | ≤-0.07 / ≥0.07   | ≤0.74 / ≥1.35            |
| TG                                     | 9.31%                                             | ≤0.92 / ≥1.09                                                     | ≤-0.09 / ≥0.09   | ≤0.71 / ≥1.40            |
| <b>Lipid drug targets<sup>c</sup></b>  |                                                   |                                                                   |                  |                          |
| <i>CETP</i>                            | 9.43%                                             | ≤0.92 / ≥1.09                                                     | ≤-0.09 / ≥0.09   | ≤0.72 / ≥1.39            |
| <i>HMGCR</i>                           | 0.48%                                             | ≤0.72 / ≥1.39                                                     | ≤-0.39 / ≥0.39   | ≤0.25 / ≥3.97            |
| <i>NPC1L1</i>                          | 0.18%                                             | ≤0.58 / ≥1.68                                                     | ≤-0.64 / ≥0.64   | ≤0.12 / ≥8.03            |
| <i>PCSK9</i>                           | 1.11%                                             | ≤0.79 / ≥1.26                                                     | ≤-0.26 / ≥0.26   | ≤0.39 / ≥2.57            |
| <i>ABCG5/G8</i>                        | 0.74%                                             | ≤0.76 / ≥1.31                                                     | ≤-0.32 / ≥0.32   | ≤0.32 / ≥3.13            |
| <i>LDLR</i>                            | 1.87%                                             | ≤0.83 / ≥1.20                                                     | ≤-0.20 / ≥0.20   | ≤0.48 / ≥2.08            |
| <i>PPARA</i>                           | -                                                 | -                                                                 | -                | -                        |
| <i>ANGPTL3</i>                         | 0.21%                                             | ≤0.63 / ≥1.59                                                     | ≤-0.60 / ≥0.60   | ≤0.14 / ≥7.09            |
| <i>ANGPTL4</i>                         | -                                                 | -                                                                 | -                | -                        |
| <i>APOC3</i>                           | 2.25%                                             | ≤0.85 / ≥1.18                                                     | ≤-0.19 / ≥0.19   | ≤0.51 / ≥1.95            |
| <i>LPL</i>                             | 1.65%                                             | ≤0.83 / ≥1.21                                                     | ≤-0.22 / ≥0.22   | ≤0.46 / ≥2.18            |
| <b>Lipoprotein particle components</b> |                                                   |                                                                   |                  |                          |
| S.HDL.TG                               | 8.89%                                             | ≤0.92 / ≥1.09                                                     | ≤-0.09 / ≥0.09   | ≤0.71 / ≥1.41            |
| M.HDL.C                                | 4.37%                                             | ≤0.88 / ≥1.13                                                     | ≤-0.13 / ≥0.13   | ≤0.62 / ≥1.62            |
| L.HDL.C                                | 21.5%                                             | ≤0.94 / ≥1.06                                                     | ≤-0.05 / ≥0.05   | ≤0.81 / ≥1.25            |
| XL.HDL.C                               | 13.9%                                             | ≤0.93 / ≥1.07                                                     | ≤-0.06 / ≥0.06   | ≤0.76 / ≥1.32            |
| XL.HDL.TG                              | 47.8%                                             | ≤0.96 / ≥1.04                                                     | ≤-0.04 / ≥0.04   | ≤0.86 / ≥1.16            |
| S.LDL.C                                | 35.9%                                             | ≤0.95 / ≥1.05                                                     | ≤-0.05 / ≥0.05   | ≤0.84 / ≥1.19            |
| M.LDL.C                                | 42.2%                                             | ≤0.95 / ≥1.05                                                     | ≤-0.04 / ≥0.04   | ≤0.85 / ≥1.17            |
| L.LDL.C                                | 45.7%                                             | ≤0.96 / ≥1.04                                                     | ≤-0.04 / ≥0.04   | ≤0.86 / ≥1.16            |
| IDL.C                                  | 42.1%                                             | ≤0.95 / ≥1.05                                                     | ≤-0.04 / ≥0.04   | ≤0.85 / ≥1.17            |
| IDL.TG                                 | 30.8%                                             | ≤0.95 / ≥1.05                                                     | ≤-0.05 / ≥0.05   | ≤0.83 / ≥1.21            |
| XS.VLDL.TG                             | 17.4%                                             | ≤0.93 / ≥1.07                                                     | ≤-0.06 / ≥0.06   | ≤0.78 / ≥1.28            |
| S.VLDL.C                               | 16.3%                                             | ≤0.93 / ≥1.07                                                     | ≤-0.06 / ≥0.06   | ≤0.78 / ≥1.29            |
| S.VLDL.TG                              | 10.8%                                             | ≤0.93 / ≥1.08                                                     | ≤-0.08 / ≥0.08   | ≤0.73 / ≥1.37            |
| M.VLDL.C                               | 11.6%                                             | ≤0.93 / ≥1.08                                                     | ≤-0.07 / ≥0.07   | ≤0.74 / ≥1.35            |
| M.VLDL.TG                              | 7.86%                                             | ≤0.91 / ≥1.10                                                     | ≤-0.10 / ≥0.10   | ≤0.69 / ≥1.44            |
| L.VLDL.C                               | 7.04%                                             | ≤0.91 / ≥1.10                                                     | ≤-0.11 / ≥0.11   | ≤0.68 / ≥1.47            |
| L.VLDL.TG                              | 5.49%                                             | ≤0.89 / ≥1.12                                                     | ≤-0.12 / ≥0.12   | ≤0.65 / ≥1.54            |
| XL.VLDL.TG                             | 4.40%                                             | ≤0.88 / ≥1.13                                                     | ≤-0.13 / ≥0.13   | ≤0.62 / ≥1.62            |
| XXL.VLDL.TG                            | 3.30%                                             | ≤0.87 / ≥1.15                                                     | ≤-0.15 / ≥0.15   | ≤0.57 / ≥1.74            |

Shown are the ranges of associations estimates that could be detected with a power of 1-β>0.8 and at a statistical significance threshold of α<0.05.

<sup>a</sup>  $R^2 = (\beta \times \sqrt{2 \times MAF(1 - MAF)})^2$ , where MAF is the minimum allele frequency and beta is the effect of the SNP on the respective cytokine levels (Park et al 2010, Nat. Genet. 42, 570–575).

<sup>b</sup> Odds Ratios are presented for the binary outcomes (small vessel stroke, intracerebral hemorrhage) and beta coefficients for the continuous outcomes (white matter hyperintensities volume).

<sup>c</sup> The R<sup>2</sup> for CETP, HMGCR, NPC1L1, PCSK9, ABCG5/G8, LDLR, PPARA, ANGPTL3, ANGPTL4, APOC3, and LPL drug targets correspond to the variance explained by variants in these loci for HDL-C, LDL-C, TG levels, as appropriately.

**Supplementary Table 7. Mendelian randomization (MR) association estimates of cholesterol and triglyceride concentrations across lipoprotein particles with small vessel stroke and WMH volume.** Shown are the results derived from IVW MR analyses.

| Outcome                                        | Small vessel stroke |                         |              |       | WMH volume |                        |              |       |
|------------------------------------------------|---------------------|-------------------------|--------------|-------|------------|------------------------|--------------|-------|
|                                                | SNPs (N)            | OR (95%CI)              | p-value      | p-het | SNPs (N)   | beta (95%CI)           | p-value      | p-het |
| <b>Cholesterol in HDL particles</b>            |                     |                         |              |       |            |                        |              |       |
| M.HDL.C                                        | 8                   | 0.84 (0.73-0.96)        | <b>0.007</b> | 0.183 | 10         | -0.09 (-0.16 to -0.02) | <b>0.009</b> | 0.232 |
| L.HDL.C                                        | 42                  | 0.99 (0.94-1.05)        | 0.781        | 0.509 | 54         | 0.00 (-0.03 to 0.03)   | 0.930        | 0.443 |
| XL.HDL.C                                       | 30                  | 0.98 (0.91-1.06)        | 0.646        | 0.044 | 36         | 0.00 (-0.04 to 0.04)   | 0.884        | 0.915 |
| <b>Cholesterol in LDL and larger particles</b> |                     |                         |              |       |            |                        |              |       |
| S.LDL.C                                        | 36                  | 1.08 (1.02-1.15)        | <b>0.010</b> | 0.539 | 46         | 0.06 (0.02 to 0.11)    | <b>0.002</b> | 0.012 |
| M.LDL.C                                        | 36                  | 1.07 (1.01-1.14)        | 0.030        | 0.716 | 49         | 0.06 (0.02 to 0.10)    | <b>0.002</b> | 0.027 |
| L.LDL.C                                        | 40                  | 1.07 (1.01-1.13)        | 0.022        | 0.614 | 57         | 0.06 (0.02 to 0.09)    | <b>0.002</b> | 0.095 |
| IDL.C                                          | 42                  | 1.08 (1.02-1.14)        | <b>0.008</b> | 0.589 | 42         | 0.05 (0.01 to 0.09)    | <b>0.008</b> | 0.027 |
| S.VLDL.C                                       | 26                  | 1.08 (1.00-1.18)        | 0.057        | 0.186 | 31         | 0.05 (-0.01 to 0.10)   | 0.091        | 0.367 |
| M.VLDL.C                                       | 24                  | 1.09 (1.01-1.19)        | 0.033        | 0.137 | 24         | -0.01 (-0.07 to 0.06)  | 0.866        | 0.472 |
| L.VLDL.C                                       | 17                  | 1.05 (0.95-1.16)        | 0.354        | 0.116 | 17         | -0.05 (-0.12 to 0.03)  | 0.215        | 0.791 |
| <b>Triglycerides in lipoprotein particles</b>  |                     |                         |              |       |            |                        |              |       |
| S.HDL.TG                                       | 25                  | <b>1.14 (1.04-1.23)</b> | <b>0.003</b> | 0.175 | 31         | -0.04 (-0.09 to 0.02)  | 0.200        | 0.018 |
| XL.HDL.TG                                      | 76                  | 1.03 (0.99-1.07)        | 0.165        | 0.437 | 88         | 0.00 (-0.02 to 0.03)   | 0.744        | 0.846 |
| IDL.TG                                         | 41                  | 1.07 (1.01-1.14)        | 0.027        | 0.685 | 41         | 0.02 (-0.02 to 0.06)   | 0.355        | 0.013 |
| XS.VLDL.TG                                     | 27                  | 1.07 (0.99-1.15)        | 0.095        | 0.325 | 28         | -0.02 (-0.07 to 0.04)  | 0.568        | 0.039 |
| S.VLDL.TG                                      | 26                  | 1.08 (0.99-1.17)        | 0.074        | 0.164 | 26         | -0.03 (-0.09 to 0.03)  | 0.264        | 0.177 |
| M.VLDL.TG                                      | 18                  | 1.03 (0.94-1.14)        | 0.509        | 0.162 | 21         | -0.03 (-0.10 to 0.05)  | 0.486        | 0.857 |
| L.VLDL.TG                                      | 15                  | 1.04 (0.94-1.17)        | 0.432        | 0.029 | 15         | -0.06 (-0.14 to 0.02)  | 0.131        | 0.663 |
| XL.VLDL.TG                                     | 12                  | 1.01 (0.89-1.15)        | 0.829        | 0.108 | 14         | -0.04 (-0.13 to 0.04)  | 0.315        | 0.878 |
| XXL.VLDL.TG                                    | 8                   | 1.03 (0.89-1.21)        | 0.673        | 0.213 | 10         | -0.04 (-0.14 to 0.06)  | 0.432        | 0.751 |

**Bold** indicates p-values <0.05 after adjustment for false discovery rate (FDR).

Odds Ratios correspond to 1 SD increment in the corresponding variable. P-het values correspond to the p-value of the Cochran's Q statistic exploring heterogeneity across the estimates.



**Supplementary Table 8. Multivariable Mendelian randomization (MR) association estimates of cholesterol and triglyceride concentrations across lipoprotein particles with small vessel stroke and WMH volume.**

| Outcome                                                                    | Small vessel stroke |                            | WMH volume             |              |
|----------------------------------------------------------------------------|---------------------|----------------------------|------------------------|--------------|
|                                                                            | OR (95%CI)          | p-value                    | beta (95%CI)           | p-value      |
| <b>Cholesterol in HDL particles [adjusted for LDL-C and TG]</b>            |                     |                            |                        |              |
| M.HDL.C                                                                    | 0.83 (0.76-0.91)    | <b>4.3x10<sup>-5</sup></b> | -0.08 (-0.13 to -0.02) | <b>0.008</b> |
| L.HDL.C                                                                    | 0.95 (0.90-1.00)    | 0.063                      | -0.03 (-0.07 to 0.01)  | 0.145        |
| XL.HDL.C                                                                   | 0.95 (0.89-1.01)    | 0.090                      | -0.02 (-0.07 to 0.02)  | 0.314        |
| <b>Cholesterol in LDL and larger particles [adjusted for HDL-C and TG]</b> |                     |                            |                        |              |
| S.LDL.C                                                                    | 1.11 (1.03-1.19)    | <b>0.004</b>               | 0.02 (-0.02 to 0.06)   | 0.366        |
| M.LDL.C                                                                    | 1.11 (1.04-1.18)    | <b>0.002</b>               | 0.02 (-0.02 to 0.06)   | 0.325        |
| L.LDL.C                                                                    | 1.11 (1.04-1.19)    | <b>0.001</b>               | 0.02 (-0.02 to 0.06)   | 0.338        |
| IDL.C                                                                      | 1.11 (1.04-1.18)    | <b>0.001</b>               | 0.02 (-0.02 to 0.05)   | 0.413        |
| S.VLDL.C                                                                   | 1.15 (1.04-1.26)    | <b>0.005</b>               | -0.01 (-0.07 to 0.05)  | 0.821        |
| M.VLDL.C                                                                   | 1.17 (1.02-1.35)    | 0.024                      | -0.05 (-0.14 to 0.05)  | 0.326        |
| L.VLDL.C                                                                   | 1.08 (0.90-1.30)    | 0.420                      | -0.11 (-0.23 to 0.00)  | 0.058        |
| <b>TG in any lipoprotein particles [adjusted for HDL-C and LDL-C]</b>      |                     |                            |                        |              |
| S.HDL.TG                                                                   | 1.11 (1.02-1.22)    | 0.016                      | -0.06 (-0.12 to 0.00)  | 0.047        |
| XL.HDL.TG                                                                  | 1.07 (1.02-1.14)    | 0.010                      | -0.03 (-0.07 to 0.01)  | 0.132        |
| IDL.TG                                                                     | 1.09 (1.01-1.17)    | 0.018                      | -0.05 (-0.09 to 0.00)  | 0.051        |
| XS.VLDL.TG                                                                 | 1.07 (1.00-1.15)    | 0.052                      | -0.04 (-0.08 to 0.01)  | 0.117        |
| S.VLDL.TG                                                                  | 1.05 (0.97-1.13)    | 0.242                      | -0.04 (-0.09 to 0.00)  | 0.072        |
| M.VLDL.TG                                                                  | 1.04 (0.96-1.13)    | 0.362                      | -0.06 (-0.10 to -0.01) | 0.030        |
| L.VLDL.TG                                                                  | 1.03 (0.94-1.12)    | 0.524                      | -0.05 (-0.11 to 0.00)  | 0.063        |
| XL.VLDL.TG                                                                 | 1.00 (0.91-1.09)    | 0.937                      | -0.06 (-0.11 to 0.00)  | 0.038        |
| XXL.VLDL.TG                                                                | 1.02 (0.93-1.13)    | 0.646                      | -0.05 (-0.11 to 0.01)  | 0.117        |

**Bold** indicates p-values <0.05 after adjustment for false discovery rate (FDR).

Odds Ratios correspond to 1 SD increment in the corresponding variable.

For the multivariable MR analyses we used a genetic score for HDL-C, LDL-C and larger particle cholesterol, and for TGT, by combining all unique instruments significantly associated with HDL-C or cholesterol concentrations in HDL particles, LDL-C or cholesterol concentrations in LDL and larger ApoB particles, and with TG or triglyceride concentrations in any TG particles, respectively.

**Supplementary Table 9. Mendelian randomization (MR) association estimates of cholesterol and triglyceride concentrations across lipoprotein particles with small vessel stroke and WMH volume, as derived from alternative MR methods in case of heterogeneity ( $p < 0.10$  in Cochran's Q) in the IVW analysis.** Shown are the results derived from weighed median and MR-Egger analyses.

| <b>Small vessel stroke</b> | <b>MR method</b> | <b>OR</b>   | <b>SE</b> | <b>95%CI</b> |       | <b>p-value</b> |
|----------------------------|------------------|-------------|-----------|--------------|-------|----------------|
| <b>XL.HDL.C</b>            | IVW              | 0.96        | 0.062     | 0.85         | 1.09  | 0.537          |
|                            | Weighted median  | 1.02        | 0.068     | 0.90         | 1.17  | 0.731          |
|                            | MR Egger         | 0.95        | 0.212     | 0.63         | 1.44  | 0.812          |
|                            | Egger Intercept  | 1.00        | 0.023     | 0.96         | 1.05  | 0.952          |
| <b>L.VLDL.TG</b>           | IVW              | 1.05        | 0.077     | 0.90         | 1.22  | 0.536          |
|                            | Weighted median  | 1.01        | 0.079     | 0.86         | 1.18  | 0.910          |
|                            | MR Egger         | 1.13        | 0.206     | 0.76         | 1.69  | 0.549          |
|                            | Egger Intercept  | 0.99        | 0.022     | 0.95         | 1.03  | 0.690          |
| <b>WMH volume</b>          |                  |             |           |              |       |                |
| <b>Small vessel stroke</b> | <b>MR method</b> | <b>beta</b> | <b>SE</b> | <b>95%CI</b> |       | <b>p-value</b> |
| <b>S.LDL.C</b>             | IVW              | 0.066       | 0.027     | 0.013        | 0.118 | 0.014          |
|                            | Weighted median  | 0.054       | 0.03      | -0.005       | 0.114 | 0.072          |
|                            | MR Egger         | 0.098       | 0.05      | 0.000        | 0.197 | 0.050          |
|                            | Egger Intercept  | -0.005      | 0.006     | -0.017       | 0.008 | 0.438          |
| <b>M.LDL.C</b>             | IVW              | 0.063       | 0.024     | 0.017        | 0.110 | 0.008          |
|                            | Weighted median  | 0.088       | 0.032     | 0.026        | 0.150 | 0.006          |
|                            | MR Egger         | 0.101       | 0.043     | 0.017        | 0.185 | 0.019          |
|                            | Egger Intercept  | -0.006      | 0.006     | -0.017       | 0.005 | 0.292          |
| <b>L.LDL.C</b>             | IVW              | 0.058       | 0.021     | 0.017        | 0.099 | 0.005          |
|                            | Weighted median  | 0.065       | 0.03      | 0.005        | 0.124 | 0.033          |
|                            | MR Egger         | 0.099       | 0.037     | 0.027        | 0.171 | 0.007          |
|                            | Egger Intercept  | -0.007      | 0.005     | -0.016       | 0.003 | 0.172          |
| <b>IDL.C</b>               | IVW              | 0.050       | 0.023     | 0.005        | 0.095 | 0.028          |
|                            | Weighted median  | 0.053       | 0.027     | 0.000        | 0.106 | 0.051          |
|                            | MR Egger         | 0.114       | 0.041     | 0.033        | 0.195 | 0.006          |
|                            | Egger Intercept  | -0.009      | 0.005     | -0.018       | 0.001 | 0.067          |
| <b>IDL.TG</b>              | IVW              | 0.021       | 0.027     | -0.031       | 0.073 | 0.428          |
|                            | Weighted median  | 0.013       | 0.036     | -0.056       | 0.083 | 0.710          |
|                            | MR Egger         | 0.082       | 0.066     | -0.047       | 0.211 | 0.214          |
|                            | Egger Intercept  | -0.008      | 0.008     | -0.023       | 0.007 | 0.313          |
| <b>XS.VLDL.TG</b>          | IVW              | -0.016      | 0.037     | -0.088       | 0.056 | 0.667          |
|                            | Weighted median  | 0.002       | 0.044     | -0.084       | 0.088 | 0.964          |
|                            | MR Egger         | -0.036      | 0.119     | -0.268       | 0.196 | 0.762          |
|                            | Egger Intercept  | 0.002       | 0.012     | -0.022       | 0.026 | 0.858          |

Odds Ratios correspond to 1 SD increment in the corresponding variable.

**Supplementary Table 10. Mendelian randomization (MR) association estimates of HDL-C raising variants in/close to the *CEPT* locus, and risk of small vessel stroke, as derived from alternative MR methods.** Shown are the results derived from weighed median and MR-Egger analyses, because the IVW MR analysis showed significant heterogeneity.

| <b>Small vessel stroke</b>                   | <b>MR method</b> | <b>OR</b> | <b>95%CI</b> | <b>p-value</b> |
|----------------------------------------------|------------------|-----------|--------------|----------------|
| <b>HDL-C raising variants in <i>CETP</i></b> | IVW MR           | 0.82      | (0.75-0.89)  | 0.001          |
|                                              | Weighted median  | 0.81      | (0.68-0.96)  | 0.014          |
|                                              | MR Egger         | 0.71      | (0.57-0.89)  | 0.003          |
|                                              | Egger Intercept  | 1.01      | (0.99-1.03)  | 0.404          |

Odds Ratios correspond to 1 SD increment in HDL-C for the *CETP* variants.

**Supplementary Table 11. Mendelian randomization (MR) association estimates of HDL-C raising variants in/close to the *CEPT* locus, and risk of small vessel stroke, WMH volume, and risk of intracerebral hemorrhage, as derived from IVW MR analyses and multivariable MR analyses adjusting for the effects of the variants on both HDL-C and LDL-C. Shown are the results derived from the IVW MR and multivariable MR analyses.**

| Outcome                    | IVW MR                  |                      | Multivariable MR        |         |
|----------------------------|-------------------------|----------------------|-------------------------|---------|
|                            | Effect estimate (95%CI) | p-value              | Effect estimate (95%CI) | p-value |
| <b>Small vessel stroke</b> | <b>OR</b>               |                      | <b>OR</b>               |         |
| HDL-C (1 SD increment)     | 0.82 (0.75-0.89)        | 9.0x10 <sup>-6</sup> | 0.87 (0.74-1.02)        | 0.094   |
| LDL-C (1 SD decrement)     | 0.41 (0.23-0.73)        | 0.003                | 1.40 (0.64-3.06)        | 0.414   |
| <b>WMH volume</b>          | <b>beta</b>             |                      | <b>beta</b>             |         |
| HDL-C (1 SD increment)     | -0.08 (-0.13 to -0.02)  | 0.008                | -0.27 (-0.64 to 0.11)   | 0.166   |
| LDL-C (1 SD decrement)     | -0.28 (0.00 to 0.56)    | 0.048                | 0.34 (-2.15 to 1.47)    | 0.714   |

Odds Ratios and beta coefficients correspond to 1 SD increment in HDL-C and 1 SD decrement in LDL-C.

**Supplementary Table 12. Mendelian randomization (MR) association estimates of cholesterol and triglyceride concentrations across lipoprotein particles with intracerebral hemorrhage.**

Shown are the results derived from IVW MR and multivariable MR analyses.

| Outcome                                                                         | IVW MR   |                  |              |       | Multivariable MR |              |
|---------------------------------------------------------------------------------|----------|------------------|--------------|-------|------------------|--------------|
|                                                                                 | SNPs (N) | OR (95%CI)       | p-value      | p-het | OR (95%CI)       | p-value      |
| <b>Cholesterol in HDL particles [adjusted for LDL-C and TG]</b>                 |          |                  |              |       |                  |              |
| M.HDL.C                                                                         | 8        | 1.33 (0.92-1.92) | 0.124        | 0.183 | 1.51 (1.17-1.95) | <b>0.001</b> |
| L.HDL.C                                                                         | 42       | 1.06 (0.89-1.26) | 0.534        | 0.509 | 1.09 (0.93-1.29) | 0.295        |
| XL.HDL.C                                                                        | 30       | 1.07 (0.85-1.34) | 0.570        | 0.044 | 1.15 (0.94-1.40) | 0.172        |
| <b>Cholesterol in LDL and larger particles [adjusted for HDL-C and TG]</b>      |          |                  |              |       |                  |              |
| S.LDL.C                                                                         | 36       | 0.76 (0.63-0.93) | <b>0.007</b> | 0.702 | 0.84 (0.69-1.01) | 0.066        |
| M.LDL.C                                                                         | 36       | 0.81 (0.67-0.97) | 0.019        | 0.472 | 0.85 (0.71-1.02) | 0.088        |
| L.LDL.C                                                                         | 40       | 0.79 (0.67-0.94) | <b>0.008</b> | 0.283 | 0.83 (0.70-0.99) | 0.036        |
| IDL.C                                                                           | 42       | 0.78 (0.65-0.92) | <b>0.004</b> | 0.589 | 0.78 (0.66-0.93) | <b>0.004</b> |
| S.VLDL.C                                                                        | 26       | 0.86 (0.66-1.12) | 0.264        | 0.040 | 0.80 (0.61-1.05) | 0.106        |
| M.VLDL.C                                                                        | 24       | 1.01 (0.78-1.32) | 0.923        | 0.074 | 0.90 (0.60-1.34) | 0.592        |
| L.VLDL.C                                                                        | 17       | 1.21 (0.86-1.69) | 0.267        | 0.035 | 0.87 (0.51-1.49) | 0.614        |
| <b>Triglycerides in any lipoprotein particle [adjusted for HDL-C and LDL-C]</b> |          |                  |              |       |                  |              |
| S.HDL.TG                                                                        | 25       | 0.85 (0.66-1.10) | 0.223        | 0.175 | 1.14 (0.87-1.50) | 0.346        |
| XL.HDL.TG                                                                       | 76       | 0.93 (0.82-1.06) | 0.291        | 0.437 | 0.94 (0.79-1.12) | 0.477        |
| IDL.TG                                                                          | 41       | 0.84 (0.68-1.04) | 0.117        | 0.171 | 0.88 (0.70-1.10) | 0.265        |
| S.VLDL.TG                                                                       | 26       | 1.07 (0.82-1.39) | 0.620        | 0.095 | 1.05 (0.84-1.31) | 0.665        |
| XS.VLDL.TG                                                                      | 27       | 0.96 (0.74-1.24) | 0.732        | 0.156 | 1.09 (0.87-1.37) | 0.447        |
| M.VLDL.TG                                                                       | 18       | 1.13 (0.82-1.54) | 0.458        | 0.050 | 1.23 (0.97-1.54) | 0.085        |
| L.VLDL.TG                                                                       | 15       | 1.40 (0.98-2.00) | 0.065        | 0.249 | 1.26 (0.99-1.60) | 0.055        |
| XL.VLDL.TG                                                                      | 12       | 1.46 (0.99-2.14) | 0.056        | 0.145 | 1.25 (0.97-1.60) | 0.081        |
| XXL.VLDL.TG                                                                     | 8        | 1.19 (0.77-1.86) | 0.434        | 0.124 | 1.22 (0.92-1.61) | 0.165        |

**Bold** indicates p-values <0.05 after adjustment for false discovery rate (FDR).

Odds Ratios correspond to 1 SD increment in the corresponding variable. P-het values correspond to the p-value of the Cochran's Q statistic exploring heterogeneity across the estimates.

For the multivariable MR analyses we used a genetic score for HDL-C, LDL-C and larger particle cholesterol, and for triglycerides, by combining all unique instruments significantly associated with HDL-C or cholesterol concentrations in HDL particles, LDL-C or cholesterol concentrations in LDL and larger ApoB particles, and with TG or triglyceride concentrations in any TG particles. For the concentration of cholesterol in HDL particles, we have performed adjustments for LDL-C and TG, for concentration of cholesterol in LDL and larger ApoB particles, we have performed adjustments for HDL-C and TG, and for triglyceride concentrations we have performed adjustments for HDL-C and LDL-C.

**Supplementary Figure 1. Sensitivity Mendelian randomization (MR) analyses between genetic determinants of blood lipid levels (HDL-C, LDL-C, TG) with risk of small vessel stroke.** Shown are the results derived from IVW MR, weighted median, MR-Egger, and the GSMR approach incorporated with the HEIDI-outlier detector. The genetic instruments are weighted either based on the estimates derived from the full GLGC+MVP sample, or from those derived from the restricted GLGC dataset, where patients under lipid-modifying treatment had been excluded.

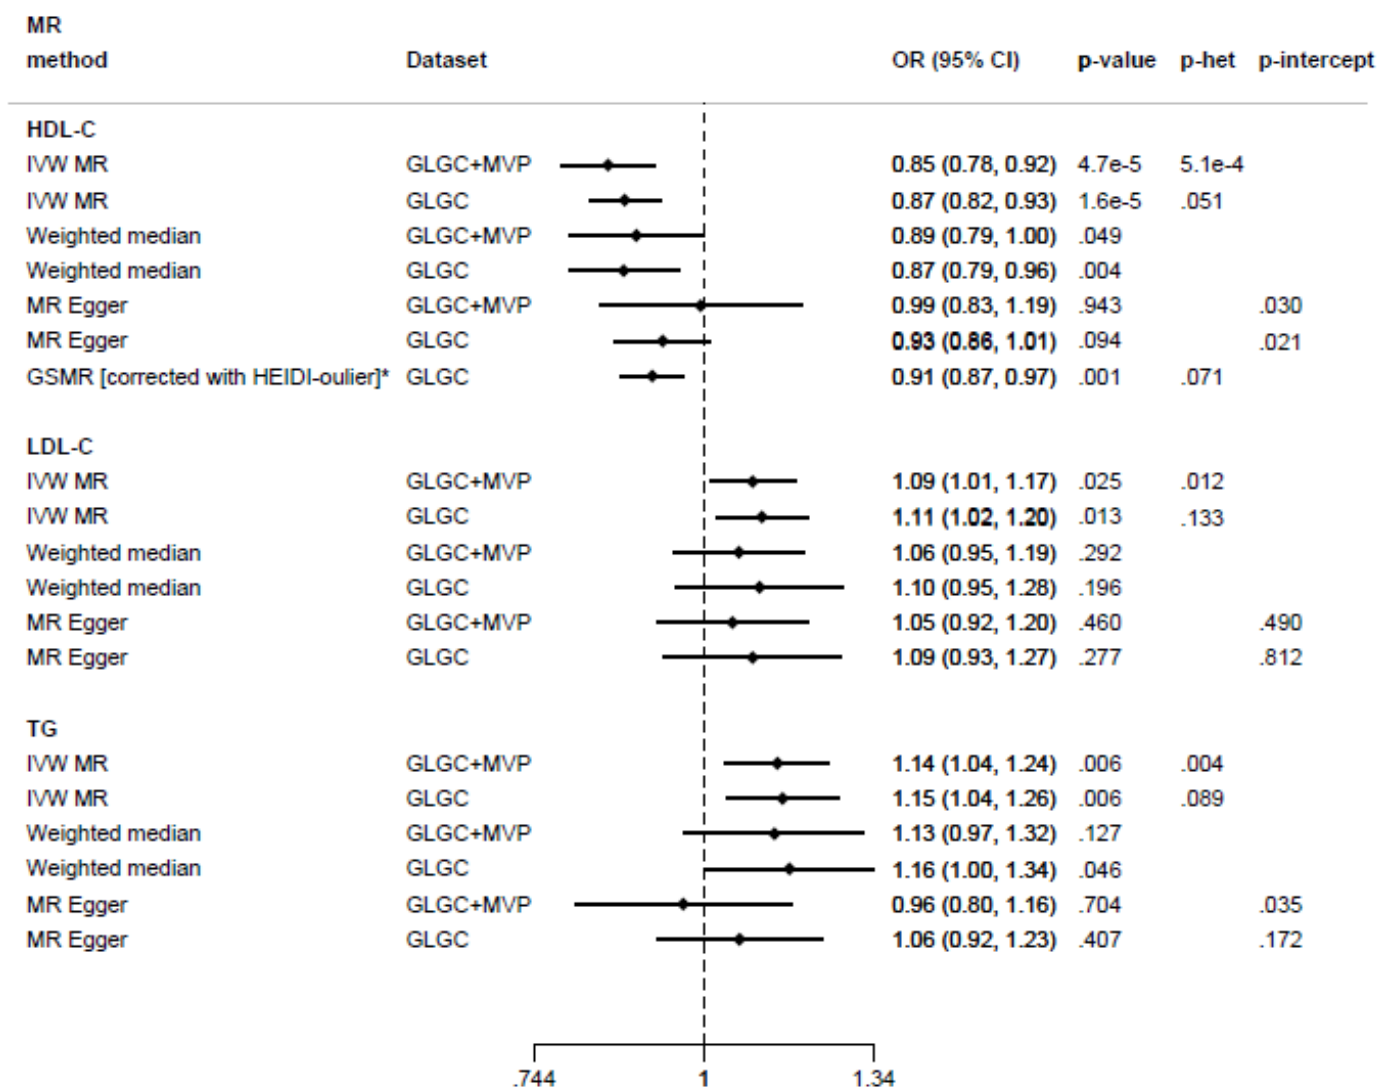

GLGC: global lipids genetics consortium; MVP: millions veteran program.

\* the HEIDI-outlier approach detected rs11875988, rs11065979, and rs12417015 as outliers and excluded them from the analyses

p-het: derived from the Cochran Q statistic for the IVW analyses and from the global heterogeneity test for the GSMR analyses.

p-intercept: statistical significance of the intercept derived from MR-Egger regression analyses

**Supplementary Figure 2. Sensitivity Mendelian randomization (MR) analyses between genetic determinants of blood lipid levels (HDL-C, LDL-C, TG) with WMH volume.**

Shown are the results derived from IVW MR, weighted median, MR-Egger, and the GSMR approach incorporated with the HEIDI-outlier detector. The genetic instruments are weighted either based on the estimates derived from the full GLGC+MVP sample, or from those derived from the restricted GLGC dataset, where patients under lipid-modifying treatment had been excluded.

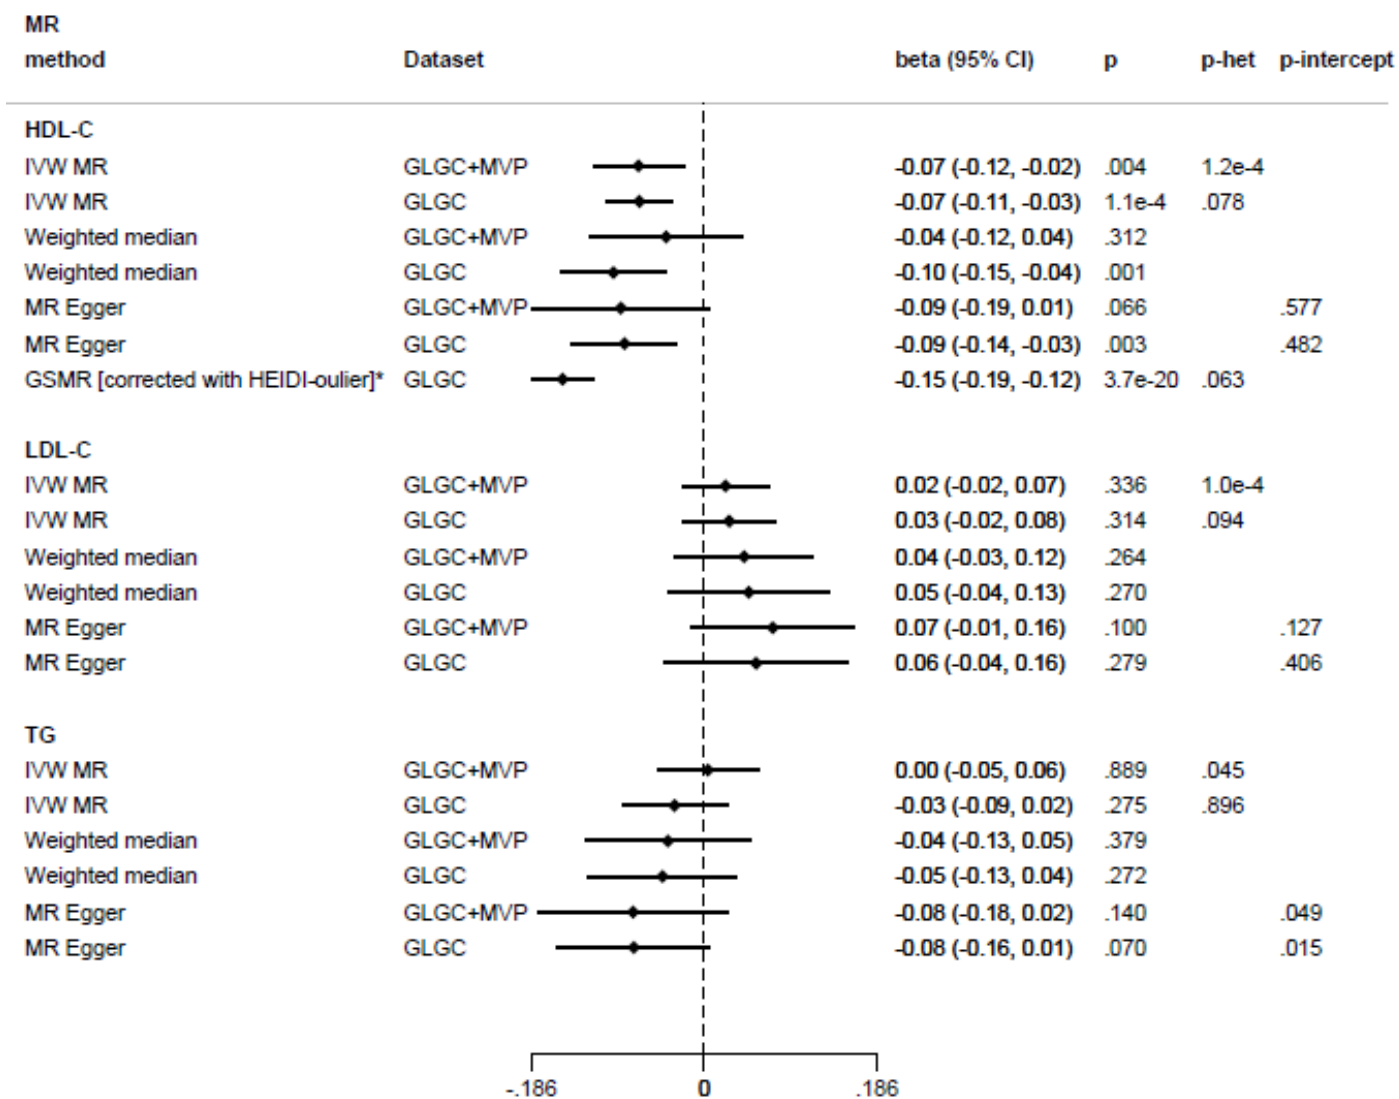

GLGC: global lipids genetics consortium; MVP: millions veteran program.

\* the HEIDI-outlier approach detected rs701106 and rs13116385 as outliers and excluded them from the analyses

p-het: derived from the Cochran Q statistic for the IVW analyses and from the global heterogeneity test for the GSMR analyses.

p-intercept: statistical significance of the intercept derived from MR-Egger regression analyses

**Supplementary Figure 3. Mendelian randomization (MR) associations between genetic determinants of blood lipid levels (HDL-C, LDL-C, TG) with (A) risk of small vessel stroke and (B) WMH volume when restricting instrument selection to those specific for the respective traits. Shown are the results derived from IVW MR.**

**(A) Small vessel stroke**

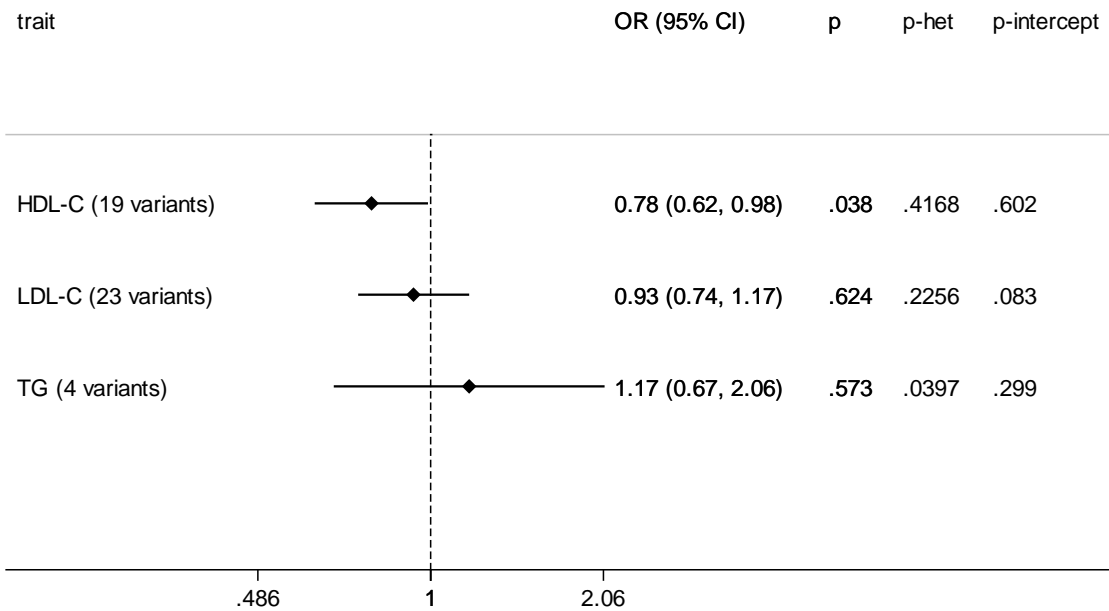

**(B) WMH volume**

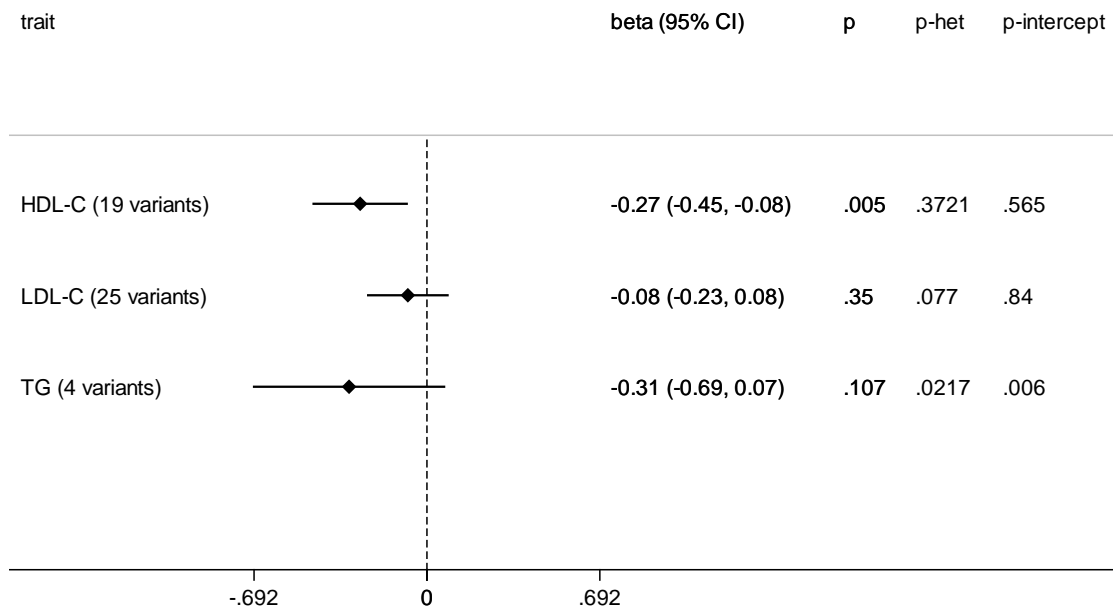



**Supplementary Figure 4. Mendelian randomization (MR) associations of all components of the HDL lipoprotein particles defined by size with (A) risk of small vessel stroke and (B) WMH volume. Shown are the results derived from IVW MR analyses.**

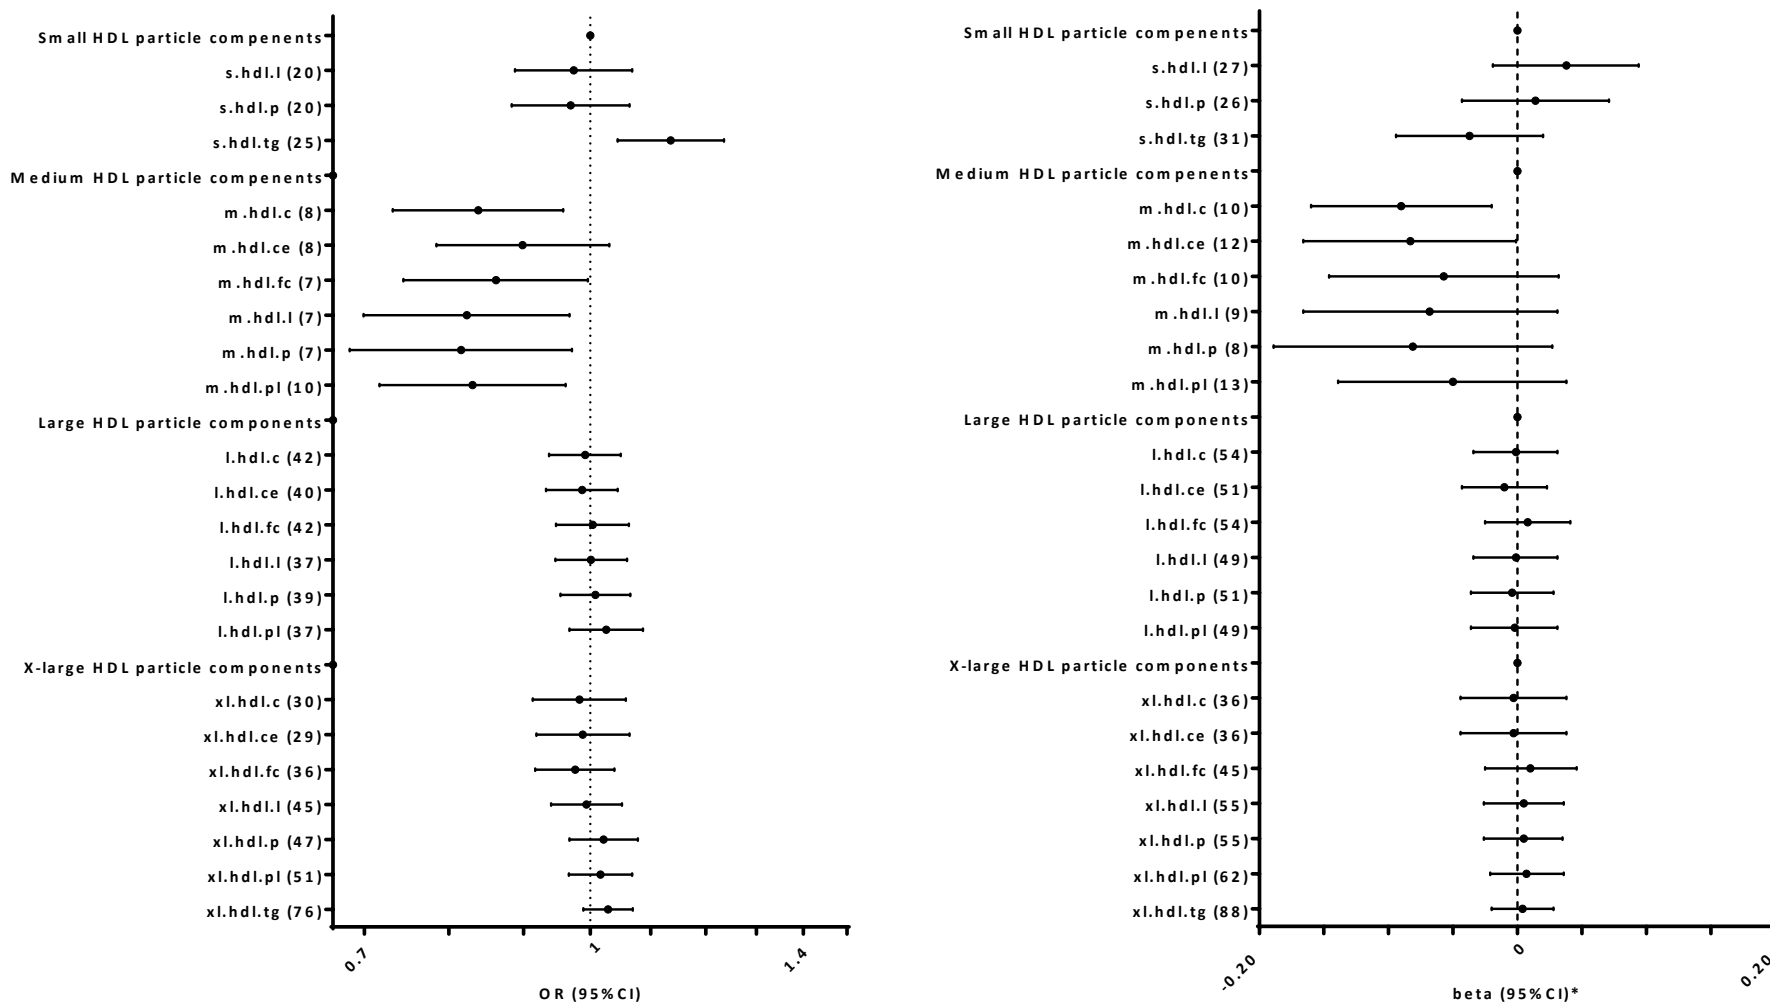

The first part of the abbreviations for the particle components indicates the size of the particles (small, medium, large, extra-large); the second refers to the type of lipoprotein particles (here HDL); the third part indicates the measured component in the respective size-defined particle: c, total cholesterol; ce, cholesterol-esters; fc, free cholesterol; l, total lipids; p, concentration of this particle class; pl, phospholipids; tg, triglycerides.

**Supplementary Figure 5. Mendelian randomization (MR) associations of cholesterol (C) and triglyceride (TG) concentrations in lipoprotein particles defined by size with intracerebral hemorrhage.** Shown are the results derived from IVW MR analyses.

trait

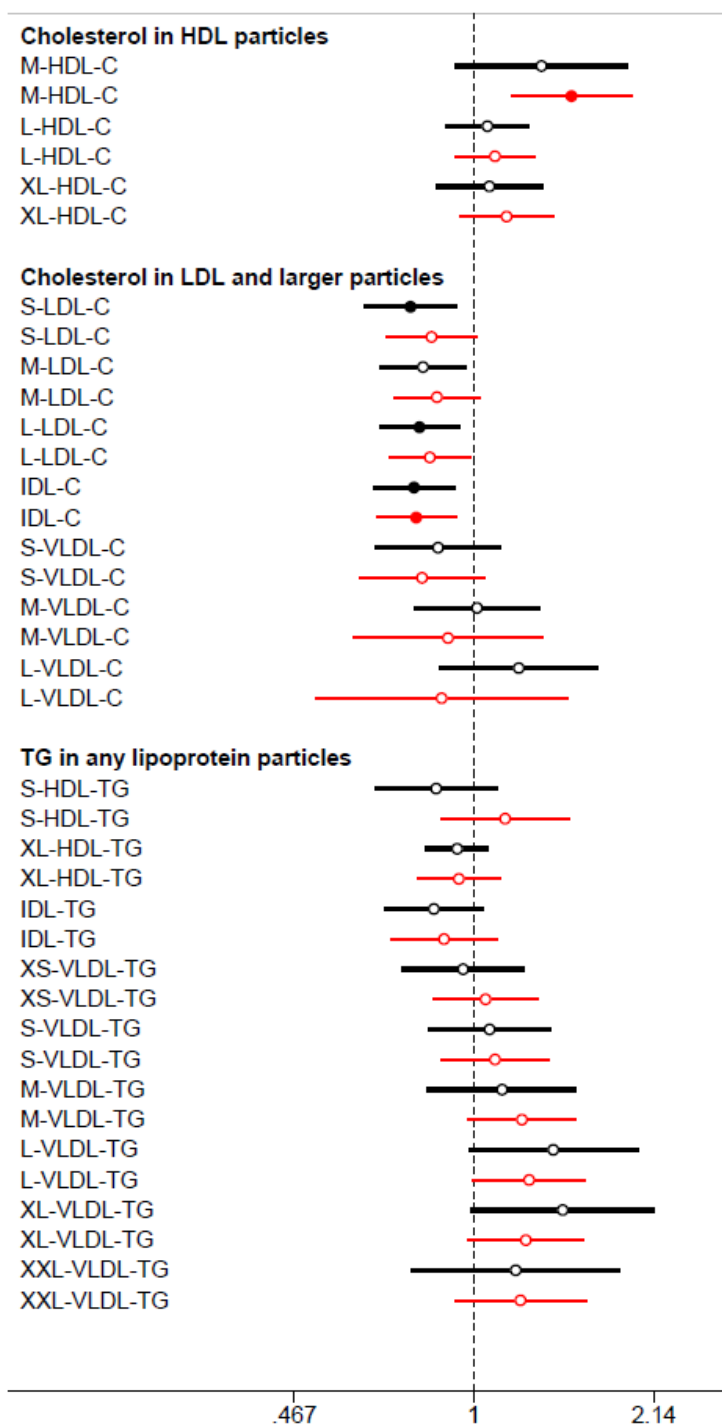

Solid-centre circles indicate association estimates with a q-value <0.05 after adjusting for multiple testing comparisons with the false discovery rate (FDR).

The black point estimates and confidence interval lines correspond to the results of the random-effects IVW MR analyses, whereas the red point estimates and confidence interval lines to the multivariable MR analyses.

**Supplementary Figure 6. Mendelian randomization associations between HDL-C-raising and LDL-C-lowering genetic variants in the loci of known lipid-modifying drug targets and risk of intracerebral hemorrhage.** Shown are the results derived from IVW MR analyses.

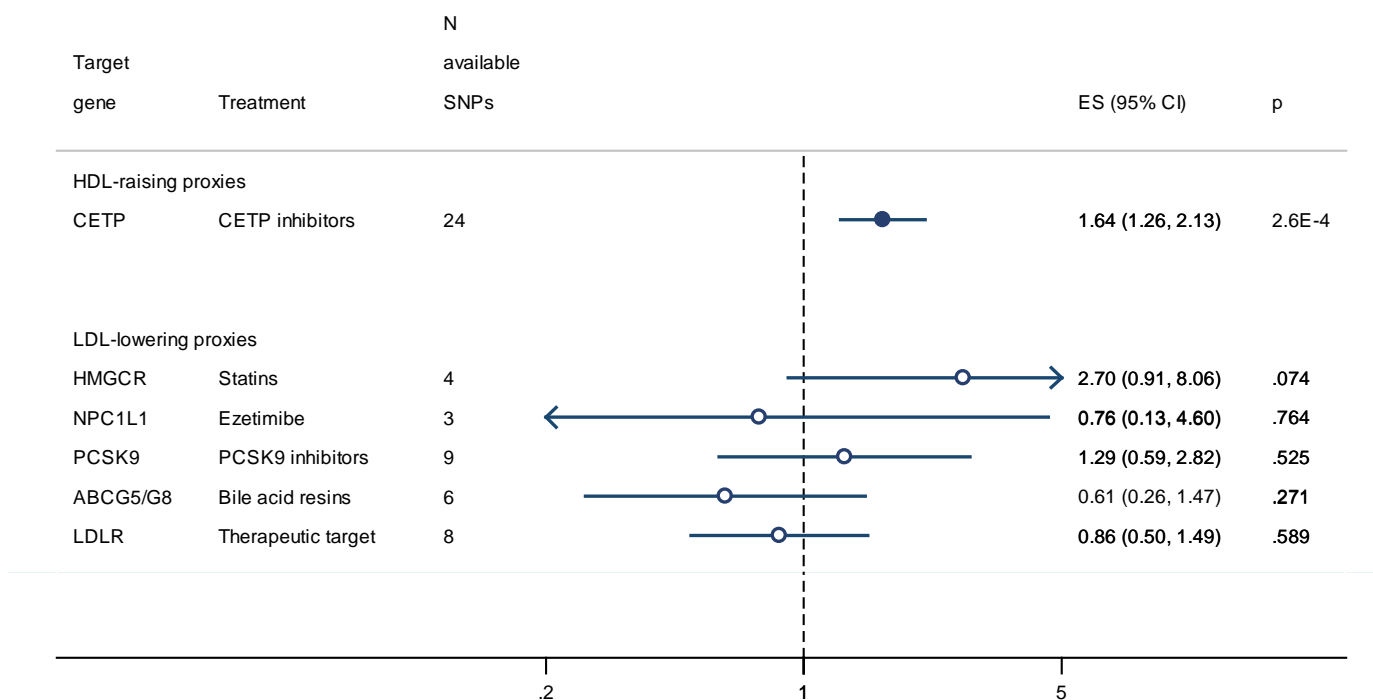

The results are scaled per 1 SD increment in circulating HDL-C levels for the HDL-C-raising drug targets and per 1 SD increment in circulating LDL- for the LDL-C-lowering drug targets, respectively.

**Supplementary Figure 7. Mendelian randomization (MR) associations between HDL-C-raising genetic variants in the *CETP* locus and risk of (A) deep and (B) lobar intracerebral hemorrhage (ICH).** Shown are the results from the IVW MR analyses. The results are scaled per 1 SD increment in circulating HDL-C levels.

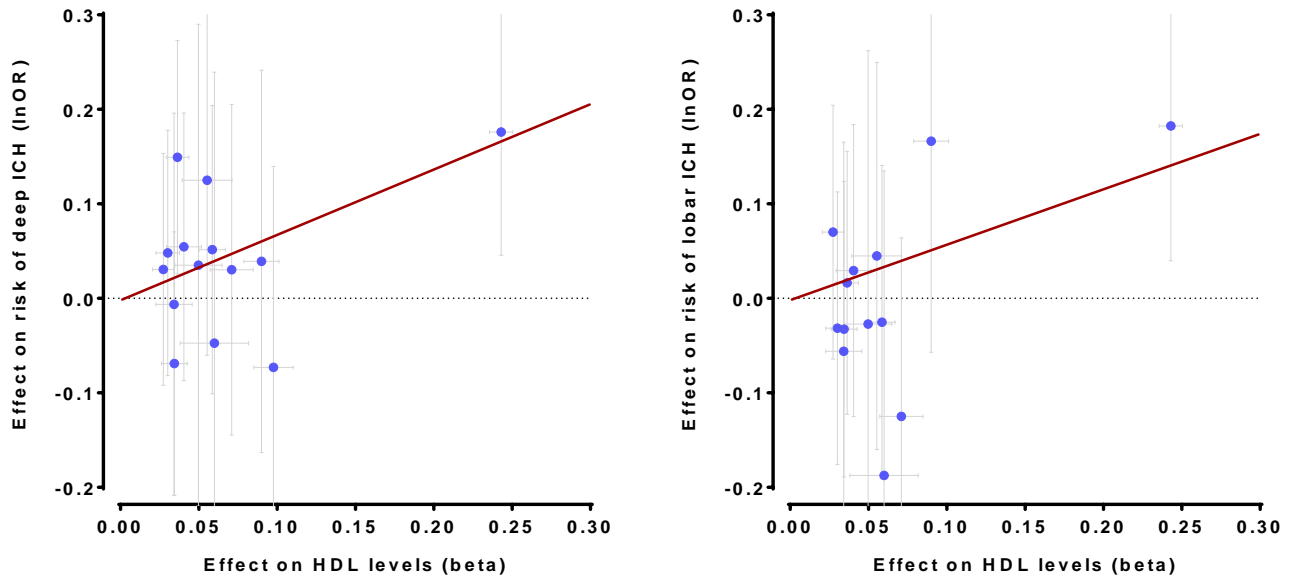

Supplement: awz413_supplementary_online.pdf [file awz413_supplementary_online.pdf]
